# Supplementary material
Source: MDPI journal article supplement (https://www.mdpi.com/2673-7159/2/4/38)
Supplement: s1 [file s1]

Archive with 2 entries (2 files):
- File S1.pdf
- File S2.xlsx
