# Supplementary material
Source: MDPI journal article supplement (https://www.mdpi.com/2673-7159/2/4/38)
Supplement: s1 [file s1 › File S1.pdf]

### Q1: Perceived benefits and costs of reducing possum numbers

We are interested in your thoughts about reducing possum numbers. How strongly do you agree or disagree with the following statements?

| Item                                                                                          | Strongly agree           | Agree                    | Unsure/<br>neutral       | Disagree                 | Strongly disagree        |
|-----------------------------------------------------------------------------------------------|--------------------------|--------------------------|--------------------------|--------------------------|--------------------------|
| We need to reduce the number of possums to protect our native birds and wildlife              | <input type="checkbox"/> |
| We need to reduce the number of possums to conserve our native plants and forests             | <input type="checkbox"/> |
| We need to reduce the number of possums to help eradicate bovine Tb                           | <input type="checkbox"/> |
| We need to reduce the number of possums to prevent damage to plant nurseries                  | <input type="checkbox"/> |
| We need to reduce the number of possums because they compete with livestock by eating pasture | <input type="checkbox"/> |
| We need to reduce the number of possums to prevent damage to orchards and gardens             | <input type="checkbox"/> |
| Possums have just as much of a right to life as other animals                                 | <input type="checkbox"/> |
| We need possums because they compete with other pests                                         | <input type="checkbox"/> |
| We need to have some possums to keep people employed in the fur industry                      | <input type="checkbox"/> |

## Q2: The need for action

We are interested in how strongly you feel about the need for action to be taken to reduce possum numbers. How strongly do you agree or disagree with the following statements?

| Item                                                                                     | Strongly agree           | Agree                    | Unsure/<br>neutral       | Disagree                 | Strongly disagree        |
|------------------------------------------------------------------------------------------|--------------------------|--------------------------|--------------------------|--------------------------|--------------------------|
| Reducing the number of possums is the right thing to do                                  | <input type="checkbox"/> |
| I feel some responsibility for reducing the number of possums in my area                 | <input type="checkbox"/> |
| I am prepared to take some kind of action to reduce possum numbers in my area            | <input type="checkbox"/> |
| It is important to work together to reduce the number of possums                         | <input type="checkbox"/> |
| Nearly everyone I know thinks reducing possum numbers is the right thing to do           | <input type="checkbox"/> |
| Most people I know feel some responsibility for reducing the number of possums           | <input type="checkbox"/> |
| I think nearly everyone is prepared to take some kind of action to reduce possum numbers | <input type="checkbox"/> |
| I am prepared to make sacrifices to reduce the number of possums in my area              | <input type="checkbox"/> |
| Most people are prepared to make sacrifices to reduce possum numbers                     | <input type="checkbox"/> |
| Most people know we have to work together to reduce the number of possums in our area    | <input type="checkbox"/> |

### Q3: Involvement with reducing possum numbers

We are interested in your opinions about reducing possum numbers. How strongly do you agree or disagree with the following statements?

| Item                                                                          | Strongly agree           | Agree                    | Unsure/<br>neutral       | Disagree                 | Strongly disagree        |
|-------------------------------------------------------------------------------|--------------------------|--------------------------|--------------------------|--------------------------|--------------------------|
| I think reducing possum numbers is rewarding                                  | <input type="checkbox"/> |
| The consequences are serious if we don't reduce possum numbers                | <input type="checkbox"/> |
| Reducing possum numbers is something I am passionate about                    | <input type="checkbox"/> |
| It would be a big deal if mistakes were made while reducing possum numbers    | <input type="checkbox"/> |
| My position on reducing possum numbers tells others something about me        | <input type="checkbox"/> |
| Reducing possum numbers is important to me                                    | <input type="checkbox"/> |
| Making decisions about how to reduce possum numbers is complicated            | <input type="checkbox"/> |
| What others think about reducing possum numbers tells me something about them | <input type="checkbox"/> |
| I care a lot about reducing possum numbers                                    | <input type="checkbox"/> |
| Making decisions about how to reduce possum numbers is difficult              | <input type="checkbox"/> |

#### Q4: Perceived advantages and disadvantages of using 1080 to reduce predator numbers

How strongly do you agree with the following statements about using 1080 to reduce predator numbers?

| Item                                                                                                                               | Strongly agree           | Agree                    | Unsure/<br>neutral       | Disagree                 | Strongly disagree        |
|------------------------------------------------------------------------------------------------------------------------------------|--------------------------|--------------------------|--------------------------|--------------------------|--------------------------|
| 1080 helps to control possums, rats and stoats                                                                                     | <input type="checkbox"/> |
| 1080 is a cruel and inhumane way to kill animals such as stoats and rats                                                           | <input type="checkbox"/> |
| Independent scientific studies have proven that native bird populations increase in areas where 1080 poison is used                | <input type="checkbox"/> |
| 1080 poison is more effective in saving birdlife than trapping the predators                                                       | <input type="checkbox"/> |
| 1080 poison is biodegradable and at most takes several months to break down                                                        | <input type="checkbox"/> |
| The benefits to bird populations from increased nesting success following 1080 predator eradication far outweigh any side effects  | <input type="checkbox"/> |
| 1080 kills as many birds, if not more, than it might save                                                                          | <input type="checkbox"/> |
| The suffering of predators due to 1080 poisoning far outweighs the benefits of increasing nesting success and native bird numbers  | <input type="checkbox"/> |
| 1080 is a risk to farm animals and pets                                                                                            | <input type="checkbox"/> |
| 1080 is a risk to peoples' health                                                                                                  | <input type="checkbox"/> |
| A benefit of using 1080 to reduce possum numbers is that stoats also can be killed if they feed on poisoned possums, rats and mice | <input type="checkbox"/> |
| 1080 rapidly becomes harmless if it gets into rivers and lakes                                                                     | <input type="checkbox"/> |
| Tb can be eradicated from cattle in New Zealand by using 1080 to reduce possum numbers                                             | <input type="checkbox"/> |
| 1080 poison gets into our waterways                                                                                                | <input type="checkbox"/> |

### Q5: Involvement with a program of ground baiting for possums

1080 can be used in containers called bait stations which are usually placed on the ground, on fences or in trees. We are interested in your thoughts on using bait stations with 1080 to reduce possum numbers. How strongly do you agree or disagree with the following statements?

| Item                                                                                                         | Strongly agree           | Agree                    | Unsure/<br>neutral       | Disagree                 | Strongly disagree        |
|--------------------------------------------------------------------------------------------------------------|--------------------------|--------------------------|--------------------------|--------------------------|--------------------------|
| It's rewarding to know 1080 is being used in bait stations to reduce possum numbers                          | <input type="checkbox"/> |
| The consequences are serious if mistakes are made using 1080 in bait stations to reduce possum numbers.      | <input type="checkbox"/> |
| I am passionate about 1080 being used in bait stations to reduce possum numbers                              | <input type="checkbox"/> |
| It would be a big deal if a mistake was made with using 1080 in bait stations to reduce possum numbers       | <input type="checkbox"/> |
| My position on using bait stations with 1080 to reduce possum numbers tells others something about me        | <input type="checkbox"/> |
| Having a program using 1080 in bait stations to reduce possum numbers is important to me                     | <input type="checkbox"/> |
| Making decisions about using 1080 in bait stations to reduce possum numbers is complicated                   | <input type="checkbox"/> |
| What others think about using bait stations with 1080 to reduce possum numbers tells me something about them | <input type="checkbox"/> |
| I care a lot about using 1080 in bait stations to reduce possum numbers                                      | <input type="checkbox"/> |
| Making decisions about using 1080 in bait stations to reduce possum numbers is difficult                     | <input type="checkbox"/> |

**Q6: Attitudes towards ground baiting of possums**

How strongly do you agree or disagree with the following statements about using 1080 in bait stations to reduce possum numbers?

| Item                                                                                          | Strongly agree           | Agree                    | Unsure/<br>neutral       | Disagree                 | Strongly disagree        |
|-----------------------------------------------------------------------------------------------|--------------------------|--------------------------|--------------------------|--------------------------|--------------------------|
| I think bait stations containing 1080 should be used to reduce possum numbers                 | <input type="checkbox"/> |
| I think using bait stations containing 1080 to reduce possum numbers is the right thing to do | <input type="checkbox"/> |
| I believe it is wrong to use bait stations containing 1080 to reduce possum numbers           | <input type="checkbox"/> |
| I think it would be good to use bait stations containing 1080 to reduce possum numbers        | <input type="checkbox"/> |

**Q7: Which of the following statements best describes you?**

| Item                                                                                                          | Describes me             |
|---------------------------------------------------------------------------------------------------------------|--------------------------|
| I really think using bait stations containing 1080 to reduce possum numbers is the right thing to do          | <input type="checkbox"/> |
| It doesn't really matter to me whether or not bait stations containing 1080 are used to reduce possum numbers | <input type="checkbox"/> |
| I am not really sure if using bait stations containing 1080 to reduce possum numbers is the best way to go    | <input type="checkbox"/> |
| I haven't put much thought into using bait stations containing 1080 to reduce possum numbers                  | <input type="checkbox"/> |
| I strongly believe that using bait stations containing 1080 to reduce possum numbers is a bad thing to do     | <input type="checkbox"/> |

**Q8: Perceived advantages and disadvantages of ground baiting using 1080 to reduce possum numbers**

How strongly do you agree or disagree with the following statements about using bait stations with 1080 to reduce possum numbers?

| Item                                                                                                      | Strongly agree           | Agree                    | Unsure/<br>neutral       | Disagree                 | Strongly disagree        |
|-----------------------------------------------------------------------------------------------------------|--------------------------|--------------------------|--------------------------|--------------------------|--------------------------|
| Using bait stations with 1080 to reduce possum numbers is not cost effective                              | <input type="checkbox"/> |
| Using bait stations with 1080 to reduce possum numbers is not practical in some areas                     | <input type="checkbox"/> |
| Using bait stations with 1080 to reduce possum numbers is much safer where there are farms and water ways | <input type="checkbox"/> |
| Using bait stations with 1080 to reduce possum numbers is a risk to peoples' health                       | <input type="checkbox"/> |
| Using bait stations with 1080 to reduce possum numbers is a danger to wild foods                          | <input type="checkbox"/> |
| Using 1080 in bait stations helps save cattle and farmed deer from Tb                                     | <input type="checkbox"/> |
| Using 1080 in bait stations is bad for recreational hunting                                               | <input type="checkbox"/> |

**Q9: Involvement with a program of aerial baiting for possums**

1080 can be applied from the air using planes and helicopters. How strongly do you agree or disagree with the following statements about aerial baiting with 1080?

| Item                                                                                               | Strongly agree           | Agree                    | Unsure/<br>neutral       | Disagree                 | Strongly disagree        |
|----------------------------------------------------------------------------------------------------|--------------------------|--------------------------|--------------------------|--------------------------|--------------------------|
| It's rewarding to know aerial 1080 is being used to reduce possum numbers                          | <input type="checkbox"/> |
| The consequences are serious if mistakes are made while using aerial 1080 to reduce possum numbers | <input type="checkbox"/> |
| I am passionate about using aerial 1080 to reduce possum numbers                                   | <input type="checkbox"/> |
| It would be a big deal if a mistake was made while using aerial 1080 to reduce possum numbers      | <input type="checkbox"/> |
| My position about using aerial 1080 to reduce possum number tells others something about me        | <input type="checkbox"/> |
| Using aerial 1080 to reduce possum numbers is important to me                                      | <input type="checkbox"/> |
| Making decisions about how you use aerial 1080 to reduce possum numbers is complicated             | <input type="checkbox"/> |
| What others think about using aerial 1080 to reduce possum numbers tells me something about them   | <input type="checkbox"/> |
| I care a lot about a program which uses aerial 1080 to reduce possum numbers                       | <input type="checkbox"/> |
| Making decisions about how you use aerial 1080 to reduce possum numbers is difficult               | <input type="checkbox"/> |

**Q10: Attitude towards aerial 1080 baiting of possums**

How strongly do you agree or disagree with the following statements about using aerial 1080 to reduce possum numbers?

| Item                                                                        | Strongly agree           | Agree                    | Unsure/<br>neutral       | Disagree                 | Strongly disagree        |
|-----------------------------------------------------------------------------|--------------------------|--------------------------|--------------------------|--------------------------|--------------------------|
| I think aerial 1080 should be used to reduce possum numbers                 | <input type="checkbox"/> |
| I think using aerial 1080 to reduce possum numbers is the right thing to do | <input type="checkbox"/> |
| I believe it is wrong to use aerial 1080 to reduce possum numbers           | <input type="checkbox"/> |
| I think it would be good to use aerial 1080 to reduce possum numbers        | <input type="checkbox"/> |

**Q11: Which of the following statements best describes you?**

| Item                                                                                       | Describes me             |
|--------------------------------------------------------------------------------------------|--------------------------|
| I really think using aerial 1080 to reduce possum numbers is the right thing to do         | <input type="checkbox"/> |
| It doesn't really matter to me whether or not aerial 1080 is used to reduce possum numbers | <input type="checkbox"/> |
| I am not really sure if aerial 1080 to reduce possum numbers is the best way to go         | <input type="checkbox"/> |
| I haven't put much thought into using aerial 1080 to reduce possum numbers                 | <input type="checkbox"/> |
| I strongly believe that using aerial 1080 to reduce possum numbers is a bad thing to do    | <input type="checkbox"/> |

**Q12: Perceived advantages and disadvantages of using aerial 1080 to reduce possum numbers**

How strongly do you agree or disagree with the following statements about using aerial 1080 to reduce possum numbers?

| Item                                                                                                                  | Strongly agree           | Agree                    | Unsure/<br>neutral       | Disagree                 | Strongly disagree        |
|-----------------------------------------------------------------------------------------------------------------------|--------------------------|--------------------------|--------------------------|--------------------------|--------------------------|
| Aerial baiting with 1080 kills as many birds, if not more, than it might save                                         | <input type="checkbox"/> |
| Aerial baiting with 1080 is a risk to farm animals and pets                                                           | <input type="checkbox"/> |
| Aerial baiting with 1080 helps save cattle and farmed deer from Tb                                                    | <input type="checkbox"/> |
| Aerial baiting with 1080 is a risk to peoples' health                                                                 | <input type="checkbox"/> |
| Aerial baiting with 1080 is cost effective                                                                            | <input type="checkbox"/> |
| Aerial baiting with 1080 is the only practical method of pest control in areas that are rugged and difficult to reach | <input type="checkbox"/> |
| Aerial baiting with 1080 contaminates waterways                                                                       | <input type="checkbox"/> |
| Aerial baiting with 1080 is bad for recreational hunting                                                              | <input type="checkbox"/> |
| Aerial baiting with 1080 is a danger to wild foods                                                                    | <input type="checkbox"/> |

### Q13: Implementing aerial baiting

How strongly do you agree or disagree with the following statements about how aerial 1080 is used?

| Item                                                                                                       | Strongly agree           | Agree                    | Unsure/<br>neutral       | Disagree                 | Strongly disagree        |
|------------------------------------------------------------------------------------------------------------|--------------------------|--------------------------|--------------------------|--------------------------|--------------------------|
| I am completely opposed to repeated aerial baiting with 1080                                               | <input type="checkbox"/> |
| I can accept aerial baiting with 1080 as a one-off action to eradicate possums                             | <input type="checkbox"/> |
| I support aerial baiting with 1080 every few years to keep possum numbers down                             | <input type="checkbox"/> |
| I can tolerate the use of aerial baiting with 1080 until a practical and economic alternative is developed | <input type="checkbox"/> |
| I am completely opposed to using aerial 1080                                                               | <input type="checkbox"/> |
| I can tolerate the use of aerial 1080 until an alternative aerial poison is developed                      | <input type="checkbox"/> |

## Part B: Demographics and property characteristics

Are there possums on your property? \_\_\_\_\_

Are there possums in your area? \_\_\_\_\_

Do you trap or shoot possums? \_\_\_\_\_

Do you bait for possums? \_\_\_\_\_

What is your age? \_\_\_\_\_

What is your gender \_\_\_\_\_

How would you describe your property?

|                 |  |
|-----------------|--|
| High rise       |  |
| House           |  |
| Apartment       |  |
| Retail business |  |
| Factory         |  |
| Lifestyle block |  |
| Rural property  |  |

What is your highest level of formal education?

|                                   |  |
|-----------------------------------|--|
| Some or all of secondary school   |  |
| Certificate (1-6)                 |  |
| Certificate (5-7)                 |  |
| Bachelor degree                   |  |
| Post-graduate diploma/certificate |  |
| Post-graduate degree              |  |

**Thank you so much for participating in our survey**
