# Supplementary material
Source: MDPI journal article supplement (https://www.mdpi.com/2673-7159/2/4/38)
Supplement: s1 [file s1 › File S2.xlsx]

## Sheet: Sheet1
pest	Firstly, which area do you live in?	And is your property type...	We need to reduce the number of possums to protect our native birds and wildlife:Perceived benefits and costs of reducing possum numbers We are interested in your thoughts about reducing possum numbers. Using the scale of 1 to 5, where 1 is Strongly agree, 2 is Agree, 3 is Unsure/neutral, 4 is Disagree and 5 is Strongly disagree, how strongly do you agree or disagree with the following statements?	We need to reduce the number of possums to conserve our native plants and forests:Perceived benefits and costs of reducing possum numbers We are interested in your thoughts about reducing possum numbers. Using the scale of 1 to 5, where 1 is Strongly agree, 2 is Agree, 3 is Unsure/neutral, 4 is Disagree and 5 is Strongly disagree, how strongly do you agree or disagree with the following statement…	We need to reduce the number of possums to help eradicate bovine Tb:Perceived benefits and costs of reducing possum numbers We are interested in your thoughts about reducing possum numbers. Using the scale of 1 to 5, where 1 is Strongly agree, 2 is Agree, 3 is Unsure/neutral, 4 is Disagree and 5 is Strongly disagree, how strongly do you agree or disagree with the following statements?	We need to reduce the number of possums to prevent damage to plant nurseries:Perceived benefits and costs of reducing possum numbers We are interested in your thoughts about reducing possum numbers. Using the scale of 1 to 5, where 1 is Strongly agree, 2 is Agree, 3 is Unsure/neutral, 4 is Disagree and 5 is Strongly disagree, how strongly do you agree or disagree with the following statements?	We need to reduce the number of possums because they compete with livestock by eating pasture:Perceived benefits and costs of reducing possum numbers We are interested in your thoughts about reducing possum numbers. Using the scale of 1 to 5, where 1 is Strongly agree, 2 is Agree, 3 is Unsure/neutral, 4 is Disagree and 5 is Strongly disagree, how strongly do you agree or disagree with the followi…	We need to reduce the number of possums to prevent damage to orchards and gardens:Perceived benefits and costs of reducing possum numbers We are interested in your thoughts about reducing possum numbers. Using the scale of 1 to 5, where 1 is Strongly agree, 2 is Agree, 3 is Unsure/neutral, 4 is Disagree and 5 is Strongly disagree, how strongly do you agree or disagree with the following statement…	Possums have just as much of a right to life as other animals:Perceived benefits and costs of reducing possum numbers We are interested in your thoughts about reducing possum numbers. Using the scale of 1 to 5, where 1 is Strongly agree, 2 is Agree, 3 is Unsure/neutral, 4 is Disagree and 5 is Strongly disagree, how strongly do you agree or disagree with the following statements?	We need possums because they compete with other pests:Perceived benefits and costs of reducing possum numbers We are interested in your thoughts about reducing possum numbers. Using the scale of 1 to 5, where 1 is Strongly agree, 2 is Agree, 3 is Unsure/neutral, 4 is Disagree and 5 is Strongly disagree, how strongly do you agree or disagree with the following statements?	We need to have some possums to keep people employed in the fur industry:Perceived benefits and costs of reducing possum numbers We are interested in your thoughts about reducing possum numbers. Using the scale of 1 to 5, where 1 is Strongly agree, 2 is Agree, 3 is Unsure/neutral, 4 is Disagree and 5 is Strongly disagree, how strongly do you agree or disagree with the following statements?	rats1	rats2	rats3	rats4	rats5	rats6	rats7	Reducing the number of possums is the right thing to do:The need for action We are interested in how strongly you feel about the need for action to be taken to reduce possum numbers. Using as the same 1-5 scale, how strongly do you agree or disagree with the following statements?	I feel some responsibility for reducing the number of possums in my area:The need for action We are interested in how strongly you feel about the need for action to be taken to reduce possum numbers. Using as the same 1-5 scale, how strongly do you agree or disagree with the following statements?	I am prepared to take some kind of action to reduce possum numbers in my area:The need for action We are interested in how strongly you feel about the need for action to be taken to reduce possum numbers. Using as the same 1-5 scale, how strongly do you agree or disagree with the following statements?	It is important to work together to reduce the number of possums:The need for action We are interested in how strongly you feel about the need for action to be taken to reduce possum numbers. Using as the same 1-5 scale, how strongly do you agree or disagree with the following statements?	Nearly everyone I know thinks reducing possum numbers is the right thing to do:The need for action We are interested in how strongly you feel about the need for action to be taken to reduce possum numbers. Using as the same 1-5 scale, how strongly do you agree or disagree with the following statements?	Most people I know feel some responsibility for reducing the number of possums:The need for action We are interested in how strongly you feel about the need for action to be taken to reduce possum numbers. Using as the same 1-5 scale, how strongly do you agree or disagree with the following statements?	I think nearly everyone is prepared to take some kind of action to reduce possum numbers:The need for action We are interested in how strongly you feel about the need for action to be taken to reduce possum numbers. Using as the same 1-5 scale, how strongly do you agree or disagree with the following statements?	I am prepared to make sacrifices to reduce the number of possums in my area:The need for action We are interested in how strongly you feel about the need for action to be taken to reduce possum numbers. Using as the same 1-5 scale, how strongly do you agree or disagree with the following statements?	Most people are prepared to make sacrifices to reduce possum numbers:The need for action We are interested in how strongly you feel about the need for action to be taken to reduce possum numbers. Using as the same 1-5 scale, how strongly do you agree or disagree with the following statements?	Most people know we have to work together to reduce the number of possums in our area:The need for action We are interested in how strongly you feel about the need for action to be taken to reduce possum numbers. Using as the same 1-5 scale, how strongly do you agree or disagree with the following statements?	I think reducing possum numbers is rewarding:Involvement with reducing possum numbers We are interested in your opinions about reducing possum numbers. Again, using the same 1-5 scale, how strongly do you agree or disagree with the following statements?	The consequences are serious if we don't reduce possum numbers:Involvement with reducing possum numbers We are interested in your opinions about reducing possum numbers. Again, using the same 1-5 scale, how strongly do you agree or disagree with the following statements?	Reducing possum numbers is something I am passionate about:Involvement with reducing possum numbers We are interested in your opinions about reducing possum numbers. Again, using the same 1-5 scale, how strongly do you agree or disagree with the following statements?	It would be a big deal if mistakes were made while reducing possum numbers:Involvement with reducing possum numbers We are interested in your opinions about reducing possum numbers. Again, using the same 1-5 scale, how strongly do you agree or disagree with the following statements?	My position on reducing possum numbers tells others something about me:Involvement with reducing possum numbers We are interested in your opinions about reducing possum numbers. Again, using the same 1-5 scale, how strongly do you agree or disagree with the following statements?	Reducing possum numbers is important to me:Involvement with reducing possum numbers We are interested in your opinions about reducing possum numbers. Again, using the same 1-5 scale, how strongly do you agree or disagree with the following statements?	Making decisions about how to reduce possum numbers is complicated:Involvement with reducing possum numbers We are interested in your opinions about reducing possum numbers. Again, using the same 1-5 scale, how strongly do you agree or disagree with the following statements?	What others think about reducing possum numbers tells me something about them:Involvement with reducing possum numbers We are interested in your opinions about reducing possum numbers. Again, using the same 1-5 scale, how strongly do you agree or disagree with the following statements?	I care a lot about reducing possum numbers:Involvement with reducing possum numbers We are interested in your opinions about reducing possum numbers. Again, using the same 1-5 scale, how strongly do you agree or disagree with the following statements?	Making decisions about how to reduce possum numbers is difficult:Involvement with reducing possum numbers We are interested in your opinions about reducing possum numbers. Again, using the same 1-5 scale, how strongly do you agree or disagree with the following statements?	1080 helps to control possums, rats and stoats:Perceived advantages and disadvantages of using 1080 to reduce predator numbersUsing the scale of 1 to 5, where 1 is Strongly agree, 2 is Agree, 3 is Unsure/neutral, 4 is Disagree and 5 is Strongly disagree, how strongly do you agree with the following statements about using 1080 to reduce predator numbers?	1080 is a cruel and inhumane way to kill animals such as stoats and rats:Perceived advantages and disadvantages of using 1080 to reduce predator numbersUsing the scale of 1 to 5, where 1 is Strongly agree, 2 is Agree, 3 is Unsure/neutral, 4 is Disagree and 5 is Strongly disagree, how strongly do you agree with the following statements about using 1080 to reduce predator numbers?	Independent scientific studies have proven that native bird populations increase in areas where 1080 poison is used:Perceived advantages and disadvantages of using 1080 to reduce predator numbersUsing the scale of 1 to 5, where 1 is Strongly agree, 2 is Agree, 3 is Unsure/neutral, 4 is Disagree and 5 is Strongly disagree, how strongly do you agree with the following statements about using 1080 to…	1080 poison is more effective in saving birdlife than trapping the predators:Perceived advantages and disadvantages of using 1080 to reduce predator numbersUsing the scale of 1 to 5, where 1 is Strongly agree, 2 is Agree, 3 is Unsure/neutral, 4 is Disagree and 5 is Strongly disagree, how strongly do you agree with the following statements about using 1080 to reduce predator numbers?	1080 poison is biodegradable and at most takes several months to break down:Perceived advantages and disadvantages of using 1080 to reduce predator numbersUsing the scale of 1 to 5, where 1 is Strongly agree, 2 is Agree, 3 is Unsure/neutral, 4 is Disagree and 5 is Strongly disagree, how strongly do you agree with the following statements about using 1080 to reduce predator numbers?	The benefits to bird populations from increased nesting success following 1080 predator eradication far outweigh any side effects:Perceived advantages and disadvantages of using 1080 to reduce predator numbersUsing the scale of 1 to 5, where 1 is Strongly agree, 2 is Agree, 3 is Unsure/neutral, 4 is Disagree and 5 is Strongly disagree, how strongly do you agree with the following statements about…	1080 kills as many birds, if not more, than it might save:Perceived advantages and disadvantages of using 1080 to reduce predator numbersUsing the scale of 1 to 5, where 1 is Strongly agree, 2 is Agree, 3 is Unsure/neutral, 4 is Disagree and 5 is Strongly disagree, how strongly do you agree with the following statements about using 1080 to reduce predator numbers?	The suffering of predators due to 1080 poisoning far outweighs the benefits of increasing nesting success and native bird numbers:Perceived advantages and disadvantages of using 1080 to reduce predator numbersUsing the scale of 1 to 5, where 1 is Strongly agree, 2 is Agree, 3 is Unsure/neutral, 4 is Disagree and 5 is Strongly disagree, how strongly do you agree with the following statements about…	1080 is a risk to farm animals and pets:Perceived advantages and disadvantages of using 1080 to reduce predator numbersUsing the scale of 1 to 5, where 1 is Strongly agree, 2 is Agree, 3 is Unsure/neutral, 4 is Disagree and 5 is Strongly disagree, how strongly do you agree with the following statements about using 1080 to reduce predator numbers?	1080 is a risk to peoples' health:Perceived advantages and disadvantages of using 1080 to reduce predator numbersUsing the scale of 1 to 5, where 1 is Strongly agree, 2 is Agree, 3 is Unsure/neutral, 4 is Disagree and 5 is Strongly disagree, how strongly do you agree with the following statements about using 1080 to reduce predator numbers?	A benefit of using 1080 to reduce possum numbers is that stoats also can be killed if they feed on poisoned possums, rats and mice:Perceived advantages and disadvantages of using 1080 to reduce predator numbersUsing the scale of 1 to 5, where 1 is Strongly agree, 2 is Agree, 3 is Unsure/neutral, 4 is Disagree and 5 is Strongly disagree, how strongly do you agree with the following statements abou…
1	1	1	1	1	1	1	1	1	1	1	1								1	1	1	1	1	1	1	1	1	1	1	1	1	1	1	1	1	1	1	1	1	1	1	1	1	1	1	1	1	1	1
1	1	1	3	3	3	3	3	3	2	2	5								3	5	5	4	5	5	3	5	3	3	5	3	3	3	5	3	3	3	3	3	3	3	3	3	3	3	3	3	2	3	3
1	1	1	2	2	3	2	2	2	2	3	3								3	4	4	2	3	3	3	5	4	2	5	3	5	3	4	5	3	3	5	3	3	3	3	3	3	3	3	3	3	3	3
1	1	1	2	1	2	2	3	3	2	2	2								1	2	2	2	2	3	2	3	2	1	3	1	2	2	2	2	3	2	2	2	2	2	2	2	2	2	3	2	2	3	2
1	1	1	1	1	1	1	1	1	1	1	2								1	2	1	1	1	2	1	1	2	1	1	1	1	1	1	1	1	2	2	1	1	2	1	1	1	1	1	1	2	3	1
1	1	1	1	1	1	1	1	1	3	3	1								1	1	1	1	1	1	1	1	1	1	3	2	2	2	3	2	2	2	2	2	1	5	2	1	3	3	2	3	3	3	2
1	1	1	3	2	2	2	3	2	2	3	2								2	2	2	2	2	3	2	2	3	2	2	2	3	2	3	2	3	2	2	3	3	4	2	2	2	2	2	2	4	4	2
1	1	1	2	2	2	2	2	2	3	3	3								2	2	2	2	2	2	2	2	2	2	2	2	2	2	2	2	2	2	2	2	4	3	4	3	2	4	2	2	2	2	2
1	1	1	2	2	2	2	2	1	1	1	1								1	1	2	2	2	2	2	2	2	2	2	1	2	1	1	1	2	1	2	2	1	2	2	2	2	1	1	2	1	3	1
1	1	1	2	3	3	3	3	3	2	3	3								3	3	3	2	3	3	3	3	4	3	3	3	4	2	3	3	2	3	3	2	2	3	3	3	3	3	3	3	2	2	3
1	1	1	2	2	2	2	2	2	4	3	1								2	2	2	4	4	3	5	2	4	3	1	1	2	2	4	3	2	2	2	3	4	2	4	4	2	4	2	2	2	2	2
1	1	1	3	2	2	2	1	3	3	4	3								1	3	2	2	2	3	3	2	3	2	2	2	2	3	3	2	3	3	3	2	2	3	3	3	3	3	3	3	4	3	3
1	1	1	1	1	3	2	2	3	3	4	3								2	5	2	2	2	2	3	4	3	2	4	3	5	3	2	3	1	2	4	1	3	2	3	3	3	3	3	3	3	3	3
1	1	1	3	1	3	1	3	3	1	3	3								2	4	2	2	2	4	3	4	3	3	3	2	3	3	3	3	3	3	3	3	3	3	3	3	3	3	3	3	3	3	3
1	1	1	2	2	2	2	2	2	4	4	4								2	3	3	2	2	2	2	3	3	2	2	2	4	2	3	2	3	3	3	3	2	3	2	2	3	2	4	2	3	4	2
1	1	1	3	3	3	3	3	2	1	3	3								5	5	5	5	5	5	5	5	5	5	5	5	5	3	5	5	5	5	5	5	3	2	3	3	3	3	3	3	3	4	3
1	1	1	1	1	1	1	2	2	3	4	4								2	3	2	2	2	3	2	2	2	2	2	2	3	2	2	2	2	2	2	2	2	3	2	2	3	2	3	2	3	3	2
1	1	1	1	1	1	1	3	1	5	5	5								1	1	1	1	1	1	1	1	1	2	1	1	1	2	1	1	4	2	1	4	2	3	2	3	3	3	3	2	3	3	3
1	1	1	2	3	3	2	1	3	4	3	2								3	2	3	3	4	3	3	4	2	4	4	2	3	3	4	3	3	2	2	3	3	3	3	2	3	3	4	3	4	3	2
1	1	1	3	3	2	3	3	3	2	3	4								3	4	3	3	4	3	3	3	4	3	3	3	4	2	3	4	3	3	4	3	3	3	3	3	3	3	3	3	3	3	3
1	1	1	1	1	1	1	2	1	3	3	4								2	3	3	2	2	3	2	2	2	2	3	2	3	1	2	2	2	4	3	1	1	4	2	4	3	2	3	4	2	2	3
1	1	1	1	1	1	1	4	1	5	5	4								1	1	1	1	1	2	2	1	2	1	1	1	1	4	1	1	2	1	1	2	1	5	1	2	2	1	5	5	3	5	3
1	1	1	1	1	1	2	4	2	5	5	3								2	3	2	2	2	2	3	2	2	2	2	2	2	3	3	2	4	3	2	4	2	4	2	2	3	2	4	2	4	4	3
1	1	1	3	3	3	1	2	2	1	1	2								1	1	1	2	1	1	1	1	1	2	2	1	1	2	1	2	1	2	1	3	2	1	3	1	2	2	2	3	2	2	2
1	1	1	3	3	3	3	3	3	3	3	3								3	5	3	3	3	3	5	3	3	3	3	3	3	3	3	3	3	3	3	3	3	3	3	3	3	3	3	3	3	3	3
1	1	1	2	3	2	3	2	2	1	1	1								3	2	2	3	2	2	3	2	3	2	3	2	3	2	2	3	1	1	1	1	3	1	3	4	1	4	2	1	1	1	2
1	1	1	2	2	3	2	3	2	3	2	3								3	2	2	2	3	2	2	3	3	2	3	2	3	3	3	2	3	2	2	2	2	3	2	2	2	3	2	2	2	4	2
1	1	1	1	1	1	2	1	1	3	5	3								2	5	4	2	3	5	3	4	3	2	2	3	4	3	4	3	3	4	3	3	2	3	3	3	3	3	3	3	3	3	3
1	1	1	2	2	2	2	2	2	1	2	4								5	4	5	4	4	4	4	4	2	2	5	3	5	2	5	5	4	4	5	4	3	3	3	3	3	3	3	3	3	3	4
1	1	1	2	1	1	1	1	2	1	1	2								1	2	1	1	1	1	1	1	1	1	2	1	2	1	2	2	1	2	2	2	2	2	2	1	2	2	2	2	2	2	2
1	1	1	2	2	3	2	3	2	2	4	3								2	3	3	2	3	3	3	3	3	3	3	2	3	2	2	2	2	3	2	2	3	1	3	4	3	5	2	5	1	1	5
1	1	1	1	1	1	1	2	1	4	5	5								1	3	2	1	1	2	2	3	3	2	2	2	3	2	2	1	2	2	2	2	1	4	2	2	3	2	4	2	3	3	2
1	1	1	2	3	3	3	4	2	3	3	3								3	4	3	2	3	5	4	3	3	4	3	3	4	1	4	3	1	4	4	2	3	3	3	3	3	3	3	4	2	3	3
1	1	1	1	1	1	1	2	1	2	4	1								2	2	1	2	2	2	1	2	2	2	4	2	4	2	4	2	2	4	4	2	2	2	2	2	2	2	2	1	2	2	2
1	1	1	1	2	2	1	2	1	4	2	3								2	3	2	3	2	2	2	2	3	3	2	3	4	2	2	2	3	3	2	2	3	3	2	3	3	2	3	2	2	2	2
1	1	1	1	2	3	2	5	2	4	4	3								2	1	3	5	2	4	4	3	3	5	1	4	2	2	1	5	3	2	4	3	4	4	3	2	3	3	1	1	3	2	3
1	1	1	3	3	3	3	3	3	2	3	5								3	4	3	3	5	5	5	3	4	3	3	3	3	3	3	3	3	3	3	3	3	3	3	3	3	3	3	3	3	1	3
1	1	1	1	1	1	1	3	3	3	2	4								2	3	2	2	2	4	4	2	3	2	2	1	3	1	4	2	1	4	3	1	2	4	2	3	3	3	3	3	2	3	2
1	1	1	3	3	3	3	3	3	3	3	3								3	3	3	3	4	3	3	2	3	3	3	3	3	3	3	3	3	2	3	3	3	3	3	3	3	3	2	3	3	4	3
1	1	1	1	1	2	2	4	2	3	3	5								2	3	3	3	2	3	3	4	3	3	3	2	4	2	3	3	2	3	3	2	2	3	3	3	3	3	2	4	2	2	2
1	1	1	3	3	3	3	3	3	3	3	3								3	3	3	3	3	3	3	3	3	3	3	3	3	3	3	3	3	3	3	3	3	3	3	3	3	3	3	3	3	3	3
1	1	1	2	1	3	2	3	1	3	5	5								1	2	2	2	2	2	1	2	2	2	2	2	3	4	2	2	2	3	2	2	1	1	2	3	2	2	4	4	3	4	1
1	1	1	1	1	1	1	1	1	1	1	3								1	1	1	1	1	1	1	1	1	1	1	1	1	1	1	1	1	3	1	1	1	1	1	3	3	1	3	3	3	3	1
1	1	1	2	2	2	2	2	2	4	2	2								2	3	2	2	3	2	2	4	4	2	2	3	4	2	2	2	3	2	3	3	2	4	3	2	2	3	3	4	3	3	2
1	1	1	1	1	4	1	4	1	4	4	3								1	3	3	2	3	3	3	2	3	2	2	1	3	2	4	2	3	4	2	3	1	2	2	3	3	1	4	2	3	2	1
1	1	1	3	3	2	3	2	2	2	2	2								4	3	3	3	3	2	3	2	3	3	4	3	4	2	2	3	1	3	3	2	2	2	2	2	2	2	2	2	2	2	2
1	1	1	1	1	1	1	1	1	5	5	5								1	4	3	3	1	4	4	4	4	4	2	1	2	3	2	2	2	2	1	4	2	4	2	2	2	2	4	2	4	3	2
1	1	1	1	1	1	2	3	2	4	5	5								1	2	2	2	1	2	1	3	1	2	1	1	3	1	5	1	2	5	3	1	1	5	1	5	4	2	4	4	2	3	1
1	1	1	2	2	2	3	2	2	2	4	3								3	4	3	3	4	4	4	2	3	4	4	3	4	2	2	4	3	2	3	4	3	3	3	3	3	3	3	3	3	3	3
1	1	1	1	1	3	1	2	1	4	5	4								1	2	2	1	1	1	2	1	3	1	2	1	2	4	3	1	4	3	1	4	2	3	3	4	3	2	3	4	2	3	3
1	1	1	2	2	2	2	2	2	4	2	3								2	3	3	3	2	3	3	3	3	3	3	3	3	2	3	3	2	3	3	2	2	3	3	3	3	3	3	3	3	2	3
1	1	1	2	1	2	1	2	3	2	2	3								2	3	1	3	2	2	2	1	3	2	3	2	2	2	3	1	3	4	2	2	2	1	1	1	3	2	2	1	4	2	1
1	1	1	2	2	4	3	4	4	2	1	3								2	4	3	2	3	4	2	3	4	2	4	3	4	1	4	4	1	4	3	2	2	1	3	4	3	4	1	4	1	1	2
1	1	1	2	2	2	2	2	2	4	2	2								2	2	2	2	2	2	2	2	2	2	2	2	2	2	2	2	2	2	2	4	2	4	2	2	2	2	2	1	2	2	2
1	1	1	3	3	3	3	3	3	2	3	4								3	3	3	3	3	3	3	3	3	3	3	3	3	3	3	3	3	3	3	3	3	3	3	3	3	3	3	3	3	3	3
1	1	1	1	1	1	1	3	1	4	4	2								2	3	3	2	2	2	3	3	3	2	3	3	3	3	3	3	3	3	3	3	2	5	2	2	3	2	4	5	2	3	2
1	1	1	1	1	2	1	2	2	5	5	4								1	3	3	1	1	4	2	3	4	3	1	1	3	3	3	2	2	3	2	2	2	4	3	2	3	3	3	3	3	3	3
1	1	1	3	3	3	3	3	3	3	3	3								4	3	4	4	3	3	4	2	2	4	4	2	5	3	3	3	4	2	4	2	2	3	1	2	2	2	2	3	4	2	3
1	1	1	3	3	3	3	3	3	3	3	3								3	3	3	3	3	3	3	3	3	3	3	3	3	3	3	3	3	3	3	3	3	3	3	3	3	3	3	3	3	3	3
1	1	1	2	1	2	2	3	1	3	3	3								2	2	2	2	2	3	2	3	3	2	3	3	3	2	3	2	3	2	3	3	2	2	4	4	3	3	2	3	2	2	2
1	1	1	3	2	2	2	3	3	2	3	2								1	2	2	2	2	3	2	2	1	2	2	1	1	2	2	2	2	2	2	2	3	2	2	3	2	2	2	2	2	2	2
1	1	1	2	2	2	2	3	4	3	3	5								2	4	3	2	2	4	3	3	4	3	4	2	5	1	5	3	2	5	5	4	2	3	3	3	3	3	3	4	2	2	3
1	1	1	1	1	3	1	4	1	4	5	4								1	2	2	2	1	2	2	2	3	2	4	1	2	2	2	2	2	2	2	2	2	4	2	3	3	1	3	1	4	2	2
1	1	1	3	3	3	3	3	3	2	2	4								4	4	4	3	3	3	3	4	4	4	4	3	4	3	3	4	3	3	4	3	2	3	2	3	3	3	3	3	2	2	3
1	1	1	2	2	1	2	2	1	2	4	4								2	2	2	2	2	2	2	2	2	2	2	2	2	2	2	2	2	2	2	2	2	2	2	2	2	2	2	1	2	2	2
1	1	1	2	3	3	3	3	3	3	3	3								3	4	4	3	4	4	4	4	4	4	3	3	4	3	3	4	3	4	4	3	3	3	3	3	3	3	3	3	3	3	3
1	1	1	1	1	2	2	4	1	3	3	4								2	3	2	2	2	4	4	2	3	3	2	2	2	2	3	2	3	3	2	3	2	2	3	4	3	2	2	2	2	3	4
1	1	1	1	1	1	3	3	3	5	5	5								1	1	1	1	3	3	2	1	2	3	1	1	2	3	3	1	3	3	1	5	1	5	1	1	3	1	5	5	3	4	1
1	1	1	1	2	2	1	4	1	2	1	3								2	2	2	2	3	3	2	3	2	3	2	2	4	2	2	3	2	2	2	2	2	3	2	2	2	2	2	4	2	2	1
1	1	1	4	4	3	3	4	4	3	3	3								3	4	4	3	3	4	3	2	3	3	3	3	3	4	3	4	3	3	2	3	3	4	3	4	3	3	3	3	4	2	3
1	1	1	1	1	1	1	1	1	2	4	4								1	3	2	1	1	1	3	2	4	1	1	1	2	1	2	1	1	2	1	1	2	4	3	2	2	1	3	2	2	3	2
1	1	1	1	1	1	1	3	1	2	2	2								1	4	2	1	3	4	2	2	2	2	2	1	2	1	5	2	2	5	2	3	2	5	3	2	3	3	3	1	1	1	2
1	1	1	3	3	4	3	4	4	2	2	2								3	4	4	4	4	4	4	4	4	4	4	3	4	3	2	4	2	3	4	2	2	2	3	4	3	3	2	2	2	2	3
1	1	1	2	2	2	3	3	3	4	3	3								2	3	3	2	2	3	4	3	3	3	3	3	3	3	3	3	3	3	3	3	3	3	3	3	3	3	3	3	3	3	3
1	1	1	2	3	3	4	4	5	1	5	2								3	4	5	2	2	5	4	1	1	3	1	4	2	4	3	5	3	2	1	5	5	3	5	4	1	5	2	4	3	3	1
1	1	1	2	3	4	2	3	4	4	4	3								4	2	4	3	2	3	3	2	3	4	3	2	4	4	4	5	2	1	3	3	3	4	1	5	4	1	4	5	2	3	5
1	1	1	3	5	3	3	5	1	3	3	3								3	3	3	3	3	3	3	3	3	3	3	3	3	3	3	3	3	3	3	3	3	3	3	3	3	3	3	3	3	3	3
1	1	1	1	1	3	2	1	1	4	5	4								1	2	2	2	2	2	3	2	3	2	2	1	2	2	3	2	2	2	2	3	2	4	2	2	3	2	4	4	4	3	3
1	1	1	1	1	2	1	3	2	3	3	5								2	4	4	2	2	4	4	3	4	4	4	2	4	3	4	3	2	3	2	2	2	3	3	3	3	3	4	3	2	3	2
1	1	1	1	1	3	3	4	3	5	4	3								1	5	1	4	2	3	2	4	3	4	4	3	5	1	2	5	4	2	5	4	2	4	3	3	1	4	3	2	2	3	3
1	2	1	2	5	3	5	5	3	3	2	3								2	2	2	2	2	2	2	2	1	2	2	5	2	2	1	3	2	5	5	2	3	5	3	3	3	3	5	2	5	5	2
1	2	1	2	2	2	3	3	3	2	3	3								3	3	2	3	4	4	2	2	4	3	4	2	4	2	3	4	2	3	4	2	2	4	3	4	4	2	3	4	2	3	3
1	2	1	1	1	1	1	1	1	4	4	4								1	2	1	1	3	3	3	2	3	3	2	1	2	2	1	2	4	1	1	4	1	5	1	1	1	1	4	5	2	1	1
1	2	1	2	2	1	1	1	1	4	4	3								1	2	1	2	1	2	2	2	1	2	1	1	1	2	1	1	1	1	1	1	3	1	1	4	2	1	2	1	2	3	2
1	2	1	1	1	1	1	1	1	5	4	4								1	3	3	1	3	3	1	3	4	3	3	2	3	3	3	3	3	3	3	3	1	4	1	1	1	1	4	4	2	3	1
1	2	1	4	3	3	3	2	2	2	3	3								3	2	3	3	3	3	4	3	4	2	3	4	3	2	2	2	3	3	2	3	3	4	3	3	2	2	4	3	3	3	3
1	2	1	1	1	1	1	1	1	5	5	3								1	1	1	1	1	1	1	1	1	1	1	1	1	1	1	1	1	1	1	1	1	1	1	1	1	1	1	1	1	1	1
1	2	1	2	3	3	2	4	2	4	3	3								3	3	2	3	4	4	3	3	3	4	3	3	4	4	3	4	3	4	3	3	2	3	1	2	3	2	4	2	3	2	3
1	2	1	2	2	2	2	2	2	3	3	3								2	2	2	2	2	3	4	3	4	2	2	2	5	3	4	3	4	2	4	3	3	3	3	3	3	3	2	3	3	3	3
1	2	1	1	1	3	2	4	3	4	4	4								1	4	2	2	1	3	4	3	2	2	2	4	4	3	2	2	2	4	2	3	3	3	3	3	3	3	3	3	3	4	3
1	2	1	2	2	2	2	2	4	4	3	3								2	4	3	2	3	3	3	3	3	2	2	2	4	2	5	3	4	4	4	4	2	4	3	3	3	3	3	3	2	2	3
1	2	1	2	1	1	2	3	2	3	5	3								1	3	3	3	2	3	2	4	4	3	2	1	2	4	3	2	2	3	2	2	3	4	2	3	2	1	3	4	3	4	3
1	2	1	1	2	1	1	2	1	2	3	3								2	1	2	2	3	2	3	1	3	3	3	2	2	1	2	2	2	3	3	2	2	3	3	3	3	3	3	3	3	3	2
1	2	1	1	2	2	2	3	2	2	3	5								2	3	3	2	2	3	2	2	2	3	3	2	3	2	4	3	2	3	3	2	2	3	2	3	3	3	3	3	1	3	2
1	2	1	2	3	3	3	3	2	1	2	3								4	5	4	4	4	4	4	4	4	4	3	4	5	1	4	4	3	4	3	3	4	1	3	3	3	3	2	2	2	2	2
1	2	1	1	1	1	2	3	1	5	5	2								1	4	1	3	2	3	2	2	2	3	3	1	3	3	3	2	4	3	3	4	1	5	1	1	4	1	5	5	2	5	1
1	2	1	1	1	2	2	1	2	2	4	5								2	3	2	2	2	3	3	4	3	2	5	1	4	2	4	4	2	4	3	2	2	4	3	3	3	3	2	3	2	2	2
1	2	1	1	1	1	1	3	2	2	3	2								2	3	2	2	2	3	3	2	3	2	3	2	3	2	3	2	2	2	2	2	2	3	3	3	3	3	3	3	3	2	3
1	2	1	1	2	3	2	3	3	3	3	3								2	3	2	2	2	4	3	3	4	4	2	2	3	2	3	2	2	4	2	2	2	3	3	3	3	4	3	4	2	3	2
1	2	1	3	3	3	3	3	3	3	3	2								2	2	2	2	2	2	2	2	2	3	4	3	3	3	3	3	3	3	3	3	3	3	2	3	3	3	3	2	3	3	3
1	2	1	1	1	1	4	4	1	5	5	5								1	2	1	1	1	2	1	1	2	2	3	1	1	4	2	1	4	3	1	4	1	4	1	2	2	1	4	5	4	5	3
1	2	1	2	2	2	3	3	2	4	4	4								2	3	3	2	2	3	3	3	3	3	2	2	3	3	2	2	2	2	3	2	2	4	2	2	3	2	4	4	3	3	3
1	2	1	2	1	1	3	2	2	3	2	2								2	2	2	2	3	4	4	2	4	2	4	3	3	3	4	2	2	4	3	2	2	4	3	3	3	3	3	4	3	3	2
1	2	1	2	3	3	3	3	2	4	5	2								2	3	3	2	2	5	1	2	2	2	5	5	5	5	5	5	5	5	5	5	1	3	3	1	3	3	3	3	3	3	3
1	2	1	1	1	1	1	4	1	5	5	5								1	3	2	2	1	3	2	1	3	2	1	1	1	3	3	1	4	2	1	4	1	5	1	1	1	1	5	5	5	5	1
1	2	1	3	4	3	4	3	4	3	3	4								4	3	4	4	4	3	3	3	4	3	3	3	3	3	4	3	4	3	2	4	3	3	3	3	3	3	3	3	3	3	3
1	2	1	1	1	3	3	3	1	3	4	4								2	4	4	2	3	4	4	3	3	3	4	2	4	3	3	4	3	3	4	3	2	4	2	3	2	3	4	4	4	4	2
1	2	1	1	1	3	2	3	2	5	2	5								1	5	5	5	2	4	4	4	4	4	3	1	5	4	3	4	3	4	5	4	3	3	3	2	4	1	3	3	3	3	3
1	2	1	1	1	3	2	1	2	4	4	5								1	2	1	1	2	4	4	1	4	4	2	1	2	3	2	2	3	1	2	4	1	3	3	3	4	3	4	2	3	2	3
1	2	1	2	2	3	3	3	3	2	3	4								3	4	4	3	4	4	4	4	5	3	3	3	4	3	4	3	2	4	3	2	3	3	3	3	3	3	3	3	3	3	3
1	2	1	1	1	4	1	2	2	3	3	1								2	4	3	2	2	4	3	5	4	2	5	2	5	2	4	4	4	2	4	2	2	2	2	3	4	2	2	3	2	2	2
1	2	1	3	3	3	2	2	2	2	3	2								2	4	3	2	2	4	3	3	4	4	3	3	4	2	4	4	2	4	4	3	2	3	2	2	3	2	3	3	3	4	3
1	2	1	1	1	1	1	3	1	5	5	5								1	2	2	1	1	5	3	2	3	1	2	1	2	2	2	2	2	3	2	2	1	4	2	2	3	2	3	4	3	3	1
1	2	1	1	1	3	1	2	1	3	5	4								1	2	1	2	3	3	2	2	3	4	2	2	3	3	4	2	4	4	3	4	2	4	3	3	3	3	3	2	2	3	3
1	2	1	2	3	3	3	3	3	1	3	3								3	4	4	2	3	3	2	3	2	2	4	2	4	1	4	4	1	2	3	1	4	1	1	4	2	4	1	1	1	1	3
1	2	1	2	2	2	2	4	3	4	4	2								2	3	2	2	2	3	2	2	2	2	2	2	3	2	3	2	3	2	2	3	2	4	3	3	3	3	2	4	2	2	3
1	2	1	1	1	1	2	4	1	4	5	3								1	3	2	1	2	2	2	2	3	2	2	2	2	3	2	1	3	3	2	3	2	4	3	2	3	2	4	2	3	3	2
1	2	1	3	3	3	3	3	3	3	3	3								3	3	3	3	3	3	3	3	3	3	3	3	3	3	3	3	3	3	3	3	3	3	3	3	3	3	3	3	3	3	3
1	2	1	2	2	1	3	3	2	5	4	2								2	3	3	2	2	4	3	3	3	4	2	2	3	3	3	2	2	3	2	2	1	5	2	2	2	2	3	2	4	2	1
1	2	1	1	1	2	2	4	3	4	4	3								2	2	2	2	3	3	3	2	3	2	3	2	3	2	3	2	2	3	2	2	2	5	2	3	2	3	3	4	3	3	1
1	2	1	3	3	2	2	3	2	3	2	3								2	3	3	2	3	3	2	3	3	3	3	3	4	3	3	3	2	3	4	2	3	3	3	3	3	3	3	3	3	2	3
1	2	1	1	1	1	1	4	1	3	3	5								2	3	3	3	2	3	3	3	3	3	3	2	3	1	3	3	2	3	3	2	3	1	3	5	5	5	1	3	1	1	3
1	2	1	1	1	1	1	1	1	4	4	4								1	3	2	1	2	4	2	2	1	4	2	1	4	3	3	2	3	4	2	2	1	4	1	1	1	1	1	1	5	4	1
1	2	1	2	2	2	2	2	2	4	3	3								2	3	2	2	3	2	3	2	3	2	3	3	3	3	3	3	3	3	3	3	2	3	3	3	3	3	2	3	3	3	3
1	2	1	3	3	3	3	3	3	3	3	3								2	4	4	3	4	4	4	4	4	3	3	3	4	3	4	4	3	4	3	2	3	3	3	3	3	3	3	3	3	3	3
1	2	1	2	2	2	2	3	3	3	4	3								4	2	4	2	3	2	4	3	2	3	4	2	2	3	3	2	3	3	2	4	3	2	3	1	3	3	1	2	4	3	2
1	2	1	1	1	3	3	4	3	4	5	4								1	3	1	2	1	1	2	1	2	1	2	1	3	3	2	2	3	2	2	3	1	4	2	2	3	2	4	4	4	4	1
1	2	1	1	1	3	2	4	3	5	5	5								2	2	3	2	2	3	2	2	2	2	2	2	3	2	2	2	2	2	2	2	2	3	3	2	3	2	3	3	3	4	3
1	2	1	2	3	2	2	3	2	2	4	5								2	2	2	2	2	2	2	2	2	2	2	3	3	2	3	3	2	3	3	3	3	3	3	3	3	2	2	3	2	2	2
1	2	1	2	3	2	1	2	2	2	2	2								2	1	2	2	1	2	1	1	1	2	2	2	2	1	1	1	2	2	2	1	2	2	2	2	2	1	1	2	1	1	1
1	2	1	4	3	4	4	4	4	1	2	2								5	4	5	3	5	5	5	5	4	4	5	4	5	1	5	5	1	1	4	1	5	1	5	3	5	5	1	1	1	1	5
1	2	1	1	1	1	1	1	1	5	1	3								1	4	2	2	3	3	2	1	2	3	1	2	3	2	3	1	2	2	1	4	1	5	1	1	2	1	5	4	3	5	1
1	2	1	1	1	2	4	3	3	2	3	4								2	5	5	3	2	5	4	5	4	2	2	2	5	1	4	3	1	4	4	1	2	3	3	3	3	3	3	5	2	3	3
1	2	1	1	1	1	1	1	1	3	5	4								1	5	5	2	2	5	5	5	5	5	1	1	5	4	3	3	5	5	5	4	1	4	1	1	2	2	4	5	3	2	2
1	2	1	1	1	1	2	4	1	5	5	5								1	1	1	1	1	1	1	1	1	1	2	1	2	3	2	2	1	2	2	2	2	4	2	3	2	2	2	3	2	4	2
1	2	1	2	3	2	2	3	3	2	2	3								2	3	3	3	2	2	2	3	3	3	2	2	3	3	3	3	3	3	2	3	3	3	2	3	3	3	2	3	2	2	3
1	2	1	1	1	2	1	1	1	3	1	4								1	1	1	2	1	2	1	1	1	1	2	1	3	1	3	2	2	1	1	4	2	1	4	4	2	3	1	3	3	2	3
1	2	1	2	2	3	3	2	3	2	3	3								3	4	4	3	4	4	4	4	4	3	4	3	4	3	4	4	3	4	4	3	3	3	3	3	3	3	3	3	3	3	3
1	2	1	2	2	3	2	2	2	2	2	2								2	4	4	2	4	4	4	3	3	3	2	2	5	2	3	4	2	2	4	2	2	2	4	4	4	4	2	2	2	1	2
1	2	1	2	2	2	2	2	2	2	2	2								2	2	2	1	2	3	2	3	2	2	3	1	2	2	2	3	1	3	2	2	2	3	2	3	3	2	3	2	3	3	3
1	2	1	2	2	2	3	3	2	2	3	5								2	4	3	2	3	3	3	3	3	3	4	3	4	1	3	4	1	3	4	1	3	3	3	3	3	4	3	2	1	1	3
1	2	1	2	2	3	2	3	2	3	3	4								2	3	3	3	2	2	2	3	4	4	2	2	3	2	4	3	2	3	3	3	2	2	3	3	2	3	2	2	2	2	3
1	2	1	1	1	1	1	3	1	4	3	1								2	3	1	1	2	1	1	1	1	1	3	1	2	2	2	1	1	2	1	3	1	4	2	1	1	1	1	1	1	1	2
1	2	1	3	3	3	3	4	3	1	4	5								3	4	3	3	3	4	3	4	3	3	4	3	4	2	3	3	2	2	3	1	3	1	3	4	3	5	1	1	3	3	3
1	2	1	1	1	2	2	2	2	3	4	3								2	4	1	2	2	3	2	2	2	2	2	1	2	2	2	2	2	2	1	2	2	4	3	3	3	3	3	3	3	1	3
1	2	1	1	1	1	1	1	1	5	5	5								1	5	3	1	1	3	3	3	5	3	1	1	3	5	1	1	5	3	1	5	1	5	3	1	1	1	5	1	5	5	1
1	2	1	3	3	3	3	3	3	3	3	3								3	3	3	3	3	3	3	3	3	3	3	3	3	3	3	3	3	3	3	3	3	3	3	3	3	3	3	3	3	3	3
1	2	1	2	2	2	2	2	2	2	2	2								2	2	2	2	2	2	2	2	2	2	1	2	2	3	2	2	3	2	2	3	2	3	2	2	2	2	2	2	2	2	2
1	2	1	3	4	2	4	5	3	3	4	5								2	4	2	2	2	3	2	2	3	2	3	3	4	2	2	3	2	2	3	2	2	2	3	4	3	3	2	3	2	1	3
1	2	1	1	1	1	1	3	2	2	4	4								1	3	3	1	2	1	2	2	2	2	2	1	3	1	1	2	2	1	2	2	1	4	2	2	2	3	4	4	3	4	2
1	2	1	1	1	1	1	1	1	5	1	5								1	1	3	1	1	1	1	3	1	1	1	1	1	2	2	1	4	1	1	4	1	5	1	1	1	1	2	1	1	5	1
1	2	1	2	1	3	2	4	2	4	4	2								2	4	4	2	2	3	3	3	3	2	2	2	4	4	4	3	4	4	4	2	2	3	2	3	2	2	3	4	3	3	2
1	2	1	2	3	1	1	2	3	3	2	3								3	2	3	3	2	3	1	1	2	2	3	2	3	1	3	3	3	3	2	3	1	3	3	2	3	2	2	3	3	2	1
1	2	1	2	3	2	4	3	2	2	4	4								3	3	3	3	4	3	3	3	3	3	4	3	4	2	3	3	2	3	3	2	4	1	1	4	4	4	1	1	1	1	4
1	2	1	1	1	2	2	4	3	3	4	3								2	2	3	2	2	3	2	2	4	2	3	2	2	2	2	2	3	2	2	3	2	3	2	2	2	2	4	4	2	4	2
1	2	1	1	1	2	1	2	1	4	3	3								2	3	2	2	3	3	3	2	3	3	3	3	2	3	3	2	3	3	2	2	2	2	3	2	3	3	2	3	2	2	2
1	2	1	2	2	2	2	2	2	2	2	4								2	4	4	3	4	3	2	4	2	2	5	2	5	3	3	4	4	4	3	3	3	3	4	3	3	3	3	3	3	3	3
1	2	1	1	1	3	1	4	3	3	4	4								2	4	5	3	2	4	4	3	4	3	2	2	4	2	4	3	3	5	4	2	3	3	3	3	3	3	3	3	3	3	3
1	2	1	1	1	3	1	1	1	4	4	2								1	2	2	1	1	1	1	2	1	1	2	2	2	2	2	2	2	2	2	2	2	3	2	2	3	2	3	2	4	4	3
1	8	2	2	2	2	2	2	2	2	2	2								2	2	2	2	2	2	2	2	2	2	2	2	2	2	2	2	2	2	2	2	2	2	2	2	2	2	2	2	2	2	2
1	8	2	2	2	2	2	2	2	2	2	2								2	2	2	2	2	2	2	2	2	2	2	2	2	2	2	2	2	2	2	2	2	4	2	2	2	2	2	2	2	2	2
1	8	2	2	2	2	2	2	2	2	2	2								3	4	3	3	3	4	3	3	3	3	3	2	3	2	3	3	2	3	3	2	3	3	2	3	3	3	3	3	2	2	3
1	8	2	2	2	2	2	2	2	2	2	2								2	2	2	2	2	2	2	2	2	2	2	2	2	2	2	2	2	2	2	2	2	3	2	2	2	2	2	3	2	2	2
1	8	2	2	2	2	2	2	2	2	2	2								2	2	2	2	2	2	2	2	2	2	2	2	2	2	2	2	2	2	2	2	2	4	2	2	3	2	3	2	4	3	2
1	8	2	2	2	2	2	2	2	2	2	2								1	1	1	1	1	1	1	1	1	1	3	1	1	1	1	1	1	1	1	1	2	4	2	2	2	2	3	2	2	2	2
1	8	2	1	1	1	1	1	1	1	1	1								1	1	1	1	1	1	1	1	1	1	1	1	1	1	1	1	1	1	1	1	1	5	4	2	3	3	4	2	4	2	1
1	8	1	2	2	1	2	2	2	3	2	2								2	3	3	2	2	2	2	2	2	2	3	2	3	3	3	3	4	3	3	4	2	3	3	3	3	3	3	3	2	2	2
1	8	1	1	1	1	1	1	1	5	5	5								1	1	1	1	1	2	2	1	2	2	1	1	1	3	2	1	4	2	1	4	2	5	2	2	4	2	4	5	4	4	2
1	8	1	1	1	1	1	1	1	5	5	5								1	2	1	1	2	4	4	1	3	3	1	1	2	2	1	1	2	4	1	2	3	1	4	4	5	4	1	2	1	1	4
1	8	1	1	1	4	3	4	3	3	4	3								2	3	3	2	3	3	3	3	3	3	2	1	3	2	3	3	2	3	2	2	3	2	3	3	4	3	3	3	2	2	2
1	8	1	2	2	3	2	2	2	4	4	4								2	3	3	2	2	2	3	3	3	3	2	2	3	3	3	2	4	3	3	3	3	3	3	3	3	3	3	3	3	3	3
1	8	1	2	2	2	2	2	3	3	3	2								2	3	3	2	2	2	3	3	3	2	3	3	4	2	3	3	2	2	3	2	2	2	3	3	3	3	3	3	2	2	2
1	8	1	1	1	1	1	1	2	3	5	5								1	3	2	1	1	3	3	1	3	3	1	1	1	4	3	1	4	5	1	5	1	5	1	1	1	1	3	5	3	4	1
1	8	1	4	5	5	2	5	2	3	5	4								4	5	4	4	2	3	3	4	3	4	2	5	5	2	4	4	1	4	5	4	4	1	5	3	4	4	2	2	2	4	3
1	8	1	2	2	2	1	2	1	3	4	1								2	3	3	1	1	4	4	4	4	3	3	3	5	2	4	4	2	2	4	2	3	3	2	3	3	3	4	4	2	3	2
1	8	1	1	1	3	1	3	1	3	4	3								1	3	3	1	1	2	1	2	3	1	2	2	3	2	2	2	1	2	3	2	1	4	2	2	2	2	2	2	4	4	2
1	8	1	2	2	2	2	4	2	3	3	4								2	3	3	2	2	3	3	3	2	3	3	2	3	2	2	2	2	2	2	2	2	2	2	2	2	2	4	3	2	3	2
1	8	1	1	1	1	1	3	1	5	5	1								1	5	5	1	3	3	3	5	3	2	1	2	1	1	2	1	4	2	1	5	5	1	3	3	5	3	3	3	1	1	3
1	8	1	2	1	2	2	2	2	3	3	2								2	4	2	2	5	4	3	2	4	4	4	3	5	2	4	4	2	4	4	2	3	4	3	3	3	3	3	3	3	2	3
1	8	1	2	2	3	2	2	2	3	4	3								2	3	3	2	3	3	3	3	3	3	3	2	3	3	3	3	3	3	3	3	2	2	3	3	3	3	2	3	2	2	2
1	8	1	2	2	2	3	4	3	2	2	2								2	1	1	2	2	2	4	1	2	1	1	2	1	2	2	2	2	2	2	1	5	1	3	5	2	3	1	1	1	1	3
1	8	1	2	2	3	2	3	3	3	4	4								3	2	3	2	3	3	2	3	3	2	3	2	4	2	4	4	3	4	4	3	2	3	3	3	3	3	3	3	2	2	3
1	8	1	2	2	3	2	2	1	2	3	2								3	3	2	2	2	3	2	2	2	2	2	2	3	2	3	2	3	3	3	3	3	1	3	3	4	3	2	3	1	1	3
1	8	1	1	3	2	2	4	3	1	1	1								3	3	3	3	3	4	3	3	4	4	4	3	4	3	2	4	2	3	3	1	3	3	3	2	3	3	3	3	3	2	3
1	8	1	2	2	3	1	2	2	3	3	3								2	3	3	2	3	2	3	3	3	2	3	2	3	3	3	3	2	2	3	2	2	5	3	4	5	4	4	4	2	2	3
1	7	2	1	1	2	3	4	2	4	5	5								1	1	1	1	1	1	3	2	3	1	2	1	1	1	3	1	4	4	1	5	2	2	1	2	2	2	5	2	2	3	2
1	7	2	2	2	3	4	4	4	2	4	3								2	4	2	2	4	5	5	4	5	5	4	3	5	1	1	4	2	2	4	2	2	1	3	2	3	4	3	5	1	1	3
1	7	2	1	1	1	1	1	1	5	5	5								1	3	2	1	4	4	5	3	5	3	3	1	4	2	3	4	2	3	3	2	1	5	2	1	3	2	4	5	2	3	3
1	7	2	1	3	3	3	3	3	4	3	3								1	2	1	4	3	4	4	3	4	4	3	1	4	3	4	2	1	5	2	1	1	4	1	5	2	1	5	5	3	4	2
1	7	1	3	3	3	3	3	3	3	3	3								3	3	3	3	4	4	4	3	2	3	4	4	3	2	3	5	3	3	5	3	3	4	3	3	3	4	4	3	4	3	2
1	7	1	1	1	2	1	1	2	3	3	3								3	4	2	3	3	5	3	4	5	3	3	3	5	2	4	5	2	4	5	2	2	1	5	5	3	5	1	5	1	2	2
1	7	1	1	1	2	2	3	1	3	3	4								2	2	2	2	4	4	1	3	3	2	3	2	3	1	3	3	3	3	3	2	3	3	3	4	4	4	2	3	2	2	2
1	7	1	2	2	3	2	2	2	3	2	3								3	3	3	2	2	2	3	3	3	2	4	2	4	1	2	3	2	2	4	2	3	3	3	3	3	4	3	2	1	1	3
1	7	1	1	1	2	2	2	2	5	5	4								1	3	3	1	2	3	3	3	3	3	2	1	2	3	3	2	3	3	2	3	1	5	1	1	2	1	5	5	5	4	1
1	7	1	2	2	2	2	4	2	3	3	3								2	4	3	2	5	5	5	3	5	4	3	3	4	1	3	3	5	2	3	5	5	1	5	5	5	5	1	1	1	1	3
1	7	1	1	1	1	1	1	1	5	5	5								1	3	2	1	1	2	2	2	3	2	2	1	2	2	2	2	3	3	2	2	2	4	2	2	3	2	3	2	3	3	3
1	7	1	2	1	1	4	4	1	3	3	4								3	3	3	2	2	2	3	2	4	2	3	2	3	3	2	2	3	2	3	3	3	2	4	4	4	4	2	4	2	4	3
1	7	1	2	2	3	3	3	3	2	3	3								3	4	3	2	3	5	3	4	3	2	5	3	5	3	4	5	2	5	5	2	2	3	3	3	3	3	2	3	3	3	3
1	7	1	3	4	3	4	3	4	1	3	3								4	4	4	3	3	3	3	4	3	3	5	5	5	3	3	5	3	2	5	5	3	1	3	5	4	4	1	4	1	1	4
1	7	1	2	2	4	4	2	2	3	2	4								2	2	3	3	3	3	4	2	3	3	3	2	2	3	2	2	3	3	3	3	2	4	3	2	3	2	3	4	3	3	2
1	7	1	2	2	3	2	4	4	4	4	3								2	5	4	3	3	5	4	4	4	3	4	2	4	1	4	2	4	4	3	4	5	2	4	4	5	4	1	4	2	1	4
1	7	1	1	2	3	2	2	2	5	1	5								1	4	3	2	2	3	3	3	2	3	3	2	3	1	3	2	2	3	3	2	2	3	4	3	3	3	2	4	1	1	3
1	7	1	2	2	2	2	2	2	3	2	2								2	2	2	2	2	4	4	2	4	4	2	2	2	2	2	2	2	2	2	2	2	4	4	4	2	4	2	4	2	3	2
1	7	1	1	1	1	1	2	1	4	4	4								1	1	1	1	1	1	1	1	1	1	1	1	2	1	1	1	2	1	1	1	2	5	3	2	3	2	3	2	3	1	2
1	7	1	1	2	3	4	4	4	3	4	2								2	3	2	2	2	3	3	4	3	2	2	2	3	1	4	2	2	4	3	2	2	3	3	3	3	4	3	3	2	3	2
1	7	1	1	1	1	1	1	1	4	4	5								1	2	3	4	1	3	1	3	3	3	1	1	2	2	3	1	2	3	1	2	1	1	3	4	1	3	1	1	1	1	1
1	7	1	1	1	3	2	2	2	1	3	3								3	2	3	2	4	4	4	2	4	3	4	3	5	1	5	4	1	5	4	1	3	2	3	3	4	3	3	2	2	1	3
1	7	1	1	2	3	2	4	3	3	5	5								2	2	1	1	2	4	4	2	3	2	2	2	2	1	3	2	1	3	2	2	2	3	3	3	2	3	4	3	2	2	3
1	7	1	1	1	2	2	3	2	4	5	4								1	2	2	2	1	2	2	2	3	2	1	2	1	3	2	1	3	3	1	3	2	4	2	2	2	2	3	2	2	2	2
1	3	2	1	1	2	2	2	3	5	5	5								2	4	4	1	3	2	2	3	1	3	2	1	1	2	3	1	4	2	1	4	1	5	1	1	5	1	4	1	3	5	2
1	3	2	2	2	2	2	2	2	4	4	4								1	2	2	1	1	1	1	2	1	1	3	1	2	4	1	1	2	2	1	2	2	2	5	4	5	5	1	4	1	2	4
1	3	2	2	2	1	1	1	1	2	4	4								2	2	2	2	3	2	3	2	2	2	3	3	2	2	2	2	2	1	2	2	3	2	3	3	3	3	3	3	2	2	3
1	3	2	1	1	1	1	2	1	5	5	3								1	2	2	1	1	2	2	1	1	1	2	1	2	3	2	2	3	2	2	3	1	5	2	2	2	3	4	5	3	3	1
1	3	2	1	1	1	1	2	1	5	5	5								1	1	1	1	3	1	1	1	3	1	1	1	1	3	2	1	1	1	1	1	1	4	1	2	3	1	5	1	2	5	2
1	3	2	1	1	1	1	4	1	4	5	5								1	1	1	1	1	1	1	1	1	1	1	1	1	1	1	1	1	1	1	1	2	4	3	4	3	3	1	3	2	1	2
1	3	2	1	1	1	3	4	1	4	5	4								1	5	2	1	2	3	3	5	4	3	4	1	3	1	4	2	1	4	2	1	2	4	2	2	3	3	2	4	1	1	2
1	3	2	1	1	1	1	5	1	5	5	4								1	1	1	1	1	1	1	2	1	1	3	2	2	1	3	2	2	3	1	1	3	3	3	3	3	2	3	3	2	2	3
1	3	2	1	1	2	3	5	3	5	5	5								1	2	2	2	2	2	2	2	2	1	3	1	2	3	3	2	4	3	2	4	1	5	3	2	3	2	4	4	4	4	3
1	3	2	1	1	1	2	3	1	4	4	4								1	1	1	1	1	2	2	2	2	2	2	2	3	1	2	2	1	2	2	1	2	1	3	3	3	3	3	4	2	2	2
1	3	2	1	1	1	1	2	1	5	5	4								1	4	3	1	1	4	2	3	4	2	3	1	3	2	3	1	2	2	2	2	2	4	3	4	2	4	3	4	2	2	2
1	3	2	3	3	5	3	3	3	5	5	3								3	5	3	3	5	5	5	4	5	5	3	5	3	1	5	3	5	1	3	3	3	1	5	4	5	5	2	5	1	1	3
1	3	2	1	1	1	5	5	4	5	5	5								1	1	1	1	1	1	1	1	1	1	3	1	2	1	2	2	1	3	1	1	1	1	1	5	5	5	1	1	1	1	1
1	3	2	5	1	1	3	4	3	5	1	4								1	1	1	1	1	1	3	1	2	1	1	2	1	3	2	1	4	4	1	4	1	2	1	1	2	1	5	5	1	5	1
1	3	2	2	2	2	2	4	2	2	4	4								2	5	2	2	4	4	3	2	3	2	4	3	4	2	4	4	2	4	4	2	3	3	3	3	3	3	3	3	3	3	3
1	3	2	1	1	1	3	1	1	3	4	3								1	1	1	1	1	1	3	1	1	1	2	4	1	2	4	1	2	4	1	2	1	5	1	1	1	1	4	5	4	4	2
1	3	2	1	1	3	1	1	1	5	5	5								1	1	1	1	1	1	2	1	2	3	1	2	1	2	1	1	5	2	1	5	1	5	4	3	2	4	3	4	4	1	2
1	3	2	2	2	2	4	4	2	2	3	2								2	2	2	2	2	2	2	2	2	2	2	2	3	1	3	2	2	3	2	2	2	1	4	4	1	4	2	4	2	2	2
1	3	2	1	1	1	1	1	1	5	5	5								1	1	1	1	1	1	1	1	1	1	1	1	2	1	3	1	5	2	1	5	1	5	2	2	2	1	4	5	3	3	1
1	3	2	1	1	1	3	1	2	4	5	5								1	2	2	2	2	2	3	2	2	2	2	2	4	4	4	3	2	4	2	4	2	4	2	1	2	1	4	4	3	5	2
1	3	2	5	5	5	5	5	5	4	5	1								2	1	1	2	2	2	2	4	1	2	2	4	2	1	2	2	4	3	2	4	5	1	5	5	5	5	1	4	1	1	5
1	3	2	1	1	2	2	3	2	4	4	4								1	1	1	1	2	2	2	2	2	2	2	1	2	3	2	1	2	2	1	4	3	4	1	2	2	2	4	4	2	3	1
1	3	2	5	5	5	5	5	5	1	1	1								3	1	1	5	5	3	2	5	3	1	5	5	5	1	1	5	1	5	5	3	5	1	5	5	5	5	1	1	1	1	5
1	3	2	1	1	1	1	3	1	1	5	3								1	1	1	1	1	1	1	1	1	1	1	1	3	1	5	1	1	5	1	1	1	1	5	1	1	1	1	4	1	4	1
1	3	2	1	1	2	4	4	3	2	5	1								1	1	1	1	1	1	3	3	3	1	3	1	3	1	2	1	1	2	1	1	2	4	1	2	1	1	3	5	2	4	3
1	3	2	5	5	4	4	4	5	3	1	4								1	2	1	1	4	3	4	1	3	1	1	1	1	3	1	1	2	2	1	2	1	4	1	2	2	1	5	5	2	4	2
1	3	2	1	1	3	2	4	2	3	4	4								1	2	2	1	2	2	2	2	2	1	2	2	3	3	2	2	3	2	2	4	2	3	3	3	2	3	3	4	3	4	1
1	3	2	1	1	1	1	5	1	5	3	3								1	1	1	1	1	1	1	1	1	1	1	1	2	1	1	1	2	1	1	2	2	3	3	3	3	2	3	4	3	3	2
1	3	2	1	1	1	1	1	1	1	3	2								1	1	1	1	1	1	1	1	1	1	2	1	1	3	1	1	2	1	1	3	1	3	3	1	3	2	2	1	2	3	2
1	3	2	1	1	2	1	3	3	5	5	5								1	2	1	1	3	3	3	1	3	3	2	3	1	5	3	1	3	3	1	1	2	3	1	3	3	2	3	1	2	4	3
1	3	2	1	1	1	2	1	1	5	5	3								2	1	2	1	2	2	2	2	2	2	1	1	2	4	2	1	4	2	1	4	1	5	1	1	3	1	4	4	4	4	1
1	3	2	1	1	1	1	2	1	2	1	3								1	1	1	1	2	2	1	2	2	1	1	1	1	2	3	1	2	3	1	2	2	3	1	2	3	2	4	2	2	2	2
1	3	2	1	4	3	1	1	2	2	5	2								1	2	2	2	1	1	2	2	3	1	2	1	2	2	2	1	3	2	2	2	1	4	1	2	3	1	4	4	3	5	1
1	3	2	2	2	2	2	2	2	4	4	4								2	2	2	3	2	2	3	4	4	2	2	2	2	4	2	2	1	2	2	1	4	1	4	5	5	5	1	1	1	5	5
1	3	2	2	2	2	2	4	1	4	5	5								2	2	2	2	2	2	2	1	1	2	1	2	3	2	4	2	4	3	2	4	2	3	1	2	2	2	3	2	1	3	3
1	3	1	2	1	2	1	2	2	1	4	3								5	5	5	4	4	4	4	4	5	4	3	4	4	2	3	3	4	3	3	3	2	3	3	3	3	2	3	2	2	3	1
1	3	1	2	1	1	2	4	1	3	4	3								2	3	3	3	2	3	2	3	3	3	3	2	3	3	3	2	4	3	3	4	2	4	3	3	3	3	2	4	2	2	2
1	3	1	1	1	2	4	3	2	4	3	4								2	4	2	1	1	4	1	3	3	2	2	2	4	2	2	2	2	2	3	2	2	4	2	2	3	2	4	3	2	2	2
1	3	1	1	1	2	2	3	3	4	3	3								2	4	3	2	4	5	5	3	4	2	2	1	4	1	2	2	4	2	2	4	1	3	1	1	2	1	3	2	2	3	2
1	3	1	3	2	4	3	4	3	3	3	2								2	3	4	2	4	3	3	3	4	2	2	3	3	1	3	3	4	3	3	2	2	1	3	4	3	2	2	3	2	1	3
1	3	1	2	2	1	3	2	1	1	3	2								2	4	4	3	3	4	4	4	3	2	4	4	4	4	4	4	4	4	4	4	3	1	1	3	2	3	3	3	1	1	3
1	3	1	2	3	3	2	2	2	2	4	3								2	4	4	2	2	4	3	4	3	2	3	3	4	2	3	4	3	3	4	3	3	3	3	3	3	3	2	3	2	2	3
1	3	1	2	2	2	2	4	2	3	4	4								2	4	4	3	3	4	4	4	4	3	2	2	3	2	3	2	2	4	2	2	2	2	3	3	4	3	3	3	1	1	2
1	3	1	2	2	3	2	4	2	2	4	4								2	4	2	2	2	3	2	3	4	2	3	2	3	2	3	3	2	4	2	2	3	2	4	4	4	4	2	4	2	2	3
1	3	1	2	2	3	2	3	3	2	4	2								2	3	3	2	3	3	3	3	3	2	2	2	3	2	2	3	2	2	3	2	3	3	3	4	3	3	2	3	2	3	3
1	3	1	1	1	1	1	1	1	5	5	5								1	3	3	2	2	3	2	2	3	3	2	1	2	2	3	2	2	3	2	2	1	3	3	1	3	1	3	1	1	3	2
1	3	1	2	2	2	1	3	1	3	3	3								3	5	4	3	3	3	3	3	3	3	3	3	3	1	3	3	2	3	3	1	3	3	3	3	3	3	3	1	1	3	3
1	3	1	2	1	3	3	3	2	1	3	4								2	2	1	3	3	2	4	1	2	4	4	3	3	1	4	3	1	4	4	1	3	1	4	5	1	5	1	4	1	1	5
1	3	1	1	1	1	1	3	1	5	4	2								1	2	2	2	1	2	2	1	2	1	2	1	2	2	1	2	2	1	2	3	1	5	1	1	2	1	4	5	2	3	1
1	3	1	2	1	2	1	3	1	3	4	4								2	3	2	2	2	3	3	3	4	3	3	2	3	1	4	3	3	4	3	2	3	2	3	4	3	3	2	3	2	4	2
1	3	1	1	1	1	1	3	1	3	4	2								1	3	3	2	1	2	1	3	2	1	2	2	1	3	2	1	4	2	2	4	1	4	1	1	4	1	4	2	3	3	2
1	3	1	1	1	3	2	4	1	4	4	3								2	2	2	2	2	3	2	1	3	3	2	2	3	2	3	2	2	2	2	2	3	3	2	2	3	3	3	4	2	3	2
1	3	1	1	1	1	3	1	2	5	5	4								2	2	2	2	2	2	4	3	3	2	2	2	2	3	2	2	2	3	2	2	4	4	2	2	4	2	2	2	2	2	3
1	3	1	1	1	2	2	1	1	5	4	3								2	2	2	2	1	3	3	3	2	2	2	1	2	4	3	2	3	3	2	4	1	4	1	2	2	1	4	5	2	3	2
1	3	1	1	1	1	2	4	2	3	3	2								2	3	2	1	2	3	3	2	2	2	2	2	2	1	2	3	2	2	2	1	2	1	3	5	5	5	3	1	1	1	3
1	3	1	1	1	1	1	2	1	5	5	4								1	2	2	2	2	2	3	2	3	2	2	1	2	2	2	2	4	2	1	3	2	4	1	2	3	1	5	2	4	5	2
1	3	1	1	1	1	1	5	1	5	5	4								1	4	2	2	3	3	2	3	3	3	2	2	3	2	3	2	2	3	3	2	2	3	3	3	2	3	2	3	2	2	3
1	3	1	1	1	2	2	2	3	4	4	2								2	4	2	2	3	2	3	3	3	2	2	2	2	1	3	2	4	3	2	2	3	1	4	5	2	5	1	4	1	2	3
1	3	1	4	4	3	4	4	4	1	3	5								5	5	5	5	5	5	5	5	5	5	5	4	5	2	1	5	5	1	5	4	5	1	3	5	5	5	1	1	1	1	5
1	3	1	1	1	2	2	2	2	5	4	3								1	4	2	3	2	2	3	2	3	2	3	1	3	2	4	2	4	3	3	3	1	4	2	2	3	2	5	4	3	3	2
1	3	1	1	1	2	3	4	3	5	5	5								1	3	2	2	3	3	3	2	4	3	1	1	1	2	2	1	2	2	2	2	2	3	2	2	2	2	4	4	3	2	2
1	3	1	2	2	3	2	3	3	3	3	2								3	4	3	3	3	4	3	3	3	3	4	3	3	3	3	3	2	2	2	2	2	4	3	3	3	3	3	4	4	2	3
1	3	1	1	1	1	1	2	1	2	3	4								2	3	3	2	2	2	3	2	2	2	2	1	2	2	3	2	2	2	2	2	2	3	2	2	2	2	4	3	2	3	2
1	3	1	1	1	1	1	3	1	3	3	2								1	3	1	1	2	2	3	4	3	1	1	1	2	1	2	2	1	4	2	1	2	3	3	4	2	4	2	4	1	1	2
1	3	1	3	3	3	3	3	3	2	2	2								3	5	4	3	3	3	4	4	4	3	4	3	5	3	3	4	2	3	4	2	3	2	3	3	3	3	3	3	2	3	2
1	3	1	2	2	2	2	2	2	3	5	3								2	3	3	2	3	3	2	3	3	2	2	2	2	2	3	3	4	3	3	4	5	1	5	5	5	3	1	2	1	1	5
1	3	1	1	1	2	4	5	4	5	5	5								1	2	1	1	3	3	3	1	3	3	2	2	1	2	3	1	4	2	1	4	1	5	1	2	3	2	4	4	3	4	3
1	3	1	2	2	3	2	3	2	3	3	2								2	3	2	2	3	3	3	2	3	2	3	2	3	3	3	2	2	3	2	3	2	3	2	3	3	2	3	2	4	3	2
1	3	1	2	1	1	1	3	2	3	2	1								2	4	3	1	2	2	2	1	3	2	3	2	4	2	2	3	2	2	2	2	1	4	4	4	2	3	2	3	1	3	3
1	3	1	1	1	3	2	3	2	3	3	2								2	2	2	2	2	3	3	2	3	2	2	2	2	2	2	2	3	2	2	2	2	2	3	3	4	3	2	3	1	2	2
1	3	1	2	2	3	2	3	3	2	3	5								3	4	3	3	3	3	3	3	3	3	4	4	5	4	4	4	4	4	4	4	3	2	3	3	3	3	3	3	1	1	3
1	3	1	2	2	2	3	3	2	2	5	3								1	2	2	2	2	3	2	2	2	2	3	2	3	3	3	2	2	2	2	2	2	3	3	3	3	3	3	3	2	2	2
1	3	1	1	1	2	3	2	1	3	5	4								1	2	2	2	3	3	3	2	3	2	2	1	3	2	2	2	2	2	2	3	2	4	2	3	2	2	3	3	3	4	2
1	3	1	3	3	3	3	3	3	1	3	3								3	4	4	3	2	2	4	4	3	3	4	3	4	2	3	4	3	3	4	3	3	2	3	4	3	4	2	2	2	2	3
1	3	1	1	1	1	1	1	1	3	3	1								1	1	1	1	1	1	1	1	1	1	2	1	2	2	3	1	4	3	1	4	2	3	2	3	2	4	5	4	5	3	2
1	4	2	1	1	1	1	3	1	5	5	5								1	1	1	1	1	4	1	1	2	1	1	1	1	1	2	1	1	2	1	1	1	5	1	1	3	2	5	5	5	5	1
1	4	2	2	2	5	4	2	2	2	4	4								2	2	1	1	2	2	4	2	5	1	2	2	4	1	2	4	1	4	4	1	2	1	4	4	3	4	1	1	1	1	4
1	4	2	2	2	2	2	2	2	2	2	2								2	4	3	2	4	2	4	3	3	2	2	2	2	2	2	2	2	3	2	2	3	2	3	3	3	3	3	3	2	3	4
1	4	2	1	1	1	1	1	1	5	5	5								1	1	1	1	1	1	1	2	1	1	1	1	1	1	3	1	1	3	1	1	1	5	1	1	2	1	5	5	5	5	1
1	4	2	1	1	1	1	1	1	5	5	3								1	1	1	1	1	2	3	1	4	2	1	1	1	3	3	1	1	1	1	1	1	3	3	3	3	1	4	4	4	4	1
1	4	2	2	2	2	2	2	2	2	2	2								2	4	2	2	4	2	2	2	2	2	2	2	2	2	2	2	2	2	2	2	2	2	2	4	2	2	2	3	2	2	2
1	4	2	2	2	2	2	2	2	2	3	2								2	2	2	2	2	4	4	4	4	2	4	2	4	1	4	4	1	3	4	1	2	3	2	5	2	4	4	1	2	2	2
1	4	2	1	1	1	1	1	1	5	5	3								1	1	1	1	1	2	4	1	1	2	1	1	1	2	1	1	5	2	1	5	1	5	1	1	3	1	5	5	5	5	1
1	4	2	2	2	1	2	4	2	5	5	4								2	2	2	2	2	2	2	2	2	2	2	3	3	3	3	2	2	3	3	2	2	3	4	4	3	4	2	3	2	4	3
1	4	2	1	1	3	1	3	1	5	3	5								1	3	3	1	2	2	1	3	2	2	1	1	3	1	3	1	1	3	3	1	2	4	2	3	3	3	3	3	2	3	2
1	4	2	1	1	1	5	5	4	3	5	5								1	1	1	1	2	3	3	1	3	2	1	1	1	1	2	1	1	1	1	1	1	4	1	3	3	1	4	5	4	4	3
1	4	2	1	1	3	1	1	1	3	2	5								2	5	5	2	4	3	4	3	3	3	5	2	5	2	4	3	2	4	3	1	2	1	3	3	3	4	3	5	1	1	2
1	4	2	1	1	1	1	2	1	3	1	4								1	2	2	1	2	2	4	2	2	2	2	1	2	2	2	2	1	2	2	1	2	3	2	2	3	3	3	4	1	3	2
1	4	2	2	1	1	2	5	2	1	5	5								1	1	1	1	1	1	2	1	3	2	1	1	1	5	2	1	5	1	1	5	1	5	1	1	1	1	5	5	3	5	5
1	4	2	2	2	2	2	2	2	2	2	2								2	4	4	2	2	4	2	4	2	2	4	2	4	2	4	4	2	4	4	2	2	2	2	2	3	2	2	2	2	2	2
1	4	2	1	1	1	1	5	3	4	5	5								1	2	1	1	2	3	3	2	3	2	2	1	2	3	2	1	2	2	2	2	1	4	1	1	2	2	5	4	2	2	1
1	4	2	1	1	1	1	5	1	5	5	5								1	1	1	1	2	4	4	1	4	2	1	2	1	3	3	1	1	3	1	2	2	5	3	2	2	2	2	5	1	2	1
1	4	2	2	2	2	2	2	2	2	2	2								2	2	2	2	2	2	2	2	2	2	2	2	2	2	2	2	2	2	2	2	2	2	3	2	2	3	2	2	4	2	2
1	4	2	1	1	1	1	1	1	1	1	1								2	3	2	1	4	2	2	2	2	2	2	2	2	2	2	2	2	2	2	2	2	2	2	4	2	4	2	4	2	2	2
1	4	2	1	1	1	1	2	1	5	5	3								1	2	2	2	1	3	3	1	2	1	2	1	2	1	2	1	2	1	1	2	1	4	3	3	1	3	3	3	1	3	4
1	4	2	1	1	1	2	4	1	1	5	5								1	1	1	1	1	2	2	1	1	1	1	1	1	3	2	1	4	2	1	4	1	4	1	1	2	1	5	5	1	5	3
1	4	2	2	2	2	2	2	2	2	2	2								2	2	2	2	2	2	2	2	2	2	2	2	2	2	2	2	2	2	2	2	2	3	2	2	2	2	2	2	2	2	2
1	4	2	2	2	2	2	2	2	2	2	2								2	2	2	2	2	2	2	2	2	2	2	2	2	2	2	2	2	2	2	2	2	4	2	2	2	2	2	2	2	2	2
1	4	2	1	1	1	1	1	1	1	1	1								2	2	2	2	2	2	2	2	2	2	2	2	2	2	2	2	2	2	2	2	2	4	2	2	2	2	2	2	2	2	2
1	4	2	1	4	5	2	5	3	1	2	2								4	5	5	5	5	5	5	5	5	5	5	4	5	1	1	5	2	1	5	1	1	1	1	3	3	5	1	1	5	3	3
1	4	2	1	1	1	1	1	1	5	5	5								1	1	1	1	1	1	1	1	1	1	1	1	1	1	1	1	5	3	1	5	1	4	1	1	1	1	5	1	4	4	1
1	4	2	2	2	2	2	2	2	2	2	2								2	2	2	2	2	2	2	2	2	2	2	2	2	2	2	2	2	2	2	2	2	2	2	2	4	2	2	2	2	2	2
1	4	2	2	2	2	2	2	2	2	2	2								2	2	2	2	2	2	2	2	2	2	2	2	2	2	2	2	2	2	2	2	2	4	3	4	2	3	2	3	2	4	2
1	4	2	2	2	2	2	2	2	2	2	2								2	2	2	2	2	2	2	2	2	2	2	2	2	2	2	2	2	2	2	2	2	4	2	4	4	2	2	2	2	2	2
1	4	2	2	2	2	2	2	2	2	2	2								2	2	2	2	2	2	2	2	2	2	2	2	2	2	2	2	2	2	2	2	2	2	2	2	2	2	2	2	2	2	2
1	4	2	2	2	2	2	2	2	2	2	2								2	2	2	2	2	2	2	2	2	2	2	2	2	2	2	2	2	2	2	2	3	3	3	3	3	3	3	3	3	3	3
1	4	2	2	2	2	2	2	2	2	2	2								2	2	2	2	2	2	2	2	2	2	2	2	2	2	2	2	2	2	2	2	2	2	2	2	2	2	2	2	2	2	2
1	4	2	2	2	2	2	2	2	2	2	2								2	2	2	2	2	2	2	2	2	2	2	2	2	2	2	2	2	2	2	2	2	3	3	4	4	4	2	4	2	2	2
1	4	2	1	1	1	1	2	1	4	1	2								1	1	1	1	3	3	3	1	1	3	1	1	2	2	1	1	4	3	2	4	1	4	1	1	1	1	5	1	5	5	1
1	4	2	1	1	1	2	3	2	4	5	5								1	1	1	1	1	1	2	1	2	2	2	1	2	1	2	1	2	2	2	2	2	4	1	1	1	1	5	5	3	5	2
1	4	2	2	2	2	4	4	4	2	5	5								1	1	1	1	1	2	3	1	4	2	2	1	1	3	2	1	4	3	1	4	1	3	2	2	3	2	4	4	2	4	2
1	4	2	2	1	1	2	3	3	2	4	2								1	3	3	2	3	4	2	4	3	3	4	2	4	1	5	3	1	5	2	1	1	3	3	4	5	3	3	3	1	1	1
1	4	1	2	1	2	2	2	1	3	4	3								1	2	2	2	2	1	1	2	2	1	1	2	2	2	2	1	2	2	2	1	2	1	2	2	2	1	2	2	1	2	1
1	4	1	1	1	2	3	4	2	3	4	5								2	5	4	2	2	5	4	5	5	4	4	2	4	1	2	5	1	1	3	1	2	4	5	3	3	4	3	5	2	2	3
1	4	1	4	2	2	2	4	2	3	3	3								3	2	3	2	4	3	4	3	3	5	3	3	3	2	3	3	2	3	3	2	2	3	3	3	3	3	4	3	1	3	2
1	4	1	2	2	3	2	4	2	3	4	4								3	3	3	3	3	3	3	3	3	3	3	3	3	3	3	3	3	4	3	3	1	1	1	1	1	4	1	1	5	1	1
1	4	1	3	3	3	5	5	5	1	3	4								4	5	5	4	3	3	2	5	3	3	4	3	5	1	2	5	3	1	5	3	3	3	3	3	3	3	3	4	3	3	3
1	4	1	1	1	1	1	3	1	4	5	3								2	5	3	2	2	3	2	3	3	2	2	1	3	3	2	3	2	3	2	2	1	4	1	3	2	1	4	4	2	3	2
1	4	1	2	2	2	2	2	2	4	3	2								2	4	4	2	4	4	4	4	4	3	3	3	4	3	4	4	2	4	4	2	2	4	3	2	2	2	3	4	3	4	2
1	4	1	1	1	3	1	2	1	2	2	4								1	2	3	2	3	2	4	3	3	2	1	1	3	1	3	3	2	2	2	2	3	3	3	3	3	3	2	2	2	4	2
1	4	1	1	1	1	1	2	3	3	3	2								2	2	2	2	3	2	2	2	2	2	2	2	2	2	3	2	1	3	2	1	2	2	3	3	2	3	2	2	2	2	2
1	4	1	1	1	1	1	1	1	5	5	5								1	1	1	1	1	3	3	1	3	4	1	1	1	1	1	1	5	1	1	5	1	5	1	3	1	1	5	1	1	1	1
1	4	1	1	2	1	1	2	2	4	4	3								3	4	3	2	3	3	3	2	3	2	3	3	3	1	1	2	2	2	2	2	2	1	3	4	3	3	1	3	1	1	4
1	4	1	2	2	2	2	2	2	2	2	2								2	3	4	2	3	2	2	2	4	4	3	3	3	3	3	2	3	4	4	3	3	3	3	3	3	3	3	3	3	3	3
1	4	1	3	3	3	4	2	3	3	3	3								3	3	3	3	3	3	3	3	3	3	4	3	3	2	4	2	3	4	4	5	3	2	2	3	3	3	2	4	2	2	3
1	4	1	2	1	4	3	3	3	1	2	3								2	3	2	3	2	3	3	2	2	1	4	3	4	4	4	3	2	3	3	3	2	3	3	1	1	3	3	2	2	3	1
1	4	1	3	4	5	3	5	4	1	2	5								5	5	5	3	5	5	5	5	5	5	5	4	5	1	2	5	3	2	5	3	5	1	4	5	5	5	1	1	1	1	5
1	4	1	1	2	1	2	1	2	2	2	5								2	4	4	2	2	4	3	1	2	2	4	2	4	2	4	3	2	4	3	2	2	4	2	2	3	2	3	5	3	1	1
1	4	1	2	2	3	2	3	2	4	3	2								2	4	4	2	3	3	4	3	3	3	4	2	5	2	3	4	3	4	3	2	3	3	3	3	3	3	3	3	3	3	3
1	4	1	1	1	1	1	1	1	5	5	4								1	1	1	1	2	3	1	1	3	1	2	1	1	2	1	1	3	2	1	2	2	3	5	4	4	3	1	3	3	1	4
1	4	1	1	1	1	1	1	1	4	4	4								1	3	1	2	2	4	3	1	1	1	2	3	3	1	3	2	3	4	2	2	2	4	2	2	3	1	3	1	2	3	3
1	4	1	1	1	1	1	1	1	5	3	3								1	2	2	2	2	3	2	2	3	2	2	1	1	3	2	1	3	2	1	3	2	5	2	3	3	2	3	4	4	3	2
1	4	1	1	1	1	1	5	1	5	5	5								1	4	4	1	2	4	4	3	3	1	2	1	1	2	1	1	1	1	1	2	1	2	1	4	3	1	5	5	4	4	1
1	4	1	3	3	3	3	3	3	1	3	3								3	4	4	3	4	3	3	4	3	3	4	3	4	1	2	3	1	2	3	1	2	2	3	3	3	3	3	3	2	3	3
1	4	1	1	1	1	2	4	2	3	4	4								1	2	2	1	2	2	3	2	3	2	2	1	3	2	2	1	2	2	2	3	1	2	1	2	2	1	5	4	2	3	2
1	4	1	1	1	2	1	3	2	4	2	2								1	3	2	1	2	3	3	3	3	3	3	2	2	2	3	2	3	3	2	3	2	3	3	2	3	2	3	3	2	3	2
1	4	1	1	1	1	1	1	1	5	1	5								1	1	1	1	3	3	3	1	3	3	1	1	3	3	3	1	3	3	2	1	3	1	3	3	1	3	1	3	1	1	3
1	4	1	3	3	3	3	3	3	3	3	3								3	3	3	3	3	3	3	3	3	3	3	3	3	3	3	3	3	3	3	3	3	3	3	3	3	3	3	3	3	3	3
1	4	1	2	3	3	2	3	3	2	3	2								3	5	5	3	5	4	5	4	4	4	4	3	5	3	5	4	1	3	3	1	3	2	3	3	3	3	3	2	1	3	2
1	4	1	2	2	3	2	4	3	1	3	4								3	3	2	3	3	5	4	2	4	4	3	3	3	3	3	3	3	3	3	3	3	1	5	3	3	3	2	3	2	2	3
1	4	1	2	2	3	2	3	2	2	3	4								2	3	4	3	2	4	4	4	3	3	4	3	4	2	4	3	3	4	4	3	3	3	3	3	3	3	3	3	2	3	3
1	4	1	1	1	1	3	3	1	5	5	5								1	3	2	1	1	1	2	1	2	1	1	1	1	3	2	1	3	1	1	3	1	5	1	1	1	1	5	5	3	5	1
1	4	1	2	2	2	2	5	4	3	4	4								2	4	5	4	3	2	4	4	3	3	3	4	5	1	3	4	4	2	4	1	2	1	5	4	2	4	1	1	1	4	4
1	4	1	2	2	3	5	5	5	2	5	5								4	5	5	3	4	5	4	5	5	4	5	3	4	1	2	5	1	3	4	1	4	2	2	3	3	3	3	3	3	3	3
1	4	1	1	1	1	2	2	1	2	1	4								2	2	3	2	3	3	3	2	3	3	3	2	3	3	3	3	3	3	3	2	3	1	3	3	3	5	2	1	1	1	1
1	4	1	4	2	2	2	3	2	4	4	3								2	2	2	2	2	2	2	3	3	2	1	1	3	4	3	3	2	3	2	4	2	3	2	2	3	2	4	3	3	4	2
1	4	1	1	5	1	1	1	1	5	5	5								1	1	1	1	1	1	1	1	1	1	1	1	2	2	1	1	1	1	2	5	2	3	3	3	3	5	1	5	1	1	1
1	4	1	1	1	1	1	1	1	5	5	5								1	3	1	1	2	1	3	3	3	1	2	2	2	2	3	2	2	3	2	3	3	3	3	3	3	3	3	3	3	3	2
1	4	1	1	1	2	3	4	3	3	5	5								1	3	2	1	2	4	3	2	4	4	2	2	3	2	2	3	2	2	3	2	1	3	1	3	3	1	5	4	2	3	3
1	4	1	2	2	3	4	3	4	2	3	5								2	4	4	2	3	4	3	3	3	3	5	3	4	3	4	4	2	4	4	2	2	1	4	4	3	3	2	2	1	2	3
1	4	1	1	1	2	1	1	1	2	3	3								2	5	5	2	3	4	3	3	3	3	2	1	3	2	3	2	3	3	2	2	2	2	3	3	3	3	3	3	2	3	2
1	4	1	1	1	1	1	1	1	5	5	1								1	1	1	1	1	1	1	1	1	1	2	1	1	2	1	1	1	1	1	2	1	1	1	5	1	3	5	1	1	1	2
1	6	2	2	3	4	4	5	3	5	4	4								2	2	2	2	2	1	1	2	4	2	2	3	2	1	4	1	4	3	2	4	2	2	3	2	2	3	3	3	2	2	1
1	6	2	1	1	5	1	5	5	5	1	5								1	5	1	1	1	1	1	1	1	1	2	1	4	1	3	1	4	3	2	5	1	5	3	4	5	2	1	4	2	2	2
1	6	2	1	1	1	3	1	4	4	2	3								1	1	1	1	1	1	1	1	1	1	1	1	3	1	1	1	2	3	1	1	3	5	2	2	2	2	3	3	3	3	2
1	6	2	3	1	1	1	1	1	1	2	3								1	2	2	1	3	3	3	1	3	2	5	2	4	1	1	1	5	1	4	5	4	1	3	5	1	5	3	1	1	1	3
1	6	2	1	1	1	2	1	2	5	5	3								1	2	2	1	1	2	1	2	1	1	1	1	1	3	3	1	2	3	1	3	1	2	1	1	2	2	4	4	2	4	2
1	6	2	1	1	4	4	4	4	4	5	4								1	1	1	1	2	3	3	1	1	1	1	1	4	3	2	2	3	1	3	3	1	3	1	3	4	3	3	3	1	2	3
1	6	2	5	3	5	5	5	4	5	5	3								3	1	1	3	3	3	3	2	2	3	3	4	3	3	1	3	5	1	3	5	2	1	5	5	4	5	1	3	1	1	2
1	6	1	1	2	2	3	3	1	4	3	5								2	4	3	2	4	4	4	3	4	2	4	2	4	2	4	2	2	4	2	2	3	3	3	3	3	4	3	4	2	3	3
1	6	1	4	4	4	4	4	4	1	3	3								4	4	4	4	4	4	4	4	4	4	4	4	4	2	4	4	3	4	4	3	3	3	3	3	3	3	3	3	3	3	3
1	6	1	1	1	1	2	2	1	5	5	5								1	2	2	1	1	1	1	2	1	1	1	1	1	2	1	1	2	2	1	2	1	5	2	1	2	1	5	5	4	4	1
1	6	1	1	1	3	3	5	4	5	3	5								1	3	2	1	1	3	1	2	3	3	1	1	2	3	1	1	3	2	1	3	1	5	1	3	1	1	5	1	4	3	1
1	6	1	1	2	2	2	3	1	5	4	4								1	2	3	2	2	3	3	3	3	4	2	2	2	2	2	2	2	3	2	2	2	4	2	2	2	2	3	3	2	3	2
1	6	1	1	1	1	2	4	3	3	4	3								2	2	3	2	2	3	2	3	2	2	3	2	4	3	2	3	3	2	4	3	2	3	2	2	3	3	4	4	2	4	2
1	6	1	2	1	2	1	4	4	5	4	4								1	3	2	2	2	3	2	3	3	2	3	2	3	3	3	3	2	2	2	2	2	3	2	3	4	4	2	2	2	3	2
1	6	1	1	2	3	3	3	4	2	3	3								3	5	5	3	2	4	3	5	4	3	3	2	4	1	4	3	4	4	3	2	2	1	3	4	3	3	2	3	1	2	2
1	6	1	1	1	1	3	5	3	3	5	5								1	3	1	2	2	2	2	2	2	2	3	1	1	2	2	1	1	2	1	1	1	3	1	1	1	1	5	2	3	4	1
1	6	1	1	1	2	2	2	2	3	4	4								1	3	1	2	2	4	3	1	4	2	2	2	3	2	2	1	4	2	2	4	1	3	4	5	2	4	2	4	1	3	2
1	6	1	1	1	1	1	3	1	4	4	5								1	2	2	1	3	3	3	2	3	3	2	2	2	3	2	1	1	1	2	1	1	5	1	1	3	1	5	5	4	2	1
1	6	1	1	1	1	2	4	2	4	5	4								1	4	1	2	2	3	4	4	3	2	2	1	2	4	1	1	2	1	1	1	1	5	1	1	2	1	5	5	2	5	1
1	6	1	1	1	1	1	1	1	5	5	5								1	2	1	1	3	3	3	2	3	3	1	1	2	3	3	2	1	3	2	1	1	3	3	3	3	1	3	5	3	3	3
1	6	1	3	3	4	1	1	5	3	4	3								5	2	3	4	1	5	2	5	3	4	1	4	4	3	5	3	5	4	2	2	2	5	1	3	2	2	1	3	4	5	4
1	6	1	1	1	1	1	1	5	5	5	5								1	2	1	1	1	2	1	1	3	1	2	1	2	2	2	2	1	2	1	2	2	2	3	3	3	3	3	4	2	3	3
1	6	1	1	1	1	1	3	2	3	3	3								2	3	3	2	2	3	3	3	3	2	3	2	2	2	3	2	3	2	2	2	2	3	3	3	3	3	3	2	3	3	3
1	6	1	2	2	2	2	2	2	3	4	3								3	3	3	3	3	3	3	4	3	3	3	2	3	2	3	3	3	3	3	2	2	2	2	3	3	2	2	3	2	3	3
1	6	1	4	5	4	5	5	5	1	1	5								5	5	5	5	5	5	5	5	5	5	5	5	5	1	1	5	1	1	5	1	5	1	5	5	5	5	1	1	1	1	5
1	6	1	2	2	3	3	4	3	1	3	5								3	5	4	3	4	5	4	4	5	3	5	4	5	2	2	5	2	1	5	2	3	1	3	4	5	4	3	1	2	2	3
1	5	2	1	5	1	5	5	3	3	5	5								3	1	3	3	3	2	3	3	2	2	5	3	5	5	5	5	3	5	2	3	1	5	4	5	3	5	1	3	1	5	2
1	5	2	1	1	3	1	3	3	5	5	5								1	2	1	2	1	2	2	2	3	2	2	2	2	2	2	2	2	2	3	2	1	2	5	5	2	4	1	2	4	3	2
1	5	2	1	1	1	1	2	1	5	5	5								1	1	1	1	1	2	2	1	2	1	1	1	1	3	3	1	2	3	1	2	1	5	1	1	1	1	5	5	2	5	1
1	5	2	1	1	1	1	1	1	5	5	5								1	5	1	1	1	5	1	1	1	1	1	1	1	1	1	1	5	2	1	2	1	5	1	1	2	1	4	5	3	4	1
1	5	2	5	1	1	1	5	1	5	5	4								1	3	3	1	1	1	1	3	1	1	3	3	3	1	3	2	3	3	1	4	3	1	5	5	5	5	1	1	1	1	3
1	5	2	2	2	2	2	2	2	2	2	2								2	2	2	2	2	2	2	2	2	2	2	2	2	2	2	2	2	2	2	2	2	4	2	2	2	2	2	2	2	2	2
1	5	2	4	4	4	4	4	4	4	4	4								4	4	4	4	4	4	4	4	4	4	4	4	4	1	4	4	1	4	4	4	4	1	4	4	4	4	1	5	1	1	4
1	5	2	2	2	2	2	2	2	2	2	2								2	2	2	2	2	2	2	2	2	2	2	2	2	2	2	2	2	2	2	2	2	4	2	2	2	2	2	4	2	2	2
1	5	2	4	1	4	5	5	4	3	5	2								2	1	2	1	1	2	2	2	4	2	2	3	5	1	5	2	1	5	4	1	1	1	2	4	2	4	3	4	1	1	2
1	5	2	2	2	2	2	2	2	2	2	2								2	2	2	2	2	2	2	2	2	2	2	2	2	2	2	2	2	2	2	2	1	4	1	1	1	1	4	1	3	4	1
1	5	2	3	1	2	5	5	1	1	5	1								1	2	1	2	1	5	5	1	2	3	1	3	3	1	3	2	2	5	2	3	3	1	4	5	3	3	3	2	1	1	3
1	5	2	1	2	2	2	4	1	2	1	3								1	1	1	1	1	2	1	2	2	1	3	4	4	1	1	2	4	1	2	4	4	1	5	5	5	5	1	4	1	1	1
1	5	2	1	1	1	3	4	3	4	5	4								1	2	2	1	2	3	3	3	3	3	2	1	3	3	2	1	2	2	2	2	1	3	1	2	1	1	5	4	2	4	1
1	5	2	3	4	5	5	4	5	1	5	1								3	5	5	5	2	2	2	5	2	5	3	4	4	4	4	5	5	3	3	4	1	1	5	5	1	5	1	1	1	1	1
1	5	2	1	1	1	1	5	3	3	5	5								1	1	1	1	1	2	4	2	3	2	1	1	2	2	1	1	2	2	1	2	1	4	1	1	1	1	5	5	1	4	1
1	5	2	2	2	2	2	2	2	2	2	2								2	2	2	2	2	2	2	2	2	2	2	2	2	2	2	2	2	2	2	2	2	2	2	2	2	2	3	2	2	2	2
1	5	2	1	1	1	3	5	1	2	5	3								1	1	1	1	1	1	1	1	1	1	2	1	2	2	2	1	1	1	1	1	1	1	2	3	2	3	4	2	1	1	1
1	5	2	1	1	1	1	4	1	5	5	3								1	2	1	1	3	3	3	2	3	2	1	1	1	2	1	1	1	2	1	2	1	4	1	1	1	1	5	4	1	4	1
1	5	2	4	3	4	4	4	4	2	5	2								4	2	2	3	2	2	2	2	2	3	3	3	3	2	2	3	3	4	3	5	4	1	5	5	5	2	1	1	1	1	3
1	5	2	1	1	2	1	3	3	4	5	5								1	3	2	2	2	2	2	2	1	2	3	1	2	3	5	1	1	5	3	1	1	5	1	3	1	2	5	2	2	2	1
1	5	2	2	2	2	2	2	2	2	2	2								2	4	2	2	2	2	2	2	2	2	2	2	2	2	2	2	2	2	2	2	2	2	2	2	2	2	2	2	2	2	2
1	5	2	4	5	5	4	5	5	1	3	1								3	5	5	5	5	5	5	5	5	5	5	5	5	1	4	2	2	3	5	4	1	1	3	2	2	5	1	1	1	1	5
1	5	2	4	3	2	4	4	4	2	5	4								3	4	3	2	4	4	4	4	4	4	4	3	3	2	4	3	2	4	2	3	2	2	4	3	5	2	3	2	1	2	5
1	5	2	1	1	1	5	5	3	1	1	1								1	1	1	2	2	1	1	2	1	1	1	1	1	1	1	1	1	1	2	2	3	1	5	5	4	5	5	5	4	5	3
1	5	2	1	1	1	3	3	3	3	5	5								1	2	1	1	4	2	4	2	4	4	3	2	2	1	1	1	2	2	2	1	3	3	2	2	2	2	4	4	1	3	4
1	5	2	3	1	5	3	5	5	3	3	3								2	1	1	1	3	1	1	5	3	1	1	3	2	3	3	1	3	3	2	3	3	1	5	5	5	5	1	3	1	1	3
1	5	2	1	1	2	4	4	2	2	4	5								2	4	3	3	2	4	4	3	3	3	3	2	5	1	2	4	1	2	4	2	3	1	3	4	3	4	3	3	1	2	3
1	5	2	2	2	2	2	2	2	2	2	2								2	2	2	2	2	2	2	2	2	2	2	2	2	2	2	2	2	2	2	2	2	3	2	4	2	2	3	2	2	2	2
1	5	2	1	1	1	1	1	1	1	1	1								2	2	2	2	2	2	2	2	2	2	2	2	2	2	2	2	2	2	2	2	2	4	2	2	2	3	4	2	4	3	2
1	5	2	2	2	2	2	2	2	2	2	2								2	2	2	2	2	2	2	2	2	2	2	2	2	2	2	2	2	2	2	2	2	2	2	2	2	2	2	2	2	2	2
1	5	2	2	2	2	2	2	2	2	2	2								2	2	2	2	2	2	2	2	2	2	2	2	2	2	2	2	2	2	2	2	2	4	2	2	2	2	2	2	2	2	2
1	5	2	4	4	4	4	4	4	1	4	2								4	4	4	4	4	4	4	4	4	4	4	4	4	2	2	4	2	2	4	2	4	1	4	4	4	4	1	4	1	1	4
1	5	2	4	4	5	5	5	5	1	5	4								4	4	4	4	4	4	3	3	3	4	4	5	1	2	2	3	4	4	2	4	2	5	5	5	5	5	1	5	1	1	2
1	5	2	2	2	2	2	2	2	2	2	2								2	2	2	2	2	2	2	2	2	2	2	2	2	2	2	2	2	2	2	2	2	3	2	2	2	2	2	2	2	2	2
1	5	2	2	2	2	2	2	2	2	2	2								2	2	2	2	2	2	2	2	2	2	2	2	2	2	2	2	2	2	2	2	2	3	2	2	2	2	2	2	2	2	2
1	5	2	2	2	2	2	2	2	2	2	2								2	2	2	2	2	2	2	2	2	2	2	2	2	2	2	2	2	2	2	2	2	2	2	2	2	2	2	2	2	2	2
1	5	2	2	2	2	2	2	2	1	2	2								2	2	2	2	2	2	2	2	2	2	2	2	2	2	2	2	2	2	2	2	2	2	2	3	2	2	2	3	2	2	2
1	5	2	2	2	2	2	2	2	2	2	2								2	2	2	2	2	2	2	2	2	2	2	2	2	2	2	2	2	2	2	2	2	3	2	2	3	2	2	3	2	2	2
1	5	2	2	2	2	2	2	2	2	2	2								2	2	2	2	2	2	2	2	2	2	2	2	2	2	2	2	2	2	2	2	3	2	3	2	3	3	2	2	2	2	2
1	5	2	4	2	2	4	4	2	2	4	2								2	4	2	2	4	4	2	3	3	4	3	4	4	2	4	4	2	4	4	2	2	1	2	3	2	4	2	3	2	1	2
1	5	2	1	1	1	2	2	2	4	5	5								1	1	1	1	4	4	3	1	3	1	1	1	2	2	2	1	4	2	1	4	1	4	3	1	2	3	4	3	4	5	2
1	5	2	1	3	1	1	2	3	1	2	1								3	4	4	3	4	3	3	4	3	4	4	3	4	2	2	4	2	2	4	2	2	2	2	2	2	2	5	4	3	4	2
1	5	2	1	1	1	3	4	3	4	5	5								1	2	1	1	1	3	3	1	4	3	1	1	3	3	1	1	2	1	1	4	1	4	1	1	1	1	5	4	4	5	1
1	5	2	3	3	2	3	5	2	1	4	1								3	2	2	2	2	3	3	4	3	3	3	2	3	1	3	3	4	3	3	3	2	2	3	4	2	5	2	4	2	2	2
1	5	2	1	1	1	1	1	1	4	4	4								1	1	3	1	1	3	3	1	1	1	1	1	2	1	1	1	3	1	1	5	1	4	1	1	1	1	3	4	1	3	1
1	5	2	1	1	2	5	5	3	4	5	4								1	2	2	2	1	3	3	3	3	2	2	1	2	2	2	1	2	3	1	2	3	4	3	5	3	3	1	4	2	2	2
1	5	2	5	5	2	5	5	5	3	3	2								5	4	3	5	5	5	5	3	5	5	5	5	5	5	2	5	5	2	5	5	2	3	4	4	4	4	2	4	1	4	2
1	5	2	2	2	2	2	2	2	4	4	3								2	4	4	4	2	4	4	4	4	4	2	2	4	4	4	2	3	4	2	2	4	2	4	4	4	4	2	4	2	2	4
1	5	2	4	3	1	3	3	4	3	3	3								2	2	2	2	3	4	4	4	3	2	3	3	3	1	3	3	4	3	2	4	5	1	3	5	5	5	1	5	1	1	5
1	5	2	2	1	2	1	2	2	5	5	1								1	3	2	2	4	4	4	3	4	2	2	2	2	3	2	2	4	3	2	4	1	4	1	1	4	1	5	1	3	4	1
1	5	2	1	1	1	1	1	1	5	5	5								2	2	1	1	2	2	3	1	4	4	2	2	2	1	2	2	1	2	2	1	1	4	1	1	2	2	5	5	2	2	2
1	5	2	2	2	1	3	4	3	5	5	4								1	2	2	2	4	5	5	2	3	4	2	1	3	2	2	2	4	2	3	4	1	4	2	2	2	3	4	4	2	3	2
1	5	2	4	3	5	3	3	3	2	3	1								3	4	1	3	4	3	2	2	3	2	3	3	3	1	1	3	4	1	3	4	5	1	5	5	2	5	1	2	1	1	2
1	5	2	3	3	3	3	3	3	3	3	3								3	3	3	3	3	3	3	3	3	3	3	3	3	2	3	3	2	3	3	3	3	2	3	3	3	3	3	4	3	2	3
1	5	2	2	2	2	2	2	2	2	2	2								2	2	2	2	2	2	2	2	2	2	2	2	2	2	2	2	2	2	2	2	2	2	2	2	2	2	2	2	2	2	2
1	5	2	2	2	2	2	2	2	2	2	2								2	2	2	2	2	2	2	2	2	2	2	2	2	2	2	2	2	2	2	2	2	2	2	2	2	2	2	2	2	2	2
1	5	2	2	2	2	2	2	2	2	2	2								2	2	2	2	2	2	2	2	2	2	2	2	2	2	2	2	2	2	2	2	4	2	2	3	3	4	2	4	2	2	3
1	5	2	2	2	2	2	2	2	2	2	2								2	2	2	2	2	2	2	2	2	2	3	3	3	2	3	3	2	3	3	2	3	2	3	3	3	3	2	4	2	2	3
1	5	1	1	1	1	2	4	1	3	4	5								1	4	3	2	2	4	3	4	4	2	2	1	4	2	2	2	2	2	3	2	1	2	2	2	3	2	4	2	2	4	2
1	5	1	3	3	5	3	3	3	1	3	2								5	5	5	5	4	3	4	4	4	5	5	3	5	1	5	4	1	5	4	1	3	1	5	5	5	5	1	4	1	1	3
1	5	1	2	2	4	4	5	5	3	3	2								2	4	4	2	3	3	3	4	3	3	2	1	3	1	3	2	5	3	2	4	5	1	5	5	3	5	1	5	1	1	5
1	5	1	1	1	2	2	3	3	4	4	4								1	2	2	2	3	2	4	2	4	4	2	1	2	2	3	2	2	4	1	2	1	4	2	2	3	1	5	4	4	4	2
1	5	1	2	2	2	3	3	2	4	4	4								2	3	2	2	2	2	3	4	3	3	3	3	4	3	2	3	3	3	4	4	3	2	3	3	2	4	2	4	2	2	3
1	5	1	1	1	1	1	3	1	4	4	4								1	4	2	2	1	2	1	1	4	2	1	1	2	1	1	1	1	1	1	1	1	4	1	1	2	2	4	4	2	1	1
1	5	1	1	1	2	2	3	2	3	3	4								2	4	4	3	4	4	3	4	4	4	3	3	5	2	4	3	2	4	3	2	2	4	3	3	2	3	4	2	2	3	2
1	5	1	2	2	2	3	3	2	5	3	3								2	3	2	2	2	2	2	3	2	2	2	2	2	1	2	3	5	2	2	5	5	1	5	5	5	5	1	5	1	1	1
1	5	1	2	2	2	2	4	2	2	3	5								2	5	4	2	4	4	4	3	4	2	5	2	4	1	3	4	2	2	3	4	5	1	5	5	3	5	1	5	1	1	5
2	1	1										3	4	3	4	1	2	5	2	3	4	5	3	2	2	1	1	4	4	2	3	1	4	5	2	1	2	3	3	4	3	2	4	2	4	1	2	1	5
2	1	1										3	2	3	5	3	4	2	3	2	3	2	4	3	2	5	5	4	3	3	5	2	4	5	2	2	5	2	2	2	2	4	3	3	2	4	2	3	3
2	1	1										2	2	3	2	3	3	3	3	3	3	2	3	3	3	3	3	3	4	2	4	3	4	4	3	4	4	2	2	3	3	3	3	3	3	3	2	3	3
2	1	1										1	2	2	1	1	1	3	2	2	2	4	3	3	2	2	3	3	4	2	4	3	3	2	3	3	2	3	3	4	3	3	3	2	3	2	3	3	3
2	1	1										3	3	3	3	3	3	2	3	3	3	3	4	3	3	3	3	3	3	3	3	3	3	3	3	3	3	3	3	2	3	3	3	3	2	3	3	3	3
2	1	1										2	2	2	3	1	2	2	2	2	2	2	2	2	2	2	2	3	2	3	2	3	3	3	4	3	3	3	3	2	3	3	3	4	1	3	2	2	3
2	1	1										1	1	4	1	1	1	5	1	1	1	1	1	1	1	1	1	1	2	1	3	3	1	2	2	1	2	2	2	5	3	2	3	3	4	3	2	2	3
2	1	1										1	1	4	1	1	1	4	1	1	1	1	1	1	1	1	1	1	1	1	1	1	1	1	1	1	1	1	1	4	1	1	2	1	4	4	3	4	1
2	1	1										3	3	4	4	1	1	2	2	2	2	2	2	2	2	2	2	2	2	2	2	2	2	2	1	2	2	2	1	1	4	2	1	1	4	2	2	1	4
2	1	1										1	1	4	1	1	1	4	2	2	2	2	2	3	3	2	2	2	2	2	3	3	3	3	3	3	3	3	2	3	2	2	3	3	3	2	3	3	2
2	1	1										1	1	4	1	1	1	4	1	2	2	1	1	2	2	2	2	1	2	1	3	1	3	2	2	3	2	2	2	3	3	3	3	3	3	2	2	2	2
2	1	1										1	1	4	2	1	1	5	2	2	2	2	2	2	2	2	2	2	2	2	2	2	3	2	3	4	2	4	2	3	2	2	3	2	4	4	3	3	3
2	1	1										1	1	1	1	1	1	5	1	1	1	1	1	1	1	1	1	1	1	1	1	4	2	1	4	3	2	4	2	4	1	2	3	2	4	3	3	3	2
2	1	1										2	2	3	2	2	3	3	3	3	3	3	3	3	3	3	3	2	3	2	3	3	3	3	2	2	3	3	2	3	3	3	3	3	3	3	3	3	3
2	1	1										3	2	2	2	2	2	4	2	2	3	3	1	2	3	3	2	2	3	1	2	3	4	2	3	2	3	1	3	3	2	2	2	2	2	2	1	2	3
2	1	1										2	3	4	2	3	2	4	2	3	3	3	3	3	3	3	3	3	3	3	4	3	3	4	3	4	4	4	2	3	3	3	4	3	3	3	2	2	3
2	1	1										1	1	5	1	2	2	4	2	2	2	2	2	3	2	2	4	3	4	2	4	2	4	3	2	4	3	3	3	3	4	4	4	4	2	3	1	2	4
2	1	1										2	2	3	2	2	2	2	1	2	4	3	2	5	5	3	4	3	4	2	5	2	3	4	3	4	5	3	2	3	3	4	4	4	3	2	2	2	2
2	1	1										1	2	5	3	4	5	1	1	2	4	3	1	4	1	5	1	2	1	1	3	1	1	3	5	4	5	1	4	1	3	2	1	5	5	1	2	5	1
2	1	1										2	2	2	1	2	2	2	3	2	3	2	2	3	2	1	2	1	3	2	2	2	2	3	2	2	1	2	4	2	1	2	2	2	2	2	3	3	2
2	1	1										2	2	3	2	1	2	3	2	3	2	2	2	3	2	2	2	2	2	1	2	2	2	2	2	2	2	3	2	3	3	3	3	3	3	3	3	3	3
2	1	1										2	2	4	2	1	1	5	1	2	2	2	1	2	2	2	2	2	2	1	2	2	2	2	3	3	2	2	3	4	2	3	2	2	3	2	3	3	2
2	1	1										1	3	2	3	2	2	3	2	2	2	2	2	2	2	2	3	1	2	3	2	2	2	2	3	2	2	3	2	3	3	3	3	2	3	3	3	3	3
2	1	1										1	1	1	1	1	1	3	1	1	1	1	3	3	1	3	3	3	3	1	3	1	3	2	1	3	3	2	3	2	3	3	4	3	1	2	2	1	3
2	1	1										1	1	4	1	1	1	4	1	1	1	1	1	1	3	1	2	1	1	1	1	3	3	1	2	4	1	2	2	2	2	3	4	2	3	2	2	2	2
2	1	1										3	1	3	1	2	2	2	2	3	2	2	2	1	2	3	1	1	2	3	2	3	2	3	2	1	1	2	2	2	3	3	1	2	2	1	2	2	3
2	1	1										3	3	3	1	3	2	2	4	4	3	3	2	4	4	4	4	3	4	4	2	5	3	4	4	5	3	2	3	3	3	3	4	2	5	3	3	4	4
2	1	1										2	2	3	2	1	2	5	2	2	3	1	2	2	2	3	3	2	2	2	3	2	3	2	2	2	3	2	2	4	3	3	3	3	3	3	2	2	2
2	1	1										1	1	1	1	1	1	1	1	1	1	1	1	1	1	1	1	1	1	1	1	1	1	1	1	1	1	1	1	1	1	1	1	1	1	1	1	1	1
2	1	1										1	1	2	1	1	1	2	2	2	2	2	2	2	2	2	3	2	2	2	3	2	3	2	2	3	3	2	2	4	3	3	3	3	3	4	2	2	2
2	1	1										1	1	4	1	1	1	5	1	4	4	2	2	5	5	5	5	4	1	1	2	1	1	1	2	1	1	2	1	2	1	4	3	3	3	5	1	1	2
2	1	1										1	1	5	1	1	2	5	2	2	1	1	2	3	2	1	1	1	2	1	3	2	2	2	4	2	2	4	3	3	3	3	3	2	1	1	1	1	1
2	1	1										3	1	1	3	3	2	2	3	3	2	3	3	3	1	2	2	3	2	3	3	3	3	3	2	2	1	2	3	2	3	1	2	2	3	1	2	2	1
2	1	1										2	3	4	4	3	4	2	3	3	2	2	3	2	4	3	3	4	3	2	5	1	5	3	2	4	5	2	2	2	2	3	3	2	3	3	2	2	4
2	1	1										2	2	2	2	2	2	3	2	2	2	2	2	2	2	2	2	2	2	2	3	2	3	2	2	2	2	3	3	3	3	3	3	3	3	3	3	3	3
2	1	1										1	1	2	1	1	2	2	2	2	2	3	2	2	2	2	1	3	2	2	3	2	3	1	1	3	1	3	3	1	2	3	2	1	2	2	3	2	2
2	1	1										3	2	2	3	4	2	3	3	3	3	4	4	3	2	3	2	2	3	4	2	2	2	3	3	3	3	2	3	3	4	2	3	2	2	2	3	3	2
2	1	1										1	1	5	1	1	1	5	1	1	1	1	1	1	1	1	1	1	1	1	1	1	1	1	1	1	1	1	3	3	3	3	3	3	3	3	3	3	3
2	1	1										1	1	4	1	1	1	4	1	2	2	1	2	1	2	2	2	2	2	2	4	3	2	2	2	2	2	2	2	3	3	3	3	3	3	3	3	3	2
2	1	1										2	2	4	2	2	2	2	2	3	2	2	2	2	2	2	2	3	2	2	2	2	2	2	2	2	2	2	2	2	2	2	2	2	2	2	2	2	2
2	1	1										3	3	3	3	3	3	3	3	3	3	3	3	3	3	3	3	3	3	3	3	3	3	3	3	3	3	3	3	3	3	3	3	3	3	3	3	3	3
2	1	1										2	2	4	2	2	2	5	2	3	3	3	3	3	2	3	3	3	3	3	4	2	3	3	2	3	3	2	2	3	3	3	3	3	3	3	3	2	3
2	1	1										1	1	5	1	2	1	5	1	1	1	2	2	1	1	1	1	2	1	1	2	1	1	1	2	1	1	2	1	1	1	1	2	1	2	1	2	2	1
2	1	1										4	5	2	5	4	4	1	5	5	5	5	5	5	5	5	5	5	5	5	4	1	1	5	4	1	5	3	5	1	5	5	3	5	1	5	1	1	5
2	1	1										1	1	3	1	1	2	3	1	1	2	1	1	2	2	2	3	1	1	3	2	3	3	2	3	3	2	3	1	3	3	3	3	3	3	3	3	3	3
2	1	1										1	2	1	1	2	2	1	1	1	2	1	1	2	1	1	1	2	1	1	1	1	1	1	1	1	1	1	1	1	1	1	1	1	1	1	1	1	1
2	1	1										1	1	4	1	2	1	5	1	2	2	1	1	2	2	2	2	2	2	1	2	2	3	2	2	3	2	2	2	4	3	3	3	4	3	3	4	4	2
2	1	1										3	1	3	4	2	4	3	4	2	3	3	1	4	2	3	4	2	4	4	3	1	1	3	3	3	4	1	2	1	2	3	4	3	4	3	1	3	3
2	1	1										1	1	4	1	1	1	5	1	2	2	1	2	2	4	2	2	2	1	1	1	3	1	1	3	1	1	3	1	5	1	3	3	1	4	1	4	4	1
2	1	1										1	2	1	1	2	2	1	4	1	2	2	1	3	4	3	2	5	4	1	4	2	1	2	5	3	2	3	4	1	5	5	4	3	4	2	2	2	1
2	1	1										3	1	2	2	2	2	5	3	3	3	3	3	3	3	3	3	3	3	3	3	3	3	3	4	3	3	3	2	5	3	3	3	3	3	3	2	2	3
2	1	1										2	2	4	1	2	3	4	2	2	2	2	2	2	3	3	2	2	3	3	3	3	3	3	3	3	3	3	3	3	3	3	3	2	3	3	3	3	3
2	1	1										2	1	3	2	2	1	2	2	3	2	3	4	3	3	5	3	3	3	1	3	1	4	3	3	3	3	1	3	3	3	3	3	3	2	3	2	2	3
2	1	1										3	2	3	2	1	2	4	2	1	3	2	2	2	2	1	3	3	3	3	3	3	2	3	2	3	2	1	3	2	2	1	3	1	3	3	2	2	2
2	1	1										2	1	1	1	1	2	2	1	1	1	1	1	1	1	1	1	1	1	1	2	3	2	1	2	3	1	2	1	2	2	2	1	2	1	2	2	1	2
2	1	1										1	1	2	1	1	1	2	2	2	1	1	1	1	2	1	2	1	2	2	1	1	2	1	1	1	1	1	1	1	1	2	1	1	2	1	1	2	1
2	1	1										1	1	4	1	2	2	4	2	3	2	2	2	2	3	2	3	3	4	2	4	4	3	2	4	4	4	4	2	5	1	2	2	1	4	5	4	3	2
2	1	1										1	1	5	1	1	1	5	1	1	1	1	1	1	1	1	1	1	2	1	2	2	5	2	4	2	2	2	1	5	1	2	2	1	5	1	5	5	1
2	1	1										1	1	2	3	1	2	3	2	2	2	2	3	2	2	3	1	3	2	3	3	2	2	2	2	2	3	1	2	3	3	1	3	2	3	3	3	2	2
2	1	1										3	2	2	4	2	2	1	3	2	2	2	3	3	2	3	3	2	2	3	2	1	2	3	2	2	2	3	3	1	3	3	3	3	2	3	1	2	2
2	1	1										1	1	3	2	1	2	2	2	3	2	2	2	3	1	3	4	3	2	2	4	2	3	2	3	4	3	3	2	3	3	2	3	2	3	2	1	2	2
2	1	1										1	1	3	1	1	1	5	1	1	1	1	1	2	1	1	2	1	2	1	3	3	3	2	3	3	1	3	1	5	1	1	1	1	5	1	5	5	5
2	1	1										1	1	5	1	1	2	5	1	1	1	2	1	3	2	1	2	3	1	2	2	3	2	2	3	2	2	4	3	3	2	1	3	2	4	2	2	3	3
2	1	1										2	3	4	3	2	2	2	3	3	3	3	4	3	4	3	3	2	4	4	4	3	2	4	3	2	4	3	2	3	3	3	3	3	3	2	2	4	3
2	1	1										2	2	4	2	2	2	3	2	3	2	2	3	3	4	3	4	3	4	2	4	2	4	4	2	4	4	2	3	3	3	3	3	3	3	3	3	3	3
2	1	1										1	1	3	1	1	1	5	1	4	1	1	4	1	1	1	2	2	1	1	2	2	3	1	4	3	1	4	1	4	2	1	3	2	4	2	4	4	2
2	1	1										1	2	3	2	2	2	4	2	2	2	1	2	4	2	2	2	2	2	2	3	2	4	2	2	4	2	2	2	4	2	4	4	4	3	3	2	2	2
2	1	1										1	2	2	1	1	1	2	1	1	1	1	2	2	2	2	2	2	1	1	2	2	3	2	3	2	1	2	1	2	2	2	2	2	2	2	2	1	1
2	1	1										3	2	4	3	2	3	4	3	2	2	3	4	3	2	5	2	4	3	4	2	1	2	3	2	4	5	1	2	2	2	1	2	1	3	2	2	1	1
2	1	1										1	1	4	1	1	1	4	2	2	2	2	2	2	2	2	2	2	3	2	2	2	3	2	3	3	2	4	2	3	2	3	3	2	3	2	3	3	3
2	1	1										1	1	4	2	1	1	4	1	1	1	1	1	1	1	1	1	1	1	1	2	2	1	1	1	1	1	2	1	4	2	1	2	1	3	4	2	2	2
2	1	1										2	2	3	2	3	2	4	2	4	4	4	4	4	4	4	4	4	2	2	4	2	4	4	4	4	4	4	3	1	3	4	3	2	3	4	2	3	4
2	1	1										1	1	3	2	1	1	4	1	3	2	2	2	2	2	3	3	3	2	2	3	3	3	2	4	2	2	4	2	4	2	1	3	2	3	5	3	4	2
2	1	1										1	1	1	1	1	1	1	1	1	1	1	1	1	1	1	1	1	1	1	1	1	1	1	1	1	1	1	1	1	1	1	1	1	1	1	1	1	1
2	1	1										2	2	3	2	2	2	4	2	2	2	2	1	2	2	2	2	2	2	2	3	2	2	2	2	2	2	2	1	4	3	2	2	2	4	1	3	3	2
2	1	1										1	1	5	1	1	1	5	1	1	1	1	1	1	1	1	2	1	1	1	2	4	2	1	4	2	1	5	1	5	3	4	2	4	2	5	2	4	4
2	1	1										2	2	4	2	3	2	4	2	2	3	2	3	3	2	2	3	3	3	2	3	3	3	2	3	2	3	3	2	3	3	3	3	3	3	3	2	2	2
2	1	1										2	2	1	3	2	3	1	4	3	3	3	2	4	4	1	3	4	4	4	4	3	3	2	3	4	3	1	1	3	4	2	2	4	3	4	2	2	1
2	1	1										1	1	5	1	1	1	5	1	2	1	1	2	2	3	3	3	1	2	1	3	3	3	2	3	3	2	3	3	4	3	3	3	3	3	2	3	3	3
2	1	1										2	2	2	2	2	2	2	2	2	2	2	2	2	3	3	2	3	2	2	2	2	2	2	2	2	3	2	2	3	2	2	2	2	3	2	2	2	3
2	2	1										3	1	1	3	4	4	1	4	3	2	2	3	3	3	2	1	3	4	2	1	4	1	2	1	2	2	1	4	2	2	4	3	2	1	1	1	1	3
2	2	1										1	1	3	1	1	1	5	1	3	2	1	2	3	1	2	2	1	1	2	1	1	3	1	3	3	2	2	3	3	3	3	3	4	3	3	1	2	3
2	2	1										1	1	3	3	1	2	5	1	1	1	1	3	3	1	1	3	5	5	1	2	1	3	1	2	3	1	2	1	2	2	3	1	3	4	2	1	3	2
2	2	1										1	1	5	2	1	1	5	1	5	3	1	3	4	3	5	3	3	4	1	3	2	3	1	2	3	2	2	3	3	3	3	3	3	3	3	3	3	3
2	2	1										2	3	3	3	2	2	3	1	2	1	3	2	3	3	1	3	2	3	2	3	3	2	2	2	3	3	3	3	2	3	3	2	3	2	3	2	3	3
2	2	1										2	2	3	2	2	2	4	2	3	3	2	2	2	2	3	2	2	2	2	3	3	2	2	3	3	2	2	3	3	3	3	3	2	3	3	3	3	3
2	2	1										1	1	3	1	1	1	5	1	1	1	1	3	4	4	2	4	3	1	1	1	1	1	1	5	2	1	5	1	5	1	2	2	1	5	5	4	4	1
2	2	1										2	3	5	1	2	3	2	2	3	2	2	3	4	4	3	4	2	4	2	5	2	4	4	3	4	3	3	3	2	3	3	3	4	2	3	2	2	2
2	2	1										1	4	2	2	2	3	2	2	2	2	2	3	3	2	3	2	2	1	2	1	3	2	2	1	3	1	2	2	2	2	2	2	2	2	2	2	2	2
2	2	1										1	1	4	1	1	1	5	1	1	1	1	1	1	1	1	1	1	1	1	1	2	1	1	3	2	1	2	2	4	2	2	3	3	4	3	3	4	2
2	2	1										2	2	3	2	2	2	5	2	1	1	2	2	2	2	5	5	2	2	2	3	3	3	3	3	3	2	3	2	3	4	2	4	3	4	3	3	2	2
2	2	1										1	1	3	1	1	1	5	1	2	2	1	2	2	3	2	2	2	2	1	3	3	2	1	4	2	1	4	2	4	3	3	3	3	3	2	3	4	3
2	2	1										2	2	3	2	1	2	3	2	3	3	2	2	3	3	3	3	3	3	2	4	1	4	3	2	3	4	2	2	2	2	3	3	2	3	3	3	3	2
2	2	1										2	2	4	2	2	2	4	2	4	4	2	2	2	2	4	4	2	2	2	4	2	2	2	2	4	4	2	2	2	2	4	4	4	3	4	2	2	2
2	2	1										1	1	3	1	1	1	4	1	2	2	2	2	2	2	2	2	2	2	2	3	2	3	1	2	3	2	3	2	4	3	3	3	3	3	3	1	3	2
2	2	1										1	1	3	1	1	1	2	2	1	2	2	4	4	4	1	2	2	2	2	1	2	2	1	4	2	1	2	2	4	3	2	2	3	3	3	3	2	3
2	2	1										1	1	2	1	1	4	4	1	2	3	2	2	4	4	2	4	2	2	1	2	1	2	2	2	2	2	2	1	3	2	1	2	2	4	2	3	4	2
2	2	1										1	1	4	1	1	1	3	2	2	2	2	2	2	2	2	2	2	2	2	2	2	2	2	3	3	2	3	2	4	2	3	3	2	3	3	3	3	2
2	2	1										1	1	4	1	1	2	4	2	2	2	1	2	3	3	2	3	2	2	2	2	2	2	2	2	3	2	3	2	3	2	2	4	3	4	3	4	3	3
2	2	1										1	1	2	1	2	1	3	1	3	2	2	3	4	4	3	4	4	2	2	4	3	2	4	2	4	3	3	2	3	3	1	3	1	3	3	2	3	3
2	2	1										1	1	4	2	2	2	4	2	2	2	2	3	2	3	3	4	2	4	1	3	2	3	3	2	2	3	2	1	4	2	3	2	2	4	2	4	4	2
2	2	1										1	1	3	1	1	1	5	1	1	1	1	1	2	1	1	1	1	2	2	3	3	3	2	4	3	2	4	3	3	2	3	3	3	3	3	2	2	2
2	2	1										1	1	5	1	1	1	5	1	1	1	1	1	1	2	1	1	1	1	1	2	2	2	1	3	3	1	4	2	3	3	3	3	3	3	4	3	3	3
2	2	1										1	1	3	1	1	1	4	1	2	2	2	3	3	3	2	3	2	2	2	3	2	3	3	4	3	2	3	3	2	3	3	3	3	3	3	2	3	3
2	2	1										1	2	4	2	1	1	4	2	3	2	2	2	3	3	4	3	2	3	2	3	4	3	2	4	4	3	4	2	4	2	2	2	2	4	4	3	4	2
2	2	1										1	2	5	1	2	1	5	1	4	2	2	3	3	2	3	2	3	1	1	2	3	3	2	5	2	2	5	2	5	3	3	3	3	3	1	3	3	2
2	2	1										3	3	3	3	3	3	1	3	4	4	3	3	3	4	4	3	3	3	3	5	3	3	3	2	3	3	3	3	1	3	3	3	3	3	3	3	1	3
2	2	1										1	2	4	1	1	1	5	1	2	1	2	1	2	2	2	3	3	1	1	2	4	3	1	2	3	1	2	1	5	2	2	2	1	5	5	3	4	3
2	2	1										1	1	4	1	2	2	5	2	5	4	2	2	5	4	4	4	4	4	2	4	4	3	2	4	4	3	4	2	5	2	4	3	2	4	5	2	2	2
2	2	1										1	1	5	1	1	1	5	1	2	2	2	3	3	3	2	3	2	1	1	3	3	2	2	4	3	2	4	2	5	2	2	2	1	3	3	4	3	2
2	2	1										2	3	3	3	2	2	3	2	3	2	2	4	4	4	2	2	4	4	4	4	2	3	3	4	3	4	3	2	2	3	3	3	2	3	2	2	2	3
2	2	1										2	2	3	2	3	2	2	3	2	2	2	3	3	3	3	3	2	2	2	2	3	3	2	2	2	2	3	3	3	2	3	2	2	3	2	3	3	3
2	2	1										1	1	2	1	2	1	4	2	2	2	1	2	2	2	2	2	2	3	1	3	2	3	2	4	3	2	3	2	4	3	2	3	2	3	3	3	3	2
2	2	1										1	1	5	1	1	2	5	1	3	2	2	1	3	3	2	2	3	1	1	2	1	3	2	2	3	2	2	2	3	3	3	3	3	3	3	3	3	3
2	2	1										1	1	3	1	1	1	4	1	3	2	2	2	4	2	3	4	4	3	1	2	2	2	2	3	2	1	3	2	2	3	3	3	2	3	2	3	2	3
2	2	1										1	1	4	1	1	1	5	2	2	2	2	2	2	2	2	2	2	1	2	1	2	1	1	3	2	1	3	4	4	3	3	4	1	3	5	3	3	2
2	2	1										1	1	1	1	1	1	1	1	1	1	1	1	3	4	1	3	3	3	1	4	1	4	5	3	5	2	3	3	3	3	3	3	3	3	3	3	3	3
2	2	1										1	1	5	1	1	1	5	1	2	1	1	1	1	2	1	1	2	1	1	1	3	1	1	5	1	1	5	1	5	1	1	3	1	4	1	2	4	1
2	2	1										1	1	3	1	1	2	5	1	4	2	1	3	3	2	2	2	3	3	2	5	2	4	2	4	4	3	4	1	5	2	3	2	2	4	2	3	4	2
2	2	1										2	2	2	1	4	1	3	1	2	2	2	1	1	3	1	2	3	3	2	1	2	1	1	1	1	2	3	1	2	3	4	3	1	2	2	2	1	3
2	2	1										2	2	3	2	1	2	5	1	2	2	2	1	3	2	3	2	1	3	2	4	3	2	1	3	2	2	2	2	4	2	3	3	3	3	2	2	3	2
2	2	1										1	1	1	1	1	1	1	1	1	1	1	2	1	1	1	1	2	2	1	1	1	2	1	3	2	2	4	2	4	1	2	2	2	4	1	2	4	2
2	2	1										2	2	3	2	2	2	3	2	3	3	2	3	3	4	3	3	3	3	2	4	2	4	3	3	4	4	2	2	3	2	3	3	2	3	3	3	3	3
2	2	1										1	1	4	1	1	1	5	1	4	3	2	3	3	3	3	3	4	3	2	3	2	3	3	3	4	4	3	2	4	3	3	2	2	2	3	2	1	2
2	2	1										3	1	4	1	2	2	5	1	3	3	3	4	5	2	3	4	5	5	2	5	5	5	4	2	5	5	2	3	4	3	3	3	3	3	3	3	3	3
2	2	1										1	1	5	1	1	1	5	1	2	2	2	1	2	2	2	3	3	2	2	3	2	3	2	2	3	2	2	1	4	2	1	2	2	5	4	3	4	3
2	2	1										2	2	5	2	2	2	3	2	3	2	2	2	3	3	3	3	3	2	2	3	2	3	2	2	3	2	2	2	2	4	4	3	4	2	4	2	1	4
2	2	1										1	1	4	2	1	1	4	2	3	2	2	3	3	4	2	3	3	4	2	3	2	3	3	2	2	2	3	2	2	3	5	2	3	2	2	2	3	3
2	2	1										2	2	4	2	2	2	3	3	3	3	3	3	3	3	3	3	3	5	2	4	3	4	4	2	4	3	2	2	3	2	3	3	3	3	3	3	3	3
2	2	1										1	1	5	1	1	1	1	1	1	1	1	3	2	1	1	4	3	1	1	1	2	1	1	5	1	1	5	1	5	1	1	2	1	5	5	5	5	1
2	2	1										1	1	5	1	1	1	4	1	3	3	2	1	4	3	2	3	2	2	1	3	2	2	2	4	2	2	2	1	2	1	1	2	1	5	5	2	3	1
2	2	1										1	1	4	1	1	2	4	1	2	2	1	2	1	2	2	2	2	2	2	3	1	3	3	2	3	2	1	5	5	5	5	5	5	1	1	1	1	2
2	2	1										1	1	3	1	1	2	4	2	3	2	2	2	4	3	2	3	4	3	2	2	2	3	2	3	4	2	3	2	2	3	3	3	3	3	4	2	2	2
2	2	1										1	1	5	1	1	1	5	1	5	3	3	3	3	5	5	5	3	3	3	3	5	5	4	5	5	4	5	1	5	1	1	1	1	5	5	5	5	2
2	2	1										3	3	3	3	3	3	3	3	3	4	3	4	3	3	3	3	3	3	3	3	3	3	3	3	3	3	3	3	3	3	3	3	3	3	3	3	3	3
2	2	1										1	2	4	2	2	2	4	1	2	2	1	2	2	1	2	2	2	2	2	2	3	3	2	4	3	2	4	2	2	2	3	3	2	3	2	2	2	2
2	2	1										1	1	3	4	3	3	3	1	3	3	1	1	3	2	2	3	2	2	2	3	2	3	2	3	3	2	4	2	4	2	3	3	2	4	5	3	3	2
2	2	1										1	1	3	1	1	2	4	1	2	1	2	2	3	4	2	3	3	2	1	3	3	3	2	4	2	2	4	2	2	3	2	3	2	4	4	2	3	3
2	2	1										1	1	5	1	1	1	5	1	1	1	1	1	1	1	1	1	1	1	1	1	1	2	1	3	3	1	4	1	5	2	1	2	1	3	2	3	3	2
2	2	1										3	2	3	2	3	2	4	3	3	2	2	3	3	3	4	4	3	4	3	4	3	4	4	3	4	3	4	3	3	3	4	4	4	3	2	2	2	3
2	2	1										1	1	3	2	2	2	4	2	2	2	2	2	2	2	2	2	2	2	1	1	1	2	1	2	1	1	2	2	4	3	2	2	1	2	5	2	2	2
2	2	1										1	1	3	1	2	2	4	2	3	2	2	2	4	2	2	3	3	3	3	3	2	2	2	2	2	3	2	2	3	3	2	2	2	4	2	3	4	2
2	2	1										1	1	3	2	1	2	2	2	3	3	2	5	5	4	2	3	3	3	3	4	2	4	3	3	2	4	3	2	4	3	2	2	3	3	3	3	4	2
2	2	1										1	1	4	1	1	2	5	1	1	1	1	3	2	3	1	4	2	1	1	1	3	2	1	2	2	1	4	1	4	1	1	2	1	5	5	3	5	1
2	2	1										2	2	4	2	2	2	4	2	2	2	2	2	2	2	2	3	3	2	2	3	2	3	2	2	2	3	2	2	2	3	4	3	4	4	4	2	2	3
2	2	1										1	2	2	2	2	2	2	2	2	2	2	3	2	3	3	2	2	3	3	3	3	3	3	3	3	3	3	3	3	3	3	3	3	3	3	3	3	4
2	2	1										1	1	5	1	1	1	5	1	3	2	1	4	3	3	2	4	4	2	2	2	3	3	2	4	2	2	2	2	4	3	3	4	1	4	3	4	4	3
2	2	1										1	1	3	1	3	2	1	3	3	1	2	2	3	2	2	2	2	3	2	2	1	2	2	2	2	2	1	4	1	3	3	3	3	2	3	1	2	3
2	2	1										2	2	3	2	3	2	2	2	3	2	2	3	3	2	2	2	2	3	2	4	3	3	3	2	3	2	2	2	2	2	3	3	4	2	2	2	2	3
2	2	1										2	2	3	2	2	3	3	2	3	3	2	2	4	3	3	3	4	3	2	4	2	4	4	2	4	3	3	2	3	2	2	3	3	3	3	3	3	2
2	2	1										1	1	4	1	1	2	5	2	2	2	2	2	3	2	2	2	2	2	2	2	2	2	2	2	2	2	3	2	3	3	3	3	2	2	2	2	1	2
2	2	1										2	2	3	2	1	2	3	2	2	2	1	2	2	2	2	3	3	3	2	4	1	2	3	2	2	3	2	2	3	3	3	2	3	3	3	2	2	3
2	2	1										1	1	3	2	2	2	4	2	3	2	2	3	3	2	2	2	2	2	2	3	3	4	3	3	4	3	3	2	4	2	3	3	3	3	4	2	3	2
2	2	1										1	1	3	1	3	1	4	1	4	4	3	2	4	3	3	3	3	3	2	4	3	3	3	3	3	4	4	2	4	3	2	3	2	3	2	1	3	3
2	2	1										1	1	3	1	1	1	5	2	2	2	1	2	2	2	2	3	2	2	2	2	3	2	2	3	3	2	2	3	3	3	3	3	3	2	2	2	2	3
2	2	1										3	3	3	3	3	3	2	3	3	3	3	3	3	4	3	3	3	3	3	4	3	3	4	3	3	4	3	2	2	3	3	3	3	3	4	2	3	3
2	2	1										2	1	3	3	3	2	2	2	1	2	1	3	4	3	2	3	2	3	2	4	4	4	2	4	4	3	4	4	3	2	3	3	3	3	4	3	3	3
2	2	1										1	1	3	1	2	2	4	1	1	1	1	2	3	1	2	2	2	1	2	1	4	3	1	4	2	2	4	2	4	3	2	3	2	3	3	3	4	2
2	2	1										2	2	2	2	2	4	2	2	2	2	2	2	3	2	2	2	3	2	3	4	3	2	3	2	2	4	2	2	4	4	2	2	2	4	4	2	3	2
2	8	2										2	3	3	2	1	4	3	2	2	2	2	3	3	2	2	4	4	4	3	4	2	4	3	2	4	3	2	2	1	3	2	2	3	2	3	1	2	2
2	8	2										1	2	4	2	3	4	4	2	2	2	1	3	3	2	2	3	2	2	2	3	3	3	2	1	3	2	1	1	2	4	3	3	3	2	3	1	1	2
2	8	2										2	2	2	2	2	2	4	2	2	2	2	2	2	2	3	3	2	2	2	3	2	3	2	2	3	2	4	2	4	2	4	2	3	2	3	2	2	2
2	8	2										2	2	5	2	2	2	4	2	2	2	2	2	2	2	2	2	2	2	2	2	2	3	2	2	3	2	2	3	2	3	4	2	4	2	2	2	1	2
2	8	2										2	2	3	2	2	2	4	2	2	2	2	2	3	3	4	3	2	2	3	3	2	3	4	4	3	3	4	4	4	3	4	3	3	2	2	1	1	3
2	8	2										1	2	3	2	1	2	4	1	1	2	1	1	2	2	3	2	2	2	1	2	2	3	2	5	3	1	5	2	4	2	3	3	2	2	2	4	3	2
2	8	2										1	1	4	1	1	1	5	1	2	2	1	1	1	2	2	2	2	2	1	2	2	2	2	4	2	2	4	2	3	4	4	3	4	2	3	2	2	2
2	8	1										3	3	3	3	3	3	3	3	4	2	3	3	3	3	2	3	3	3	3	3	2	5	3	3	3	3	3	2	4	3	4	3	3	4	2	4	3	3
2	8	1										1	1	5	1	1	1	5	1	1	1	1	1	1	2	1	2	3	1	1	1	4	1	1	4	2	1	4	1	5	1	1	2	2	5	1	4	4	3
2	8	1										1	2	4	1	1	2	4	1	3	3	3	3	4	4	3	3	4	4	2	3	2	3	2	2	3	2	2	2	3	3	3	2	2	3	3	2	3	2
2	8	1										1	1	4	2	1	1	4	2	2	2	1	2	2	2	2	3	2	2	2	2	2	4	2	2	3	2	4	4	2	3	4	3	4	2	3	1	2	3
2	8	1										3	3	3	3	3	3	2	3	4	3	3	3	4	3	4	3	3	3	3	4	3	4	4	3	3	4	3	3	3	3	3	3	3	3	3	3	3	3
2	8	1										2	2	4	2	2	2	4	2	3	2	3	2	2	3	3	3	3	2	2	2	4	3	2	4	4	2	4	2	2	3	4	3	3	2	3	2	2	3
2	8	1										2	4	5	4	2	3	1	3	5	5	3	3	5	4	5	4	4	5	2	4	3	2	4	2	2	4	2	2	2	3	2	3	4	4	1	2	3	4
2	8	1										1	1	5	1	1	2	4	2	2	1	1	1	1	1	1	3	2	1	1	2	1	2	2	1	1	2	1	5	1	1	5	5	5	1	1	1	1	5
2	8	1										1	1	5	1	1	1	5	1	1	1	1	1	1	2	2	2	3	1	1	1	1	3	1	4	2	1	4	2	1	3	5	2	5	1	1	1	1	2
2	8	1										1	1	3	1	1	1	5	1	1	1	1	1	1	1	1	1	1	3	1	4	4	4	2	4	4	2	4	2	4	3	3	3	3	3	3	3	3	3
2	8	1										1	2	4	1	1	2	4	1	2	2	1	2	2	2	2	3	2	2	2	3	4	2	2	3	3	2	3	2	3	2	2	4	2	4	2	2	3	2
2	8	1										1	2	3	1	1	2	2	2	2	3	2	2	2	2	3	3	2	2	2	3	2	2	2	2	3	2	2	2	1	2	4	3	3	1	2	1	1	2
2	8	1										1	2	4	1	1	2	2	2	2	2	2	3	4	3	3	4	4	2	3	4	4	3	2	3	2	4	2	2	4	3	3	4	3	2	2	2	2	3
2	8	1										1	1	3	1	1	2	3	1	2	2	1	1	1	2	2	2	1	2	2	3	2	3	2	2	2	2	1	2	1	5	5	3	5	1	4	1	1	2
2	8	1										3	3	3	2	2	2	4	2	3	2	2	3	3	2	2	2	2	3	3	3	2	3	3	3	3	2	3	3	3	3	3	3	3	3	3	3	3	3
2	8	1										1	1	1	1	1	1	5	1	4	1	1	1	1	1	1	1	1	2	1	2	1	4	1	1	1	1	1	5	1	5	5	5	5	1	1	1	1	5
2	8	1										1	2	4	1	2	3	4	1	2	3	2	2	3	3	3	3	2	3	2	4	2	3	3	3	3	3	2	2	3	3	3	3	3	3	3	2	2	3
2	8	1										1	1	3	1	1	1	3	2	3	3	2	2	3	2	3	2	2	3	2	3	2	3	3	2	3	3	2	2	3	3	3	3	3	2	3	1	1	3
2	8	1										1	1	5	1	1	1	5	2	3	2	2	2	3	3	4	4	3	2	3	3	1	4	2	1	4	2	1	2	1	5	5	1	5	1	1	1	1	5
2	8	1										1	1	4	1	2	2	4	2	4	3	2	3	4	4	2	4	3	3	2	5	2	4	3	2	4	5	2	2	3	3	3	2	2	4	3	2	4	3
2	7	2										1	1	5	1	1	1	5	1	1	1	1	1	2	2	1	2	1	1	1	1	3	2	1	1	2	1	2	1	5	1	2	1	1	5	5	2	3	1
2	7	2										2	1	3	2	1	1	3	2	2	1	2	2	3	3	2	3	2	3	2	3	1	2	3	3	2	3	3	3	3	3	3	3	3	2	3	2	3	3
2	7	2										2	3	5	3	3	5	3	3	3	2	3	3	3	3	3	3	3	5	3	5	1	5	5	1	5	5	1	5	1	5	5	5	5	1	5	1	1	5
2	7	2										1	1	5	1	1	1	5	1	1	1	2	2	1	3	1	2	2	1	1	1	2	4	1	3	2	1	4	1	5	1	1	2	1	5	5	2	2	3
2	7	2										1	1	5	1	1	2	5	1	1	1	1	1	2	1	1	2	1	1	1	1	2	2	1	2	1	1	4	1	3	1	1	1	1	5	5	3	5	1
2	7	2										1	1	5	1	1	2	4	1	1	1	1	2	3	4	1	1	3	1	1	1	4	1	1	2	2	1	2	1	5	1	2	1	1	4	1	2	5	1
2	7	2										1	1	5	1	1	2	5	1	2	1	1	1	3	2	2	3	2	2	1	1	2	4	2	1	4	1	4	1	5	1	1	1	1	5	5	3	4	1
2	7	2										1	1	4	1	1	1	4	1	2	2	1	1	2	2	2	2	1	1	1	2	2	2	1	1	2	1	2	1	4	2	2	2	1	4	4	4	5	2
2	7	2										1	1	5	1	1	3	5	1	1	1	1	1	2	2	1	2	2	1	1	1	2	2	1	1	3	1	2	1	5	1	1	1	1	5	5	2	5	2
2	7	2										1	1	5	1	1	1	5	1	1	1	1	1	1	1	1	1	1	1	1	4	2	1	1	5	1	1	4	1	5	1	1	2	1	5	5	2	5	3
2	7	2										1	1	3	1	1	1	3	1	1	1	1	1	1	2	1	1	1	2	1	4	3	3	1	4	3	1	2	1	4	1	2	2	1	4	1	2	2	3
2	7	1										1	1	1	1	1	1	2	2	2	2	2	3	3	1	2	1	3	3	3	2	2	2	2	2	3	2	2	2	2	3	3	2	2	3	1	2	2	2
2	7	1										1	1	4	1	1	1	5	1	2	1	1	1	1	1	2	2	2	2	1	2	1	2	1	4	2	2	4	1	1	4	2	4	3	3	2	1	1	1
2	7	1										2	2	4	2	2	2	4	2	2	2	2	4	4	4	2	4	4	3	2	3	2	4	3	4	4	3	4	2	3	3	3	3	3	3	4	2	3	2
2	7	1										1	1	3	1	1	2	4	2	2	2	2	2	2	2	2	2	2	2	2	2	2	3	2	3	3	2	3	2	2	3	3	3	3	3	3	2	2	4
2	7	1										1	1	5	1	1	1	1	1	1	1	1	2	2	2	1	2	1	1	1	2	1	1	1	2	1	1	2	1	5	2	2	3	2	3	3	3	4	1
2	7	1										1	2	4	1	2	3	4	2	2	2	2	1	2	3	2	2	1	2	2	3	2	2	2	4	2	2	4	2	4	2	3	3	3	3	4	4	3	3
2	7	1										2	3	3	2	2	1	4	2	3	3	3	2	2	2	2	3	3	3	2	3	2	3	3	2	3	3	3	3	1	3	5	5	3	2	3	1	1	3
2	7	1										2	2	3	2	2	2	3	2	3	2	2	2	3	2	3	2	2	4	2	4	4	3	3	3	3	3	4	4	2	4	4	5	3	3	4	2	2	4
2	7	1										1	1	3	1	1	1	5	1	3	2	2	3	2	4	2	4	4	3	1	2	2	3	2	2	3	2	2	2	2	2	4	3	3	2	2	2	2	2
2	7	1										2	2	3	2	1	2	4	1	1	2	2	2	2	2	2	2	2	2	2	3	3	3	2	3	3	2	4	2	4	1	2	3	2	3	2	3	4	2
2	7	1										1	1	5	1	1	1	5	1	1	1	1	1	4	3	1	4	1	1	1	1	4	4	1	4	3	3	4	1	5	2	3	2	2	4	4	4	4	1
2	7	1										2	2	3	2	3	3	3	2	3	3	3	3	3	3	3	3	3	3	3	3	3	3	3	3	3	3	3	3	3	3	3	3	3	3	3	3	3	3
2	7	1										2	2	3	2	3	3	3	2	3	3	3	3	3	3	3	3	3	3	2	3	2	3	3	2	3	3	1	3	3	3	3	3	3	3	3	2	2	3
2	7	1										1	1	1	2	1	1	5	1	3	4	2	4	3	4	3	4	4	2	1	2	2	4	2	4	3	1	4	2	2	2	3	2	2	2	2	1	2	2
2	7	1										1	1	5	1	1	1	5	1	2	2	1	2	2	1	1	2	2	1	1	2	1	1	2	1	2	1	1	2	4	2	3	3	3	3	4	3	3	2
2	7	1										1	1	1	1	1	1	1	1	1	1	1	1	1	1	1	1	1	1	1	1	1	1	1	1	1	1	1	1	1	1	2	1	1	1	1	1	1	1
2	7	1										2	2	2	2	2	2	4	2	2	2	2	2	2	2	2	2	2	2	2	3	2	2	2	2	2	2	2	3	3	3	4	3	3	3	3	3	3	3
2	7	1										1	1	3	1	1	1	5	1	3	1	1	1	3	1	1	1	1	1	1	1	1	3	1	1	3	1	3	2	3	3	3	3	4	3	3	2	1	3
2	7	1										2	2	3	2	2	2	2	3	2	2	2	3	3	3	2	3	3	3	3	4	3	3	3	3	4	2	2	2	3	3	3	3	3	3	3	3	3	2
2	7	1										1	4	3	4	3	4	2	1	1	1	2	2	2	4	1	4	3	2	1	3	1	2	2	1	2	2	1	4	1	3	2	3	4	3	1	1	1	4
2	3	2										1	3	2	1	2	2	4	2	2	2	2	2	2	2	2	2	2	2	3	2	2	3	3	4	3	4	4	4	5	2	2	2	1	4	4	4	4	1
2	3	2										5	5	2	5	4	3	4	5	3	4	4	3	3	3	4	3	4	4	5	3	5	4	4	5	4	4	5	3	3	3	3	2	3	3	3	4	4	4
2	3	2										2	2	1	2	2	3	1	2	2	2	2	3	3	4	2	4	4	5	3	3	1	3	2	4	3	3	1	1	2	1	2	1	1	5	2	1	3	1
2	3	2										1	1	5	1	1	1	5	1	1	1	1	1	1	1	1	1	1	1	1	1	2	2	1	3	2	1	3	1	5	4	4	3	5	2	1	1	2	3
2	3	2										1	1	5	1	1	1	5	1	1	1	1	1	1	1	1	1	1	1	1	1	1	3	1	1	3	1	1	1	5	1	1	1	1	5	5	5	5	5
2	3	2										1	1	5	1	1	5	5	1	1	1	3	3	1	3	1	1	3	2	3	1	3	5	2	5	3	2	5	1	1	1	1	5	1	5	1	1	3	1
2	3	2										1	1	5	1	1	1	5	1	1	1	1	1	1	1	1	1	1	1	3	1	1	3	1	3	3	1	3	1	3	1	1	1	1	5	1	1	5	1
2	3	2										1	1	4	1	1	1	4	1	1	1	1	3	1	1	1	1	1	1	4	1	4	4	1	4	4	1	4	1	1	1	1	1	1	4	1	1	3	1
2	3	2										1	1	3	1	1	1	2	1	2	1	1	1	1	1	1	1	1	3	1	1	1	3	1	3	3	1	1	1	3	1	1	1	1	3	1	2	2	1
2	3	2										1	1	1	1	1	1	1	1	1	1	1	1	1	1	1	1	1	4	3	4	1	3	4	1	4	4	1	5	1	5	1	1	5	1	5	1	1	5
2	3	2										1	1	1	1	1	1	1	3	2	2	2	3	3	2	2	3	2	4	3	4	2	3	4	2	3	3	2	3	2	4	4	2	4	2	4	2	2	2
2	3	2										1	1	4	1	1	1	4	1	1	1	1	2	1	2	1	2	4	1	3	1	3	3	1	3	3	1	4	1	2	2	1	2	1	3	2	1	3	2
2	3	2										1	1	4	1	1	1	4	1	1	1	1	3	1	1	3	1	1	2	3	2	2	3	3	3	3	2	3	3	2	2	3	2	2	3	3	2	2	2
2	3	2										1	1	4	1	1	1	4	1	1	1	1	1	1	1	1	1	1	1	4	1	4	1	1	4	1	1	4	2	2	2	2	2	1	3	1	2	1	1
2	3	2										1	1	4	1	1	1	4	1	1	1	1	3	3	2	1	2	3	3	1	3	1	3	1	4	3	1	3	1	1	1	1	3	1	3	1	1	1	1
2	3	2										1	1	4	1	1	1	4	1	1	1	1	1	2	3	1	3	3	2	2	2	3	3	2	2	3	2	3	1	1	3	3	1	2	3	1	1	1	2
2	3	2										1	1	3	1	1	1	3	1	2	2	2	2	3	3	2	3	3	3	2	3	2	2	2	2	2	2	3	1	1	3	1	3	1	3	1	1	1	1
2	3	2										1	1	4	1	1	1	4	2	1	3	1	2	3	1	2	2	2	2	3	2	2	3	2	2	3	2	2	2	1	1	1	1	2	2	1	1	1	2
2	3	2										1	1	4	1	1	1	4	1	1	1	4	1	1	4	1	1	1	1	1	1	1	3	1	3	3	1	1	1	1	1	1	3	1	1	1	1	1	1
2	3	2										1	1	1	1	1	1	1	1	1	1	1	1	1	1	1	1	1	1	1	1	1	3	1	4	3	1	4	1	1	1	1	1	1	1	1	1	1	1
2	3	2										1	1	5	1	1	1	5	1	1	1	1	3	3	1	1	3	3	1	1	2	1	2	1	5	1	1	1	1	1	1	1	1	5	4	1	1	4	1
2	3	2										1	1	4	1	1	1	4	2	2	1	2	3	2	3	2	3	3	2	2	2	2	3	2	4	3	2	4	1	3	2	2	3	2	3	1	2	1	1
2	3	2										1	1	4	1	1	1	4	2	1	2	1	3	1	2	1	3	3	2	2	2	2	4	2	4	4	2	4	1	1	1	1	3	1	3	1	1	1	1
2	3	2										1	1	4	1	1	1	4	1	2	2	3	1	1	1	2	3	3	1	2	1	2	2	1	3	2	1	2	2	3	1	1	3	1	3	2	1	2	2
2	3	2										1	1	3	1	1	1	3	2	2	2	2	2	3	3	2	3	2	2	2	2	2	3	2	3	3	2	3	1	3	2	2	2	1	3	2	1	1	1
2	3	2										1	1	3	1	1	1	3	1	1	1	2	3	1	1	1	3	3	1	2	1	1	3	1	1	3	1	2	1	1	1	1	1	1	1	1	1	1	1
2	3	2										1	1	4	1	1	1	4	1	2	1	2	3	3	3	1	1	2	2	1	2	1	3	2	1	3	1	3	1	2	2	3	3	1	1	1	1	1	1
2	3	2										5	5	5	5	5	5	5	1	1	1	1	1	2	1	3	3	1	1	1	1	1	1	1	2	1	1	2	1	1	1	1	3	1	5	1	5	2	1
2	3	2										1	1	1	1	1	1	1	1	1	1	1	1	1	1	3	3	2	1	1	2	1	3	1	3	3	1	5	1	2	1	5	5	4	5	3	1	1	2
2	3	2										5	5	5	5	1	3	4	1	1	1	1	1	3	3	1	3	3	1	1	2	4	3	2	4	3	2	4	1	3	2	4	1	1	4	1	2	4	3
2	3	2										1	1	4	1	1	2	4	1	1	1	1	1	2	4	1	2	1	1	1	2	3	1	1	2	3	1	2	1	4	1	1	1	1	5	5	3	2	3
2	3	2										1	1	4	1	1	1	5	1	1	1	1	2	1	1	1	2	1	1	1	1	3	1	1	1	2	1	1	1	4	2	3	3	3	3	5	1	3	3
2	3	2										1	3	5	3	1	1	4	1	2	1	2	2	2	3	2	2	2	2	2	4	3	3	2	4	3	3	4	3	3	4	4	3	4	3	4	4	3	4
2	3	2										1	1	4	1	1	1	4	2	2	2	2	2	3	3	2	2	2	2	2	2	3	3	2	3	3	2	2	2	2	2	4	2	2	2	2	2	2	4
2	3	2										1	1	4	1	1	1	4	2	2	2	2	3	2	3	2	2	2	2	2	2	2	3	2	2	3	2	2	1	1	4	4	1	1	3	4	1	1	2
2	3	2										1	1	4	1	1	4	4	1	2	1	2	2	2	2	2	2	2	1	2	2	2	3	1	3	3	1	3	1	2	4	2	3	4	3	4	1	2	2
2	3	2										1	1	4	1	1	1	4	1	1	1	1	1	1	1	1	1	1	1	1	1	1	3	1	5	3	1	5	1	3	3	3	3	2	4	2	1	1	1
2	3	2										1	1	4	1	1	1	4	1	1	1	1	2	2	3	1	1	1	1	1	1	3	3	1	4	4	1	4	1	1	1	3	3	1	3	3	1	1	1
2	3	2										2	1	4	2	1	2	4	2	2	2	2	2	2	2	2	2	2	1	2	2	3	3	3	2	3	2	2	1	2	2	4	1	3	2	2	4	2	2
2	3	2										1	1	3	1	1	1	5	1	1	1	1	2	1	2	1	1	3	2	2	1	1	1	1	3	3	1	2	2	2	2	1	2	2	3	2	2	2	1
2	3	1										2	2	3	2	3	2	4	2	4	2	2	2	3	2	3	3	2	2	2	3	3	2	2	3	2	2	3	3	1	3	4	3	4	2	4	1	2	4
2	3	1										3	2	3	2	2	3	1	4	4	4	2	4	4	4	4	4	4	4	4	5	4	3	5	2	4	4	3	2	1	3	4	5	3	3	3	2	1	2
2	3	1										1	1	3	1	3	2	2	2	1	1	1	2	2	2	2	2	3	4	2	4	1	4	3	1	2	3	1	2	2	3	4	3	4	3	4	1	2	2
2	3	1										1	1	4	2	2	1	5	2	2	1	2	2	3	2	2	2	2	2	2	3	3	4	2	4	4	2	4	3	1	3	4	2	4	2	1	1	1	2
2	3	1										2	2	3	2	4	4	3	2	3	2	2	2	2	2	2	2	2	5	4	4	2	4	4	2	2	4	4	4	1	5	5	4	3	1	1	1	1	4
2	3	1										1	1	1	1	1	1	3	2	4	4	2	3	3	2	4	3	2	3	2	5	4	4	3	2	4	4	5	2	3	3	3	3	3	3	3	3	3	3
2	3	1										1	1	1	1	1	1	4	1	1	1	1	1	1	1	1	1	1	1	1	1	1	1	1	1	1	1	1	3	3	3	5	5	5	2	3	1	1	1
2	3	1										5	5	5	5	5	5	5	1	1	1	1	1	1	1	1	1	1	1	1	1	1	1	1	1	1	1	1	1	1	1	1	1	1	1	1	1	1	1
2	3	1										1	1	5	1	1	1	5	1	1	1	1	2	2	2	1	4	3	3	1	2	3	3	3	4	3	3	5	2	5	3	3	4	4	3	5	2	2	2
2	3	1										1	1	4	1	2	2	4	1	2	2	2	2	3	2	2	2	2	3	3	2	2	3	2	2	3	4	2	2	4	2	3	3	3	4	4	2	2	3
2	3	1										2	2	3	2	3	3	4	2	2	2	2	2	2	2	2	2	2	2	3	3	2	2	2	2	2	2	2	2	3	3	3	3	3	3	3	2	3	2
2	3	1										1	1	3	1	1	1	5	1	3	1	1	1	3	1	1	3	1	1	1	3	2	4	2	4	4	2	3	1	5	1	1	1	1	5	5	5	5	1
2	3	1										2	3	4	2	2	2	4	2	2	2	2	2	2	2	2	2	2	3	2	4	2	3	2	4	2	2	3	5	1	5	5	1	5	1	5	1	1	3
2	3	1										1	2	4	2	1	1	4	2	3	2	2	2	3	3	2	3	3	2	2	2	2	2	2	2	2	2	2	1	4	3	3	3	3	2	3	2	3	3
2	3	1										1	1	4	1	1	1	5	1	3	1	2	3	3	2	1	3	2	1	1	2	1	2	1	1	2	1	1	1	5	2	3	4	3	4	5	2	2	2
2	3	1										1	1	3	1	1	1	3	1	1	1	1	2	2	3	1	3	3	2	2	2	3	3	2	4	3	1	4	1	3	2	3	3	3	3	3	2	4	2
2	3	1										1	1	5	1	1	1	5	1	5	5	1	3	3	1	5	3	3	1	1	1	3	1	1	5	1	1	5	1	5	5	5	5	3	1	3	1	1	3
2	3	1										2	2	3	2	2	3	3	2	3	3	2	3	3	3	3	3	3	2	2	3	2	4	3	2	4	3	2	2	3	3	3	3	3	3	3	2	2	3
2	3	1										1	1	4	1	1	1	5	1	2	2	2	3	3	3	3	3	2	3	2	3	3	3	3	2	3	3	2	1	4	1	2	2	1	4	5	5	4	3
2	3	1										2	2	3	2	2	2	3	2	3	3	3	3	3	3	3	3	3	3	2	3	2	3	2	2	3	3	2	2	3	3	3	3	3	3	3	3	2	2
2	3	1										2	2	4	2	2	2	3	2	3	3	3	2	3	3	3	3	3	4	2	4	2	4	4	2	4	3	2	3	1	4	3	4	4	2	1	1	1	3
2	3	1										1	1	3	1	1	1	5	1	1	1	1	1	1	1	1	1	1	1	1	1	5	1	1	1	1	1	1	1	5	5	5	1	5	1	5	1	1	1
2	3	1										2	2	4	1	2	1	4	2	3	2	2	1	3	2	2	2	4	2	2	3	2	3	3	1	3	3	3	1	4	3	2	3	1	4	4	4	4	2
2	3	1										1	1	5	1	3	1	5	1	1	1	1	2	1	3	1	2	1	1	1	2	2	2	1	2	2	1	2	1	5	2	3	3	2	3	5	2	3	1
2	3	1										1	1	4	5	5	5	4	1	4	3	3	1	2	4	3	4	3	2	1	2	1	2	1	1	2	2	2	3	2	5	5	4	5	2	2	1	5	3
2	3	1										1	1	4	1	1	1	5	1	2	2	2	2	3	2	2	3	2	2	2	2	3	3	2	4	3	2	4	1	4	2	3	2	2	4	5	3	4	3
2	3	1										1	1	2	1	1	1	2	1	3	3	2	2	2	2	2	2	2	3	1	4	2	3	3	4	3	3	4	2	4	3	2	3	2	3	3	2	3	2
2	3	1										1	1	5	1	1	1	3	1	1	1	1	1	3	1	1	3	3	1	1	2	3	3	2	3	3	2	3	2	3	2	3	3	2	3	3	2	4	3
2	3	1										1	1	3	1	1	1	4	1	2	2	1	2	4	4	2	4	2	2	1	4	2	2	2	2	2	3	2	1	4	2	2	2	2	4	1	2	4	2
2	3	1										1	1	5	1	1	1	5	1	2	2	2	3	3	3	2	3	3	2	1	2	2	2	2	3	3	2	4	1	4	2	2	3	1	4	2	4	4	2
2	3	1										1	1	4	2	1	2	4	1	1	1	1	2	1	4	2	4	3	1	1	1	2	2	1	1	2	1	2	1	4	1	3	2	2	4	4	2	4	2
2	3	1										1	1	3	1	1	1	5	1	1	2	1	2	2	3	1	3	2	1	1	2	2	2	2	2	2	1	2	1	4	2	2	3	2	4	4	2	3	2
2	3	1										1	1	3	1	1	1	2	1	1	1	1	3	4	2	1	3	4	2	1	2	1	1	2	2	1	2	2	1	4	1	2	3	1	4	1	3	3	1
2	3	1										1	2	3	2	2	2	4	2	3	3	3	3	4	3	2	3	3	2	2	3	3	3	3	3	2	3	3	1	3	2	2	3	2	3	4	2	3	2
2	3	1										4	3	4	2	2	3	4	3	4	3	3	4	4	4	3	4	3	3	2	3	2	4	3	2	4	3	3	2	4	4	5	1	4	3	3	1	1	4
2	3	1										1	1	3	1	1	1	4	1	2	2	1	2	2	3	2	3	2	2	2	2	2	3	2	2	3	2	4	1	4	2	2	2	1	4	2	2	3	1
2	3	1										1	1	1	1	1	1	4	1	1	1	2	4	1	1	2	2	1	1	1	1	5	1	1	5	5	1	5	1	3	1	1	3	1	3	5	2	4	1
2	3	1										3	3	4	4	3	3	3	3	3	2	3	3	3	3	3	3	3	3	3	3	3	3	3	3	3	4	3	3	3	3	3	4	3	3	3	3	2	3
2	3	1										1	1	3	1	1	2	4	2	2	3	2	3	2	2	2	3	2	2	2	3	3	2	2	2	2	2	2	2	3	2	3	2	2	3	3	2	2	2
2	3	1										2	2	3	2	2	3	4	2	2	2	2	2	2	2	2	2	2	2	2	2	2	2	2	2	2	2	2	1	4	3	3	3	3	3	3	3	3	3
2	4	2										1	1	5	1	1	1	5	1	2	1	1	3	4	3	1	2	1	3	1	2	2	2	3	4	2	2	4	2	2	3	3	3	3	3	2	2	2	3
2	4	2										1	1	4	1	3	1	5	2	2	2	2	2	2	2	2	2	2	2	2	2	2	2	2	4	2	2	2	2	3	2	2	2	3	4	2	2	2	2
2	4	2										1	1	4	1	1	1	4	2	2	2	2	3	2	3	1	2	3	1	2	2	3	3	1	2	3	1	2	1	3	2	1	2	2	3	2	2	3	2
2	4	2										1	1	5	2	1	3	5	1	2	1	1	1	2	2	1	2	2	2	1	5	2	4	2	2	3	2	3	1	5	1	2	1	1	4	5	4	5	1
2	4	2										2	2	2	2	2	2	4	1	2	1	1	2	2	2	1	2	2	2	1	2	4	2	2	2	2	2	2	2	3	2	4	4	4	2	4	2	2	2
2	4	2										1	1	5	1	1	1	5	1	1	1	1	3	4	4	1	4	4	1	1	1	1	1	1	5	1	1	5	1	5	3	1	1	3	5	5	5	5	1
2	4	2										1	1	3	1	1	1	5	1	1	1	1	3	3	3	1	3	3	1	1	3	1	3	1	1	3	1	1	1	3	1	3	3	3	3	3	1	1	3
2	4	2										1	1	3	1	1	3	5	2	1	1	1	3	3	4	1	3	1	2	1	1	3	2	1	3	3	1	3	1	4	1	2	2	1	5	1	4	5	2
2	4	2										1	1	5	1	1	1	5	1	1	1	1	1	1	1	1	1	1	1	1	2	1	3	1	1	3	1	1	1	1	5	5	1	1	1	2	1	1	1
2	4	2										1	1	4	1	1	4	5	1	1	1	1	1	1	1	1	1	1	1	3	1	3	5	1	5	5	1	5	1	3	3	2	1	3	4	5	5	5	1
2	4	2										1	1	5	1	1	1	5	1	1	1	1	2	2	3	1	2	2	2	1	2	1	1	1	1	1	2	2	1	1	1	2	1	1	5	3	1	1	1
2	4	2										1	1	5	1	1	2	4	1	4	1	2	2	4	5	3	3	3	2	2	4	5	1	2	4	1	2	2	1	4	1	1	1	1	5	5	5	5	2
2	4	2										2	2	4	2	2	2	4	1	2	1	2	1	2	2	2	2	2	2	1	2	1	2	2	2	2	1	2	1	5	1	1	1	2	4	5	1	5	1
2	4	2										1	1	2	1	1	1	4	2	2	2	2	2	2	2	2	2	2	2	2	2	4	3	2	4	3	4	4	1	4	3	2	4	2	4	2	2	4	2
2	4	2										1	2	5	1	1	2	5	1	1	1	1	1	2	2	1	2	2	2	1	2	3	3	2	2	3	2	2	1	2	1	2	2	1	5	5	3	5	1
2	4	2										1	1	5	1	1	3	5	1	2	1	1	1	1	1	1	3	2	3	1	3	3	2	3	2	2	1	2	4	3	3	4	2	3	3	3	2	3	3
2	4	2										1	1	3	1	1	1	3	2	2	2	2	3	2	3	3	3	2	1	2	3	2	3	2	3	3	2	3	2	3	3	3	3	3	3	3	3	3	3
2	4	2										1	1	5	2	1	3	5	1	2	2	1	2	2	3	1	2	2	1	1	2	1	2	1	4	2	1	2	1	5	1	2	2	1	5	5	3	5	2
2	4	2										2	2	4	1	1	4	4	2	2	2	2	2	2	2	2	3	2	4	3	4	1	3	3	3	3	3	3	2	2	2	3	2	3	2	3	2	4	2
2	4	2										1	1	3	1	1	1	2	1	1	1	1	3	1	3	1	1	3	1	1	2	1	2	1	1	2	1	1	1	2	1	1	2	2	2	4	4	3	1
2	4	2										5	5	1	5	5	3	1	5	5	5	5	3	5	4	5	5	4	3	4	5	3	3	5	1	3	5	1	5	4	5	4	5	5	1	1	5	5	5
2	4	2										1	3	3	4	4	4	3	3	3	3	2	3	4	3	3	3	3	5	4	4	2	3	3	4	3	3	4	3	3	2	3	4	3	2	2	2	3	3
2	4	2										2	1	3	2	1	2	3	2	1	1	1	2	2	2	3	2	2	2	1	4	2	2	2	2	2	2	2	1	1	2	3	5	4	3	3	1	1	2
2	4	2										1	1	4	1	1	3	4	1	1	1	1	3	2	2	1	1	1	2	1	3	3	4	2	4	3	1	4	1	4	1	1	1	1	4	1	4	4	2
2	4	2										1	1	4	1	1	1	1	2	2	2	2	2	2	2	2	2	2	3	3	4	3	3	2	3	3	2	2	2	4	3	2	2	3	3	3	2	4	2
2	4	2										1	1	5	1	1	1	5	1	1	1	1	3	1	2	1	2	1	2	4	1	2	2	1	2	2	1	4	1	4	1	2	2	1	4	1	1	3	3
2	4	2										1	1	5	1	2	3	3	3	1	1	2	3	3	3	3	4	3	3	3	3	1	5	1	1	3	2	1	1	3	3	3	3	3	3	3	1	3	3
2	4	2										1	1	4	1	1	3	4	1	1	1	1	1	2	1	2	2	2	2	1	2	3	3	1	2	3	2	2	2	4	1	1	2	1	4	3	2	4	1
2	4	2										1	1	4	1	1	1	4	1	1	1	1	3	3	2	1	3	3	1	2	1	3	2	1	2	3	1	3	2	2	2	2	2	4	3	2	3	2	2
2	4	2										1	1	5	1	1	3	3	1	2	2	1	3	3	2	1	3	3	1	1	3	3	2	2	2	3	2	1	1	3	1	1	3	1	5	5	1	5	1
2	4	2										1	1	3	3	1	5	3	2	2	3	2	2	3	3	2	3	3	2	1	1	3	2	3	4	2	1	3	2	3	2	3	4	1	3	5	1	4	2
2	4	2										1	3	2	1	1	2	2	2	2	2	2	2	2	2	2	3	3	1	1	3	2	2	2	2	3	2	1	2	2	3	3	1	1	3	2	1	1	2
2	4	2										1	3	5	2	1	3	2	1	1	1	1	1	2	1	1	4	1	2	3	1	1	3	1	2	2	1	2	1	4	2	1	2	1	2	1	2	2	3
2	4	2										1	1	5	1	1	1	5	1	1	1	2	2	2	1	1	2	1	1	1	1	2	2	1	2	2	1	2	2	4	2	3	3	2	3	5	4	3	2
2	4	2										2	2	4	2	2	3	4	2	3	3	3	3	4	2	3	3	2	2	2	3	1	3	2	2	3	2	4	1	4	2	3	2	3	2	4	2	4	2
2	4	2										1	1	5	1	1	1	3	3	2	1	3	3	3	3	1	2	3	1	3	3	1	2	1	3	4	1	1	2	2	3	2	3	1	3	5	3	1	3
2	4	2										2	2	2	3	3	2	3	3	2	1	1	3	1	2	2	5	1	1	2	1	2	2	3	2	2	3	2	5	1	5	5	5	5	1	5	1	1	5
2	4	2										3	1	3	2	1	2	4	3	2	2	2	4	2	2	2	3	2	3	2	3	3	3	4	4	3	3	2	1	2	3	3	2	3	2	2	1	3	2
2	4	1										1	2	2	2	1	3	3	2	2	3	1	2	1	2	2	2	2	2	3	2	2	4	1	5	2	5	2	2	3	1	1	1	2	2	2	2	1	3
2	4	1										1	2	3	2	1	2	3	1	2	1	1	1	3	3	2	3	2	2	2	2	3	3	2	4	2	2	4	1	4	2	2	2	2	3	4	3	4	2
2	4	1										2	2	3	2	3	2	2	3	3	2	2	3	4	2	3	2	2	3	2	3	2	3	2	2	2	3	4	2	3	3	3	4	3	4	2	2	2	3
2	4	1										1	1	5	1	1	3	5	1	1	1	1	1	1	3	1	2	2	4	1	4	4	4	2	2	4	2	4	1	5	1	3	2	1	4	5	4	5	1
2	4	1										1	2	3	2	2	1	4	2	4	3	3	2	5	3	3	3	4	3	2	4	2	4	3	3	4	3	4	1	4	2	2	2	2	4	2	2	3	2
2	4	1										2	2	3	2	2	2	3	2	3	2	2	3	3	2	3	3	2	2	3	3	2	3	2	2	3	3	2	3	3	3	3	3	3	3	3	3	3	3
2	4	1										2	2	4	2	2	2	4	2	4	3	2	2	4	4	3	4	2	2	2	3	2	3	2	2	3	3	2	3	3	3	3	3	3	3	3	3	2	3
2	4	1										3	3	3	3	3	3	3	3	4	3	3	3	3	3	3	4	3	4	4	4	3	4	3	3	4	4	3	2	3	2	3	3	2	4	3	3	3	3
2	4	1										2	3	3	3	2	2	4	2	2	2	2	3	4	2	3	3	2	4	3	4	2	4	4	3	4	4	3	2	2	3	3	3	2	4	4	2	3	2
2	4	1										5	5	1	5	3	3	3	3	4	5	4	4	3	3	3	5	4	3	4	5	3	5	5	4	3	5	4	1	5	1	1	1	2	5	1	3	5	2
2	4	1										1	1	3	1	1	1	4	1	1	1	2	1	1	1	2	3	1	1	1	1	1	1	1	2	1	1	2	2	5	3	2	3	2	3	2	3	4	2
2	4	1										1	1	3	2	3	2	3	2	4	3	3	3	4	4	3	3	3	3	2	5	3	4	5	2	4	4	4	2	3	3	4	3	3	3	3	2	3	3
2	4	1										2	2	3	2	2	3	3	2	3	2	2	3	3	4	2	4	3	2	2	3	2	3	3	2	3	3	2	2	1	3	3	3	4	2	4	2	2	3
2	4	1										1	1	3	2	1	3	5	2	2	1	2	2	2	3	2	3	2	1	2	2	3	3	2	3	3	2	3	1	4	2	1	4	1	4	2	3	2	2
2	4	1										1	1	3	1	3	3	3	2	2	2	1	3	3	2	2	3	2	3	2	3	2	3	3	3	3	3	4	2	1	3	3	3	4	3	3	2	2	3
2	4	1										2	3	3	2	3	3	1	3	4	3	4	2	5	2	5	3	5	5	3	5	1	5	3	2	5	4	5	5	1	5	5	5	5	1	1	1	1	5
2	4	1										3	2	2	2	2	4	3	3	4	3	3	4	3	4	3	3	3	3	3	4	2	3	3	2	2	3	2	2	2	2	2	3	4	2	2	2	2	3
2	4	1										1	1	1	1	1	1	3	1	4	4	2	3	5	4	3	4	4	3	2	5	4	5	2	3	4	3	2	1	5	1	1	1	1	5	5	4	5	1
2	4	1										4	2	3	3	3	2	3	3	3	4	3	3	3	3	4	3	3	3	3	4	3	4	4	3	3	4	3	2	4	3	3	2	3	4	3	3	3	2
2	4	1										1	3	5	1	2	2	4	1	3	2	2	3	2	2	2	1	3	4	2	3	3	3	2	2	3	3	3	1	3	2	2	3	2	3	4	2	3	2
2	4	1										1	1	1	1	1	1	1	1	1	1	1	1	1	1	1	1	1	2	1	2	1	2	1	3	1	2	3	1	2	2	1	2	2	2	2	2	2	2
2	4	1										2	2	3	2	3	3	3	3	4	3	3	4	3	3	3	3	3	3	3	3	3	3	3	3	3	4	3	3	3	3	3	3	3	4	3	3	3	3
2	4	1										1	3	5	1	1	1	5	1	3	1	2	1	2	2	3	3	1	1	2	2	3	3	2	3	3	2	4	2	3	2	3	3	3	3	4	3	2	3
2	4	1										1	1	4	1	1	1	5	1	1	1	1	1	1	1	1	2	1	1	1	1	3	1	1	4	1	1	2	5	5	1	1	1	1	4	1	2	2	1
2	4	1										1	1	4	1	1	1	5	2	3	2	2	3	2	2	2	2	2	2	2	3	2	3	2	2	3	2	2	2	4	2	3	3	2	4	4	3	4	2
2	4	1										1	1	3	1	1	1	4	1	1	2	1	1	2	2	2	2	1	1	1	2	2	3	1	2	2	2	2	1	3	3	3	3	2	2	1	3	3	1
2	4	1										1	2	5	1	1	2	4	1	2	2	1	3	3	3	2	3	2	2	1	2	2	2	2	2	2	1	2	1	4	1	1	2	1	4	5	4	4	2
2	4	1										3	1	3	1	2	3	1	5	4	5	4	5	5	5	5	3	3	5	4	4	5	3	5	3	3	4	5	5	1	5	5	1	5	1	1	1	1	5
2	4	1										2	2	4	2	2	2	1	2	2	2	2	2	2	2	2	2	2	2	2	2	2	3	2	3	2	2	3	2	4	3	2	3	3	3	3	2	3	3
2	4	1										1	1	5	1	1	1	5	2	2	2	2	3	3	3	3	3	2	2	2	3	4	3	2	2	3	3	2	1	4	1	1	2	1	4	5	2	4	2
2	4	1										2	2	4	2	2	2	4	2	4	4	4	3	3	4	4	3	3	3	3	4	4	4	3	4	4	4	4	3	3	3	3	3	3	3	3	3	3	3
2	4	1										1	1	4	1	1	1	4	1	2	2	1	3	3	2	3	2	3	2	2	3	2	2	1	4	3	1	4	2	2	3	3	3	2	2	2	2	2	3
2	4	1										1	1	3	1	1	2	4	1	2	2	1	3	3	3	1	3	3	2	1	2	1	3	1	2	3	1	2	2	3	2	3	3	2	2	1	1	1	2
2	4	1										2	2	2	2	1	2	4	2	2	2	2	2	2	2	3	2	2	2	2	3	2	2	2	2	2	2	2	2	4	3	2	3	2	3	2	2	3	2
2	4	1										1	1	4	1	2	2	4	2	5	5	3	2	4	3	4	4	4	3	2	4	1	3	3	2	3	3	2	3	4	3	4	2	4	2	3	2	2	4
2	4	1										2	2	2	2	2	2	4	2	3	3	2	3	3	2	3	2	2	2	3	3	2	2	3	2	2	3	3	2	4	3	2	3	3	3	3	3	3	2
2	4	1										1	1	4	1	1	2	4	3	3	3	3	3	3	3	3	3	2	3	4	4	2	3	4	4	4	4	4	2	3	3	3	2	3	1	1	2	1	3
2	4	1										2	1	3	2	2	2	3	2	2	2	2	2	3	2	3	3	2	2	2	2	2	3	2	2	3	2	2	2	2	3	3	3	5	1	2	1	1	2
2	4	1										3	3	3	1	2	3	3	3	3	3	4	3	3	4	3	3	3	3	3	3	3	3	4	3	3	3	3	3	4	3	2	3	2	1	3	2	3	1
2	4	1										1	1	4	1	1	1	5	1	2	1	1	1	3	2	2	3	1	1	1	2	3	3	3	3	3	2	4	3	1	4	5	1	3	1	3	1	1	3
2	6	2										1	1	4	1	1	2	4	2	2	2	2	2	2	4	2	2	1	2	1	2	3	4	2	4	4	2	2	2	4	2	2	2	2	3	2	2	3	2
2	6	2										1	1	5	1	1	1	2	2	1	1	2	2	2	2	1	2	2	1	2	1	2	2	1	1	2	2	2	1	1	3	4	3	2	3	2	1	1	2
2	6	2										1	3	4	2	1	3	1	1	1	1	1	3	2	3	3	2	3	4	1	4	3	3	2	2	3	2	2	2	2	3	2	2	3	3	4	3	4	2
2	6	2										1	1	3	1	1	1	1	1	1	1	1	1	1	3	1	3	3	1	1	2	1	1	1	1	1	1	1	2	1	2	2	3	1	5	4	1	2	2
2	6	2										1	1	4	1	1	2	4	2	2	3	2	3	4	3	3	4	3	2	1	2	2	2	1	1	2	2	1	2	4	2	1	2	1	4	4	2	2	2
2	6	2										1	1	5	1	1	2	5	1	2	1	2	1	2	2	2	2	1	2	2	3	3	4	2	2	3	2	4	1	2	2	3	2	3	3	3	1	3	2
2	6	2										4	4	5	4	1	5	5	2	2	2	2	2	4	3	2	2	4	3	2	4	2	2	4	2	3	4	2	2	2	4	2	2	4	3	3	1	4	2
2	6	1										1	2	3	3	2	3	3	2	3	3	3	4	4	4	4	5	4	3	3	4	3	4	4	2	3	4	4	2	2	3	3	2	3	4	3	2	2	3
2	6	1										1	2	5	1	1	1	3	2	2	1	1	2	2	2	2	2	1	1	2	2	1	2	2	2	1	2	2	2	2	2	2	3	3	3	4	3	3	2
2	6	1										2	2	5	2	3	2	4	2	2	3	3	3	3	2	2	2	3	4	2	4	4	4	2	4	2	5	3	2	1	3	3	4	3	2	3	2	1	3
2	6	1										2	2	3	2	1	2	3	2	2	2	2	2	2	2	2	3	2	3	2	3	2	2	3	2	2	2	2	2	2	3	3	3	3	3	3	3	3	3
2	6	1										1	1	3	1	3	2	2	2	4	2	3	3	4	2	3	3	4	5	3	5	2	3	3	1	3	5	2	3	3	3	3	3	3	3	3	3	3	3
2	6	1										2	2	5	2	1	2	4	2	2	2	2	2	2	2	3	3	2	2	2	2	2	2	2	2	2	2	2	3	3	3	3	4	4	1	1	1	1	3
2	6	1										1	1	4	1	2	2	4	2	2	2	2	3	3	3	2	3	3	3	2	2	3	3	2	3	3	2	3	1	4	3	1	3	2	4	4	3	3	2
2	6	1										1	1	4	1	1	2	5	1	1	1	1	1	1	2	1	2	2	2	1	1	2	1	1	2	1	1	2	2	4	1	1	2	1	4	1	2	4	1
2	6	1										1	1	3	1	2	1	5	1	2	1	1	2	3	2	1	1	1	1	1	2	2	2	1	4	1	2	4	1	1	4	3	4	4	1	1	1	1	3
2	6	1										2	2	4	2	2	4	3	2	3	3	3	3	3	3	3	3	3	2	2	3	2	3	2	2	3	2	2	2	3	3	3	2	3	3	3	2	2	2
2	6	1										1	1	3	1	2	1	4	1	3	3	1	1	3	2	2	1	1	3	1	4	1	3	3	1	3	3	1	3	3	3	3	3	4	3	3	2	2	2
2	6	1										1	1	4	1	1	1	4	1	1	2	1	1	2	1	2	3	1	2	1	3	2	2	1	2	3	1	2	2	3	2	1	3	2	4	4	4	3	2
2	6	1										2	2	3	2	2	2	4	2	3	3	2	2	4	3	3	4	3	3	2	4	3	4	2	2	4	3	3	2	3	3	3	3	3	3	3	3	3	3
2	6	1										1	1	3	1	2	1	4	2	2	2	2	2	4	3	2	2	2	2	2	3	2	3	3	3	3	3	3	3	4	3	2	3	3	3	2	3	3	3
2	6	1										1	1	4	1	1	1	4	2	2	2	1	3	4	4	2	4	3	2	2	2	4	3	1	4	3	2	4	2	4	3	3	5	2	1	4	1	2	2
2	5	2										1	2	5	1	1	3	5	1	1	1	1	3	3	3	1	1	3	1	1	1	4	1	1	4	1	1	4	1	5	1	1	4	1	5	5	4	5	1
2	5	2										1	1	3	1	1	1	3	1	2	2	2	2	3	2	3	3	2	3	2	3	3	3	3	4	3	2	4	1	4	2	2	2	2	4	2	2	4	2
2	5	2										1	2	3	1	2	1	3	1	1	2	1	2	2	1	2	3	2	2	2	2	2	2	2	4	2	1	2	2	5	2	2	3	1	4	2	4	4	2
2	5	2										1	1	5	1	1	3	5	2	1	1	1	1	3	1	1	2	1	2	1	1	5	2	1	1	3	1	5	1	4	1	1	1	1	1	1	2	5	1
2	5	2										1	1	5	1	3	3	5	1	1	2	1	2	3	1	1	3	3	2	3	1	4	3	1	4	4	1	4	1	5	2	2	3	2	5	5	2	2	2
2	5	2										1	1	1	1	1	1	4	1	2	2	2	3	1	3	2	3	2	2	2	2	2	3	2	3	4	2	3	1	2	1	3	1	2	4	4	1	4	2
2	5	2										1	2	5	1	1	3	3	1	1	1	2	1	2	1	1	2	2	1	1	1	2	2	3	2	2	2	3	1	5	1	1	2	2	2	1	3	4	1
2	5	2										2	2	3	2	2	2	2	2	4	2	2	3	4	3	4	3	4	4	4	4	4	2	3	4	2	4	4	4	4	2	2	2	2	4	4	2	3	4
2	5	2										1	1	4	1	1	1	4	1	1	1	1	1	2	1	1	2	1	1	1	2	2	2	1	3	2	1	3	2	3	1	1	3	1	5	4	2	4	2
2	5	2										3	3	2	1	3	1	4	2	2	2	1	2	3	2	2	3	1	2	3	4	3	4	3	4	4	2	4	1	1	1	4	1	3	1	1	1	1	1
2	5	2										4	4	5	4	3	2	2	2	2	2	2	2	2	2	2	2	2	2	2	1	2	3	2	4	3	1	2	2	3	3	4	3	3	2	3	2	2	3
2	5	2										5	5	3	5	5	4	4	5	2	2	5	5	3	3	2	3	5	4	5	5	1	2	4	4	2	4	4	5	1	5	5	5	5	1	5	1	1	5
2	5	2										1	1	3	1	1	2	5	1	2	2	2	2	3	2	3	3	2	2	2	3	1	3	1	2	3	2	2	2	1	3	5	3	3	1	2	1	1	3
2	5	2										1	1	5	1	1	1	4	1	1	1	1	1	2	2	1	1	2	1	1	1	1	1	1	5	2	1	5	1	4	1	1	2	3	5	3	4	4	1
2	5	2										2	2	4	2	2	4	4	2	4	4	2	2	4	2	4	2	4	4	3	5	2	3	4	3	3	4	3	5	1	5	5	2	5	1	4	1	1	5
2	5	2										5	5	5	5	5	5	5	5	5	5	5	5	3	5	5	4	5	5	5	5	5	5	5	5	5	5	5	5	1	1	1	1	1	1	1	1	1	1
2	5	2										2	2	2	2	2	2	2	2	2	2	2	1	2	2	2	4	4	2	2	2	2	2	2	2	2	2	2	2	1	4	4	3	4	1	2	1	2	2
2	5	2										2	2	3	2	2	2	4	1	1	2	2	4	4	3	2	4	2	2	4	4	1	2	2	4	2	2	2	2	1	5	5	5	3	1	4	1	1	2
2	5	2										2	4	2	5	4	4	2	2	5	5	4	4	5	5	5	2	4	4	5	5	1	2	5	4	2	5	5	2	1	5	4	3	5	1	2	1	1	2
2	5	2										2	3	3	4	3	2	4	2	4	4	2	2	2	4	4	4	2	4	4	4	1	3	4	4	3	4	4	5	2	4	4	3	3	1	2	2	2	1
2	5	2										2	3	3	3	3	2	2	3	4	4	3	4	4	4	4	4	4	4	4	4	3	3	4	4	3	4	4	2	2	4	4	3	4	1	2	2	1	2
2	5	2										4	2	4	4	2	1	4	4	4	2	2	4	4	4	4	4	2	4	4	4	2	4	4	2	4	4	2	4	1	4	4	4	4	1	2	1	1	2
2	5	2										3	4	3	2	3	2	4	3	4	4	4	3	4	4	3	3	3	3	4	4	2	3	4	4	3	4	4	3	2	3	3	3	3	1	3	1	2	2
2	5	2										2	3	3	3	2	2	4	2	2	2	3	2	2	3	4	4	3	2	2	4	2	3	4	2	3	4	2	2	4	4	4	3	3	1	3	2	2	2
2	5	2										3	2	3	2	2	2	4	2	2	1	2	2	3	2	4	2	2	2	2	4	1	3	4	4	3	2	4	4	1	4	4	3	4	1	2	1	1	2
2	5	2										1	1	3	2	2	2	4	2	2	2	1	2	2	3	2	4	2	2	2	4	2	2	2	2	2	2	2	5	1	4	5	4	5	2	2	1	1	1
2	5	2										1	3	4	1	1	2	4	1	2	1	1	2	2	3	4	4	3	2	2	2	1	2	2	4	2	2	4	3	1	4	4	4	4	2	2	1	1	1
2	5	2										2	3	3	2	3	2	4	2	3	4	2	3	3	3	4	4	3	4	2	4	2	3	4	4	3	4	4	4	4	4	4	3	4	2	2	2	2	2
2	5	2										2	4	4	2	2	3	4	2	2	2	2	2	2	2	2	2	2	4	1	2	3	2	2	4	2	1	4	2	2	2	2	2	2	4	4	2	3	2
2	5	2										2	2	2	2	2	2	4	2	2	2	2	2	2	2	4	2	2	2	2	2	2	3	2	4	2	2	4	5	1	5	2	3	4	1	1	1	1	2
2	5	2										1	1	5	1	1	5	5	1	3	1	1	3	3	3	3	3	3	3	1	3	5	3	1	5	3	2	5	1	5	1	1	1	1	3	5	5	5	1
2	5	2										1	1	5	1	1	2	5	1	2	1	1	2	1	1	3	3	2	3	1	3	3	3	2	2	3	1	1	2	2	4	3	3	2	2	3	1	2	3
2	5	2										1	2	5	1	1	3	5	1	1	1	1	4	3	3	3	3	3	1	1	1	3	1	1	2	1	1	2	1	2	1	1	1	1	5	5	5	5	1
2	5	2										1	1	4	3	2	2	5	1	2	1	1	2	4	4	2	4	4	1	2	1	2	2	1	2	2	1	4	2	4	2	2	2	2	4	2	3	3	2
2	5	2										2	3	4	2	2	3	3	2	4	4	2	3	3	3	4	2	2	2	2	3	2	3	3	3	3	3	3	2	1	4	4	3	4	2	1	2	1	3
2	5	2										3	3	3	3	3	3	3	3	3	3	3	3	3	3	3	3	3	3	3	3	3	3	3	3	3	3	3	3	1	4	4	3	5	2	2	2	2	4
2	5	2										1	1	3	1	1	2	4	2	1	2	2	1	2	2	2	1	2	2	2	2	4	3	2	3	3	2	3	2	2	2	1	2	2	4	2	3	3	2
2	5	2										1	2	4	1	1	3	5	1	2	2	2	2	2	3	3	4	3	1	1	2	3	2	1	1	3	1	3	1	5	1	1	3	1	5	4	4	5	2
2	5	2										2	2	4	2	2	2	4	2	2	2	2	2	3	3	2	2	2	2	2	3	2	3	2	2	3	2	2	2	4	3	2	2	2	3	3	2	2	2
2	5	2										1	1	3	1	1	2	5	1	1	1	1	3	3	3	1	3	1	1	1	1	2	2	1	1	2	1	3	1	3	1	2	3	2	3	2	3	2	1
2	5	2										2	2	4	2	2	3	3	2	1	2	3	2	2	3	2	2	2	2	3	3	3	2	2	3	2	2	1	5	2	3	5	5	3	2	3	1	2	2
2	5	2										2	2	5	3	3	3	3	2	2	2	2	3	2	2	2	2	2	2	2	2	1	1	2	3	1	4	3	3	1	3	5	4	2	3	5	5	1	3
2	5	2										1	2	3	2	2	1	1	1	1	1	1	1	1	1	3	2	1	2	1	1	3	3	1	1	1	1	1	3	1	5	3	4	1	1	4	1	3	4
2	5	2										2	2	2	2	2	2	2	2	4	2	2	2	2	2	2	2	2	2	2	2	2	2	2	2	2	2	2	2	3	3	3	2	3	2	2	2	2	2
2	5	2										5	5	3	5	5	4	1	4	4	4	5	4	5	5	4	5	5	4	4	4	2	2	5	2	1	4	1	2	1	4	4	5	5	1	1	1	1	1
2	5	2										1	1	3	2	1	1	2	2	3	2	2	1	2	2	3	3	2	3	1	4	2	2	2	2	2	4	1	2	1	4	5	3	5	2	5	1	1	2
2	5	2										1	1	5	1	1	1	1	1	2	1	2	3	3	3	2	1	2	1	1	1	2	1	1	1	1	1	1	1	2	1	2	2	5	5	5	1	3	1
2	5	2										1	1	4	2	1	2	4	1	2	2	1	2	2	2	1	3	3	2	1	3	1	3	2	2	2	1	2	2	5	3	1	3	3	5	3	3	2	2
2	5	2										3	4	4	3	2	4	4	3	1	1	1	1	1	1	1	1	2	1	3	1	1	3	1	1	3	3	1	3	1	4	2	5	4	2	4	1	1	4
2	5	2										1	4	3	4	4	4	3	2	2	2	2	2	1	2	2	2	2	2	4	3	2	2	2	4	2	2	2	2	1	5	4	4	5	2	4	2	1	4
2	5	2										1	1	3	1	1	1	5	2	2	2	2	3	3	3	2	3	2	2	1	2	1	3	2	4	3	2	4	3	2	3	3	2	4	4	3	3	4	2
2	5	2										1	1	5	1	1	1	5	1	1	1	2	2	4	3	3	3	3	3	3	2	2	3	2	4	3	2	4	2	4	2	3	3	2	4	4	3	3	1
2	5	2										1	1	2	1	1	1	4	1	1	1	1	2	2	1	3	3	1	4	2	3	1	3	2	2	3	3	5	5	3	3	3	3	3	1	3	1	1	3
2	5	2										1	1	3	1	1	1	5	1	2	1	1	2	2	1	2	1	1	1	1	2	1	2	1	1	1	1	1	2	2	2	2	2	2	4	1	2	4	1
2	5	2										1	1	5	1	2	3	5	1	1	1	1	1	1	1	1	1	1	1	2	3	3	3	1	1	5	3	2	1	1	3	5	2	3	3	3	1	3	1
2	5	1										3	3	2	1	3	1	2	3	4	4	1	2	1	3	4	1	2	3	4	3	2	3	3	3	2	2	3	1	3	3	1	2	3	1	4	3	5	2
2	5	1										4	1	3	2	3	3	5	2	5	5	3	5	2	5	3	4	4	5	3	5	4	5	5	1	5	5	5	5	2	1	5	3	3	1	3	1	5	3
2	5	1										2	2	5	1	2	2	5	2	3	2	1	4	5	4	1	5	5	2	1	5	3	4	2	1	4	4	2	2	1	1	2	3	2	5	4	2	3	1
2	5	1										2	2	3	2	2	1	3	1	2	2	2	1	3	1	5	5	2	2	2	2	1	2	2	2	1	2	2	2	1	4	4	5	3	1	3	1	5	3
2	5	1										3	3	3	2	3	3	4	2	4	4	3	4	5	3	3	4	4	3	2	4	3	5	3	3	3	4	3	3	3	3	3	3	3	3	3	3	3	3
2	5	1										1	1	5	2	3	3	2	1	3	1	1	3	3	1	1	2	4	4	2	4	2	4	4	4	4	4	3	5	1	5	5	3	5	1	3	1	1	3
2	5	1										1	1	3	3	2	3	4	2	5	2	1	3	4	4	5	2	2	2	2	1	3	3	1	2	2	3	2	2	4	1	5	5	5	1	3	3	1	1
2	5	1										1	1	3	1	2	1	3	2	2	2	2	2	2	2	2	3	2	3	3	2	2	3	2	3	2	2	2	2	3	3	3	3	3	2	3	2	2	3
2	5	1										2	3	3	3	2	1	2	2	4	4	3	2	3	3	3	3	3	2	3	3	2	3	3	3	3	3	3	3	4	3	3	3	3	2	2	3	1	3
2	5	1										1	1	3	1	3	2	4	3	4	3	3	3	3	3	3	3	3	3	3	5	3	3	3	3	3	3	2	2	1	3	4	5	4	1	4	1	1	4
2	5	1										2	2	2	2	2	2	2	2	2	2	2	2	2	2	2	2	2	2	2	2	2	2	2	2	2	2	2	2	2	1	2	2	2	2	2	2	2	2
2	5	1										1	1	3	1	1	2	3	2	3	2	2	2	4	3	2	2	2	3	1	3	3	2	3	2	2	3	3	3	1	3	3	4	4	2	3	1	1	3
[truncated: 64 more columns]
